# 1 Initial Characterization of the Two ClpP Paralogs of *Chlamydia* 2 *trachomatis* Suggests Unique Functionality for Each

3  
4 Nicholas A. Wood<sup>1,2</sup>, Krystal Chung<sup>3</sup>, Amanda Blocker<sup>3</sup>, Nathalia Rodrigues de Almeida<sup>4</sup>, Martin  
5 Conda-Sheridan<sup>4</sup>, Derek J. Fisher<sup>3</sup>, Scot P. Ouellette<sup>1#</sup>

6 <sup>1</sup>Department of Pathology and Microbiology, College of Medicine, University of Nebraska Medical  
7 Center, Omaha, NE

8 <sup>2</sup>Division of Basic Biomedical Sciences, Sanford School of Medicine, University of South Dakota,  
9 Vermillion, SD

10 <sup>3</sup>Department of Microbiology, Southern Illinois University Carbondale, Carbondale, IL

11 <sup>4</sup>Department of Pharmaceutical Sciences, College of Pharmacy, University of Nebraska Medical  
12 Center, Omaha, NE

13  
14  
15 Keywords: *Chlamydia*, differentiation, protein turnover, protein quality control, Clp protease

16  
17 Running Title: ClpP proteases of *Chlamydia*

18  
19  
20 #Corresponding Author:

21 Department of Pathology and Microbiology, College of Medicine, University of Nebraska Medical  
22 Center, 985900 Nebraska Medical Center (DRC2 5022), Omaha, NE

23 Tel: +1-402-559-0763 Fax: +1-402-559-5900 Email: [scot.ouellette@unmc.edu](mailto:scot.ouellette@unmc.edu)

24 **Abstract**

25 *Chlamydia* is an obligate intracellular bacterium that differentiates between two distinct  
26 functional and morphological forms during its developmental cycle: elementary bodies (EBs) and  
27 reticulate bodies (RBs). EBs are non-dividing, small electron dense forms that infect host cells. RBs  
28 are larger, non-infectious replicative forms that develop within a membrane-bound vesicle, termed  
29 an inclusion. Given the unique properties of each developmental form of this bacterium, we  
30 hypothesized that the Clp protease system plays an integral role in proteomic turnover by degrading  
31 specific proteins from one developmental form or the other. *Chlamydia* has five uncharacterized *clp*  
32 genes: *clpX*, *clpC*, two *clpP* paralogs, and *clpB*. In other bacteria, ClpC and ClpX are ATPases that  
33 unfold and feed proteins into the ClpP protease to be degraded, and ClpB is a deaggregase. Here, we  
34 focused on characterizing the ClpP paralogs. Transcriptional analyses and immunoblotting  
35 determined these genes are expressed mid-cycle. Bioinformatic analyses of these proteins identified  
36 key residues important for activity. Over-expression of inactive *clpP* mutants in *Chlamydia*  
37 suggested independent function of each ClpP paralog. To further probe these differences, we  
38 determined interactions between the ClpP proteins using bacterial two-hybrid assays and native gel  
39 analysis of recombinant proteins. Homotypic interactions of the ClpP proteins, but not heterotypic  
40 interactions between the ClpP paralogs, were detected. Interestingly, ClpP2, but not ClpP1, protease  
41 activity was detected *in vitro*. This activity was stimulated by antibiotics known to activate ClpP,  
42 which also blocked chlamydial growth. Our data suggest the chlamydial ClpP paralogs likely serve  
43 distinct and critical roles in this important pathogen.

44 **Words: 250/250**

45

46 **Importance**

47 *Chlamydia trachomatis* is the leading cause of preventable infectious blindness and of  
48 bacterial sexually transmitted infections worldwide. Chlamydiae are developmentally regulated,  
49 obligate intracellular pathogens that alternate between two functional and morphologic forms with  
50 distinct repertoires of proteins. We hypothesize that protein degradation is a critical aspect to the  
51 developmental cycle. A key system involved in protein turnover in bacteria is the Clp protease  
52 system. Here, we characterized the two chlamydial ClpP paralogs by examining their expression in  
53 *Chlamydia*, their ability to oligomerize, and their proteolytic activity. This work will help understand  
54 the evolutionarily diverse Clp proteases in the context of intracellular organisms, which may aid in  
55 the study of other clinically relevant intracellular bacteria.

56

57 **Words: 114/120**

## 58 **Introduction**

59 *Chlamydia trachomatis* is one of the most prevalent human sexually transmitted infections  
60 and the leading cause of preventable infectious blindness worldwide (1). Of particular note are the  
61 negative effects associated with untreated *C. trachomatis* infections. Because of the asymptomatic  
62 nature of 60-80% of cases (2), infection by this organism can lead to complications such as pelvic  
63 inflammatory disease, which can in turn lead to infertility and ectopic pregnancies in women (3). An  
64 infant can also acquire conjunctivitis during birth should the mother be infected, which can result in  
65 irreversible blindness if left untreated.

66 *C. trachomatis* is an obligate intracellular pathogen with a complex developmental cycle (see  
67 (4) for detailed review). These pathogenic bacteria differentiate between two distinct functional and  
68 morphological forms over the course of 48 to 72 hours, depending on the strain. The electron dense  
69 elementary body (EB) is the infectious but non-dividing form that is characterized by its histone-  
70 compacted chromosome (5) and cysteine-rich, disulfide-crosslinked outer membrane (6). The  
71 reticulate body (RB) is the non-infectious and replicating form that has a relaxed chromosome  
72 structure and lipid-based cell walls that are sensitive to disruption. The typical size of each form is  
73 ~0.3  $\mu\text{m}$  and ~1  $\mu\text{m}$ , respectively (4). A single EB initiates infection of a host cell by attaching to the  
74 plasma membrane and inducing uptake into the cell by type III secreted effectors (7) (8). The EB  
75 remains within a host-derived vesicle, which is diverted from the endocytic pathway, and  
76 differentiates into the much larger RB. The vesicle is rapidly modified into a pathogen-specified  
77 parasitic organelle termed an inclusion (9) (10). Proliferation of this RB within the inclusion follows  
78 until such time that secondary differentiation occurs, and the RBs begin to condense their genome  
79 and crosslink their outer membrane. After a significant amount of EBs have accumulated, they exit  
80 the cell for infection of surrounding cells. Proteomic and transcriptional analyses indicate that EBs  
81 and RBs have distinct patterns of gene expression and protein repertoires (11) (12) (13) (14). Given

82 the striking phenotypic differences between the two developmental forms, we hypothesize that  
83 protein turnover plays a key role in differentiation in addition to general maintenance of bacterial  
84 homeostasis during both normal and persistent growth modes (15) (16) (17).

85 Even though *Chlamydiae* exhibit such a complex developmental cycle and evade the host  
86 immune system during chronic infections, these bacteria have undergone significant reductive  
87 evolution to eliminate unnecessary genes. This in turn suggests that most genes retained by this  
88 organism likely serve an important function to bacterial fitness (18). Within its genome, *Chlamydia*  
89 encodes homologs to four caseinolytic protease *clp* genes: *clpC*, *clpX*, *clpP* (*clpP1* and *clpP2*), and  
90 *clpB*. ClpB is a putative deaggregase and does not appear to interact directly with other Clps for  
91 proteomic turnover (12). ClpC and ClpX proteins are classified as AAA+ (ATPases Associated with  
92 various cellular Activities) unfoldases that serve as adaptor proteins to linearize target proteins in an  
93 ATP-dependent manner (19) (20). ATP binding, but not necessarily hydrolysis, potentiates  
94 interaction between a homo-hexamer of these proteins and a ClpP complex in other organisms (21)  
95 (22). ClpP is a serine protease that gives peptidase function to the resultant complex (23). ClpP  
96 proteins have been shown to oligomerize into a tetradecameric complex of a stack of two heptamers  
97 that can then perform proteolytic function upon interaction with the adaptor protein oligomer (24)  
98 (25). Binding of the unfoldase protein complexes relaxes and stabilizes the N-terminal region of the  
99 ClpP complex, allowing larger substrates into the proteolytic complex.

100 Multiple pathogenic bacteria possess two *clpP* paralogs including *Pseudomonas aeruginosa*,  
101 *Listeria monocytogenes*, and *Mycobacterium tuberculosis*. The Baker lab characterized the dual  
102 ClpP system of *P. aeruginosa* and demonstrated that each system potentially has a distinct function  
103 contributing to virulence and fitness of the bacterium (26). While the group studying ClpP1/2 in  
104 *Mycobacterium* showed heterologous interactions between these paralogs, these genes are co-  
105 transcribed, suggesting coupled function (27). The dual ClpP proteases of *Listeria monocytogenes*

106 (Lm) were shown to form both hetero- and homotypic complexes (28) (29), yet the authors  
107 demonstrated that Lm ClpP2 likely can function independently of Lm ClpP1. These studies, taken  
108 together with the reductive evolution of the chlamydial genome and the distinct protein repertoires of  
109 EBs and RBs, led us to hypothesize that the chlamydial ClpPs may serve distinct and critical  
110 functions in the physiology of the organism.

111 To begin investigation of the role of the Clp protease system in chlamydial biology, we  
112 initiated a series of studies to characterize the ClpP paralogs. All *clp* genes are expressed as RB-  
113 specific gene products during the developmental cycle. Bioinformatic and structural modeling  
114 analyses indicate that ClpP1 and ClpP2 proteins retain key residues important for function as well as  
115 structure. Interestingly, over-expression of a mutant ClpP1 was detrimental to chlamydial  
116 development whereas a mutant ClpP2 had no observable effect. Over-expression of wild-type ClpPs  
117 had no effect on recovery of infectious EBs. To explore the basis of these observations, we  
118 performed a series of *in vitro* and *in vivo* assays to determine oligomerization and protease activity of  
119 each paralog. Whereas we observed homo-oligomerization of each ClpP paralog, we did not detect  
120 hetero-oligomerization between these proteins. From *in vitro* protease activity assays, we observed  
121 proteolytic activity for ClpP2 only. Consistent with this, antibiotics known to activate ClpP proteases  
122 stimulated the protease activity of ClpP2 only and blocked chlamydial growth. Combined, our data  
123 suggest ClpP1 activity may be tightly regulated. We conclude that each chlamydial ClpP protease  
124 serves a unique and independent role, either in differentiation or more conserved physiological  
125 processes.

126

## 127 **Results**

128 **The *clp* genes are expressed as RB specific genes.** We hypothesize, based on the arrangement of  
129 the genes in the chromosome, that ClpC interacts with ClpP1 and that ClpX interacts with ClpP2.

130 This does not preclude each individual component from acting independently and is not mutually  
131 exclusive to our hypothesis. We base our prediction of ClpP2X interaction due to the juxtaposition of  
132 the two genes within the same operon (Fig. 1A). We then reasoned that ClpP1 would serve as the  
133 proteolytic subunit that would interact with ClpC, as both are encoded independently of each other in  
134 separate genomic contexts (Fig. 1A). Because chlamydiae are developmentally regulated bacteria,  
135 gene expression can differ from one developmental form to the other. Gene expression in *Chlamydia*  
136 can be broadly categorized into three different stages: early-, mid-, and late-developmental cycle  
137 genes (30). Early cycle genes are involved in initial differentiation from EB to RB and establishment  
138 of the nascent inclusion. Mid-cycle genes are RB specific and typically play a role in growth and  
139 division of the RBs as well as in inclusion modification. Late cycle genes function in differentiation  
140 from an RB to an EB or serve an important function in the secondary infection of a host cell. The  
141 specificity of a transcript to a particular point of the developmental cycle can give insight into the  
142 possible function of the encoded protein. To determine when during the developmental cycle the *clp*  
143 genes are transcribed, we measured the transcription of each gene over a time course of infection.  
144 Nucleic acid samples were collected for analysis at various time points of infection using wild-type  
145 *C. trachomatis* L2. Our data indicate that the *clp* genes analyzed are transcribed in a pattern  
146 consistent with mid-cycle, RB specific function since the transcript levels peak after primary  
147 differentiation has occurred and a population of RBs has been established (i.e. 16 hpi; Fig. 1B-E).

148 In parallel, we analyzed lysates from infected cells using primary antibodies generated  
149 against the Clp proteins. Given the high level of homology between the *Pseudomonas aeruginosa*  
150 (Pa) ClpP1 and *C. trachomatis* (Ctr) ClpP2 (see Fig. 2), we speculated a polyclonal antibody  
151 developed against Pa\_ClpP1 (a kind gift of Dr. T. Baker, MIT) would detect Ctr ClpP2 by western  
152 blot. As seen, Ctr ClpP2 was detected from infected cell lysates starting at 24h post-infection (hpi)  
153 using the polyclonal anti-Pa\_ClpP1 antibody (Fig. 1C). Given the relatively low levels of ClpP2

154 compared to the major outer membrane protein (MOMP; Fig. 1F), we cannot conclude that ClpP2 is  
155 not present at earlier times or that an antibody specific to chlamydial ClpP2 would be more sensitive  
156 to detect such lower levels. The polyclonal antibody developed against Pa\_ClpP2 did not react with  
157 chlamydial lysates or recombinant Ctr ClpP1 or ClpP2 (Fig. S1). We obtained additional antibodies  
158 raised against chlamydial ClpP1, ClpX, and ClpC (a kind gift of Dr. G. Zhong, UTHSC) and used  
159 these antibodies to detect their targets (validated in Fig. 1S). We observed similar patterns of  
160 expression for these proteins as for ClpP2 although faint bands for ClpX and ClpC were observed at  
161 16hpi (Fig. 1B, D, & E). Clp protein levels mirror the transcripts and are detected from mid-  
162 developmental cycle for the remainder of the infection. These patterns are distinct to those of  
163 canonical early or late cycle genes such as *euo* or *omcB* (31) (32) (33). Operon status seems likely  
164 for *clpP2* and *clpX* given that *clpX* so closely mirrors *clpP2* with slightly lower transcript abundance.  
165 Overall, the expression data indicate that the Clp components are expressed primarily in the RB  
166 phase of growth and division. This does not, however, preclude these proteins from having functions  
167 at other times during the developmental cycle.

168

169 **Bioinformatics analyses identify key residues important for structure and function of each**  
170 **chlamydial ClpP paralog.** We hypothesized that each ClpP paralog of *C. trachomatis* serves  
171 distinct functions in the biology and pathogenesis of this unique bacterium, despite their similarity in  
172 expression patterns. To further test this hypothesis, we performed a series of bioinformatics analyses.  
173 We began by looking at pairwise alignments of the chlamydial ClpP proteins against each other and  
174 against ClpP homologs from other bacteria (Fig. 2A). Interestingly, each chlamydial ClpP shared  
175 more homology to ClpP of *E. coli*, at 44% and 55% identity with expect values of  $4 \times 10^{-51}$  and  $2 \times 10^{-$   
176 <sup>83</sup>, respectively, and to other ClpP homologs than to its paralog. This observation was supported by  
177 the ability of the anti-Pa\_ClpP1 antibody to recognize Ctr ClpP2 but not Ctr ClpP1 (Fig. 1C). The



178 sequence identity between Ctr ClpP1 and Ctr ClpP2 is 39% with an expect value of  $10^{-44}$ . Similarly,  
179 the two ClpP paralogs of *P. aeruginosa* also share a low amount of similarity to each other compared  
180 to other ClpP homologs via protein alignment (data not shown), and each serves a distinct function  
181 in *P. aeruginosa* (26). Therefore, these observations support the likelihood that the chlamydial ClpP  
182 paralogs have distinct roles.

183 A closer analysis of the chlamydial ClpP paralogs provides further evidence for unique  
184 functionality of each protein. A 3-dimensional predicted structure alignment of Ctr ClpP1 and ClpP2  
185 to *E. coli* ClpP indicates that the structural architecture would allow for homo-oligomer formation  
186 and interaction with unfoldases (Fig. 2B), though distinct differences in the oligomer interface may  
187 prevent hetero-oligomerization (34). Additional variation in structure is mostly limited to the N- and  
188 C-termini, however the catalytic triad active site aligns well for all ClpP homologs analyzed (Fig.  
189 2B&C). Also unique to chlamydial ClpP1 are distinct differences at residues that align to amino  
190 acids critical to activation in other bacteria. An alanine at position 37 of Ctr ClpP1 may result in a  
191 conformational difference in the P1 pre-activation complex that precludes P1/P2 interaction (35),  
192 which may act as a layer of regulation. Further supporting differential regulation is the lack of an  
193 aromatic amino acid at position 57 of ClpP1 that is relatively well-conserved in other ClpP  
194 homologs, suggesting that Ctr ClpP1 enters the “open” conformation differently than Ctr ClpP2.  
195 Given the conserved catalytic residues and the structural similarity of the Ctr ClpP proteins to  
196 homologs from a diverse set of bacteria, we conclude that the chlamydial ClpP proteins are *bona fide*  
197 proteases. However, the predicted structural differences at the termini of the protein and in other key  
198 residues suggests that the chlamydial ClpP proteins (i) do not interact with each other and (ii) have  
199 specialized functions.

200

201 **Overexpression of only inactive ClpP1 negatively affects *C. trachomatis*.** Leveraging recent  
202 advances in chlamydial genetics, we next determined the effect of over-expression of ClpP proteins  
203 in *C. trachomatis*. We designed and constructed plasmids encoding wild-type or inactive mutants of  
204 each *clpP* paralog, fused to a 6xHis tag, under the control of an anhydrotetracycline (aTc)-inducible  
205 promoter (36). We successfully transformed *C. trachomatis* with plasmids encoding either ClpP1  
206 S92A or ClpP2 S98A active site serine mutants that are known to abolish protease activity (See Fig.  
207 2B; (37)) in addition to plasmids encoding either wild type ClpP protein. To assess the effect of  
208 over-expression of both the wild type and the inactive mutant ClpPs, HEp2 cells were infected with  
209 each transformant, and expression was induced at 10hpi with 10 nM aTc. 14-hour pulses were  
210 utilized to determine inclusion morphology at 24hpi. Use of aTc at 10 nM did not alter wild-type  
211 chlamydial inclusion growth (Suppl. Fig. S2; (36)). At that time point, the localization of the ClpP  
212 proteins was within the bacterial cytosol. Over-expression of mutant ClpP1 resulted in noticeably  
213 smaller inclusion sizes after 14h of induction (Fig. 3A) whereas over-expression of inactive ClpP2  
214 had no demonstrable effect (Fig. 3B). Of note is that neither of the wild type chlamydial ClpP  
215 proteins had any apparent negative impact. Further analysis of recoverable inclusion forming units  
216 (IFUs) confirmed the observed reduction in chlamydial viability following ClpP1 S92A  
217 overexpression, with a severe decrease in IFU recovery following a 14h pulse with the aTc inducer  
218 (Fig. 3C). Conversely, ClpP2 S98A or wild-type protein overexpression has no statistical and likely  
219 no biologically significant impact on development. From these data indicate we conclude that over-  
220 expression of ClpP1 S92A is detrimental to chlamydiae. In support of this, we were unable to isolate  
221 a clonal population of purified ClpP1 S92A transformants as we routinely observed small bacterial  
222 populations susceptible to antibiotic selection even after multiple passages. This observation  
223 indicates that leaky expression may drive plasmid loss as has been observed in other chlamydial  
224 transformation systems (38) (39).

225

226 **The ClpP paralogs demonstrate homotypic, but not heterotypic, interactions.** To better  
227 understand the function of each ClpP paralog and why over-expression of ClpP1 S92A, but not  
228 ClpP2 S98A or wild-type proteins, was detrimental to *Chlamydia*, we initiated a series of *in vivo* and  
229 *in vitro* biochemical assays to characterize the properties of the ClpP proteins. Extensive evidence  
230 exists from other bacterial systems to indicate that ClpP forms a tetradecameric complex composed  
231 of two heptameric rings (21-25, 40, 41). To determine whether the chlamydial ClpP paralogs formed  
232 homo- and/or heterooligomers, we first employed the bacterial adenylate cyclase-based two-hybrid  
233 (BACTH) system to detect protein-protein interactions. This *in vivo* assay is based on the  
234 reconstitution of adenylate cyclase activity when two functional fragments of Cya from *B. pertussis*  
235 are brought into close proximity by interacting proteins (42). Interactions can be qualitatively  
236 determined on Xgal plates and quantified by beta-galactosidase activity. Using the BACTH system,  
237 we observed homo-oligomerization of each ClpP paralog, but failed to detect interactions between  
238 ClpP1 and ClpP2 (Fig. 4A&B). Importantly, the active site mutants also interacted with each other  
239 and the wild-type proteins, indicating that this mutation did not interfere with homo-oligomerization  
240 (Fig. 4B). These data are consistent with the predicted structural and sequence differences noted  
241 (Fig. 2B&C).

242 As the BACTH system cannot indicate oligomerization state, we next purified recombinant  
243 chlamydial ClpP1 and ClpP2 (22 and 23 kDa, respectively), including the active site mutants, and  
244 analyzed their migration by native PAGE. As a positive control, we also purified *E. coli* ClpP (24  
245 kDa). Each of the recombinant chlamydial proteins clearly formed a heptamer with a fainter, slower  
246 migrating band indicating potential tetradecamer forms (Fig. 4C). The *E. coli* ClpP, in contrast,  
247 migrated primarily as a tetradecamer with a less intense band at the predicted size of a heptamer. In  
248 purifying Ctr ClpP1, we noticed the presence of a doublet band (Suppl. Fig. S3). However, the N-

249 terminus encodes two additional methionine residues at positions 6 and 7, thus the smaller product  
250 may have resulted from an alternative start site when expressed in *E. coli*. Mass spectrometry  
251 analysis of the N-terminus of each band supported this conclusion (Suppl. Fig. S3). Note that the  
252 BACTH constructs relied on N-terminal fusions such that the alternative start site of ClpP1 would  
253 not be relevant. To ensure that only the larger, full-length recombinant ClpP1 product was produced,  
254 we mutated the methionine residues to leucine and isoleucine. This recombinant ClpP1 (M6L/M7I)  
255 also migrated predominantly as a heptamer in the native PAGE assay (Fig. 4C). Therefore, we  
256 conclude that the smaller product did not alter the oligomerization state of the protein.

257 Both our bioinformatics predictions and the BACTH data indicated that ClpP1 and ClpP2 do  
258 not interact. To further test this, we mixed each recombinant protein in equimolar amounts and  
259 analyzed their oligomerization state by native PAGE. In support of our early observations, we did  
260 not observe heteromers of each ClpP paralog as each protein ran as distinct heptamers with no  
261 intermediate bands indicative of mixing of the monomers (Fig. 4D). However, we can neither  
262 exclude that the *in vitro* conditions preclude an interaction between these components nor that these  
263 paralogs interact *in vivo*. Nevertheless, given the differences in predicted structures at the termini of  
264 each ClpP paralog (Fig. 2) and the different interaction data presented, the parsimonious  
265 interpretation is a model wherein each protease complex functions separately.

266

267 **Chlamydial ClpP1 and ClpP2 vary in protease activity *in vitro*.** To determine the functionality of  
268 the protease complexes, we used the recombinant ClpP proteins to assess their ability to degrade the  
269 small, fluorogenic compound Suc-LY-AMC. The degradation of this compound by other bacterial  
270 ClpP enzymes does not rely on ClpP activation (43), thus we could probe the basal protease activity  
271 of the ClpP paralogs. While ClpP2 degraded the substrate under our given assay conditions, ClpP1  
272 activity could not be detected (Fig. 5A). This result for ClpP1 was not due to the presence of the

273 alternative start site product since the M6L/M7I mutant displayed no activity in this assay. We also  
274 observed enhanced protease activity for ClpP2 in a sodium citrate buffer, as noted by others (44), but  
275 this buffer did not stimulate ClpP1 activity. That ClpP1 lacks the ability to degrade Suc-LY-AMC  
276 suggests the N-terminal region of the complex (Fig. 2) may block entry of even this small reporter  
277 substrate into the active site. Importantly, the activity of the ClpP2 protease was abolished by the  
278 active site serine mutation S98A (Fig. 5A). As a positive control, we also tested the activity of the *E.*  
279 *coli* ClpP complex in our assay conditions and observed degradation of the Suc-LY-AMP compound  
280 that was increased by sodium citrate (Fig. 5B). Thus, in spite of the activity of Ctr ClpP2, it  
281 displayed a significantly less proteolytic capacity *in vitro* compared to the *E. coli* ClpP. The apparent  
282 preference of heptameric formation by both chlamydial ClpP1 and ClpP2 could explain the reduced  
283 activity as compared to the *E. coli* ClpP, which preferentially formed tetradecamers *in vitro*. These  
284 observed differences may suggest that either the assay conditions are not optimal or that *Chlamydiae*  
285 tightly regulate the activity of their ClpP complexes.

286

287 **ClpP-activating antibiotics stimulate protease activity of ClpP2, but not ClpP1 and block**  
288 **chlamydial growth.** Recently, a novel class of antibiotics that target ClpP have been developed (45).  
289 ACP and ADEP derivatives activate ClpP by eliminating or reducing its need for ATPase binding.  
290 The unregulated proteolysis that results has been demonstrated to eliminate persister bacteria (46).  
291 We used these compounds to determine whether the activated chlamydial ClpP proteases could  
292 degrade a more complex substrate, casein. As noted with the Suc-LY-AMP substrate, ClpP1 failed to  
293 degrade casein in the presence of any of the ACP1 derivatives (Fig. 6A). By contrast, the ACP1  
294 compounds stimulated ClpP2 to degrade casein (Fig. 6B), albeit with some detectable substrate  
295 remaining at the end of the assay. As before, the *E. coli* ClpP was more efficient in degrading the  
296 substrate with little to no casein detectable (Fig. 6C; (47)). ClpP2 was thus able to, in the presence of

297 these drugs that relax the N-termini of the complex, degrade larger substrates with intrinsically  
298 disordered regions (i.e. casein). The inability to detect proteolytic activity of ClpP1 again suggests  
299 that the N-terminus of ClpP1 may act as a regulatory block consistent with the differences we  
300 observed in our bioinformatics analysis (Fig. 2). Also consistent with the difference in activation is  
301 the lack of an aromatic amino acid at residue 57 of Ctr ClpP1. This particular residue of the  
302 hydrophobic pocket has recently been shown to be instrumental in ADEP-induced dysregulation of  
303 proteolytic activity, which supports a model where chlamydial ClpP1 is unaffected by activating  
304 drugs (35). However, we cannot exclude that we have not identified the optimal conditions necessary  
305 to demonstrate the enzyme activity of wild-type ClpP1.

306 As we were able to demonstrate the ability of the ACP1 compounds to activate Ctr ClpP2, we  
307 next sought to test the effect of these compounds on *Chlamydia*. To ensure that any effect on the  
308 bacteria was not due to host cell death, we first tested cell viability of infected, ACP-treated HEP2  
309 cells. Indeed, we noted limited loss (~10%) in host cell viability for both 25 and 50 µg/mL  
310 concentrations following 16 hours of drug treatment (Fig. 6D), which reinforces that any loss of  
311 bacterial viability would not be due to a reduction in host cell viability. The ACP drugs all showed a  
312 remarkable impact on *Chlamydia* at both concentrations tested when added at 8hpi and samples were  
313 harvested at 24hpi (Fig. 6E). The lower drug concentration resulted in a 50-fold reduction in  
314 recoverable EBs whereas the higher concentration led to almost complete abrogation of chlamydial  
315 viability. Given the effects of the ACP compounds on ClpP protease activity *in vitro*, these data  
316 suggest that uncoupling of ClpP2 activity from its cognate ATPase strongly inhibits bacterial growth.

317

## 318 Discussion

319 The Clp protease system has been extensively characterized in *E. coli* and *Bacillus subtilis*,  
320 and its importance in the growth and virulence of various pathogens (opportunistic or not) has been

321 examined (see (23) for review). Since the discovery of the ClpP protease (48), interaction studies  
322 demonstrated that the ClpP proteins typically form a tetradecameric stack of two heptamers (49).  
323 The serine active sites are buried within these barrel-like structures (50). ClpP hydrolysis of large  
324 protein substrates is increasingly stimulated in the presence of AAA+ ATPase binding (51).  
325 However, complexed ClpP alone processes small substrates of up to 30 amino acids regardless of the  
326 presence of ATP, suggesting that active site availability and complex accessibility are the two main  
327 mechanisms regulating ClpP activity (52). Substrates that enter this complex by either ATPase-  
328 mediated or ATPase-independent means are hydrolyzed into short peptides of 6-8 amino acids with  
329 some degree of amino acid specificity (53) (44). While not unprecedented, the presence of two  
330 encoded *clpP* paralogs in a bacterial chromosome is unusual. In *P. aeruginosa*, another bacterium  
331 encoding dual ClpP proteases, the two isoforms have not been shown to interact in any test  
332 condition, and the different transcriptional profiles and differential effects on virulence factor  
333 production indicate these paralogs likely have distinct roles in *P. aeruginosa* (26). Conversely, the  
334 two ClpP proteins of *M. tuberculosis* and *L. monocytogenes* heterologously interact as two  
335 homotypic heptamers, which facilitates an increase in function (27, 29, 54). The activation of one  
336 homotypic ClpP heptamer activates the heptamer of the other isoform in *M. tuberculosis*, providing a  
337 novel mechanism for activation (41). Of note is that *L. monocytogenes* ClpP2 may also form a  
338 completely homotypic tetradecamer of one ClpP paralog (55). Again, the Clp proteolytic subunits  
339 play an integral role in virulence factor regulation in addition to enhancement of bacterial survival  
340 during intracellular growth (56). Taken together, these studies demonstrate the diverse function of  
341 dual ClpP peptidase systems in the pathogenesis and growth of various bacteria.

342 The work presented here to characterize the ClpP paralogs is the first to explore the function  
343 and role of the Clp protease system in *C. trachomatis*. Our results suggest that the two ClpP  
344 proteases likely serve distinct roles in chlamydial physiology and, we hypothesize, in the complex

345 developmental cycle of this organism. We utilized bioinformatics techniques as an initial approach to  
346 investigate the potential function of the ClpP proteins. We observed significant similarity of the  
347 chlamydial ClpP paralogs to ClpP homologs of more studied organisms such as *E. coli*. In support of  
348 this, most of the hallmark conserved residues, including the active site triad, are present in the  
349 chlamydial ClpP paralogs. Both ClpP1 and ClpP2 have hydrophobic residues aligned with those of  
350 other bacterial ClpPs, suggesting the presence of AAA+ adaptor protein docking sites (57). Indeed,  
351 chlamydial ClpC and ClpX encode the evolutionarily retained IGF/L loop motifs that facilitate  
352 interaction with the ClpP tetradecameric complex (unpublished observation) (41). In spite of the  
353 similarities between the ClpP paralogs, there are also notable differences. The C-termini of both  
354 chlamydial ClpPs contain two residues that comprise the hydrophobic pocket (47, 58), but the  
355 alignment shows the presence of charged residues (D15, K40, K41, and D66) in ClpP1 while the  
356 conserved residues appear to be uncharged. In addition, ClpP1 lacks a highly conserved tyrosine  
357 residue (D15), a conserved glutamine (A36), and a conserved aromatic residue (V57), all of which  
358 contribute to canonical activation and tetradecamer chamber access for other homologs (35).  
359 Ongoing studies are investigating these residues in addition to others that are involved in complex  
360 activation. Of note is the predicted alpha helix at the N-terminus of ClpP1 and the C-terminus of  
361 ClpP2, which may contribute to some form of steric hindrance to prevent interaction between ClpP1  
362 and ClpP2 (59). Indeed, we did not detect an interaction between ClpP1 and ClpP2 using both *in*  
363 *vivo* and *in vitro* techniques. Rather, we detected only homooligomers. While our *in vitro* assays  
364 have failed to show P1/P2 complex formation, we cannot rule out the possibility of protein  
365 modification promoting heteromers *in vivo*. Further studies examining the role of the N- and C-  
366 termini will be conducted to determine whether or not they play a role in complex formation and/or  
367 specificity.



368           Given the role of the N-terminal regions in regulation of the ClpP protease via reduced access  
369 into the proteolytic complex (60), the hypothesis of a difference in interaction or regulation of the  
370 ClpP complexes in *C. trachomatis* is reasonable based on the data presented here. We detected  
371 ClpP2 protease activity against both a small oligopeptide substrate and the more complex casein  
372 substrate. However, we did not detect proteolytic activity of ClpP1 *in vitro*, even in the presence of  
373 well-characterized drugs that activate ClpP complexes in the absence of an ATPase, which agrees  
374 with an important and highly regulated role for ClpP1 in *C. trachomatis*. The structural conservation  
375 and presence of the catalytic active site makes it unlikely that ClpP1 is a catalytically inactive  
376 protease. Rather, some form of modification or conformational change in structure, possibly  
377 chaperone or adaptor mediated, may be necessary to promote full complex formation and activity  
378 both *in vitro* and *in vivo*. In this model, an unknown regulatory factor may modulate ClpP1 activity.  
379 In a manner consistent with our bioinformatics data, ClpP1 may be activated non-canonically, as the  
380 mechanism needed to open the channel at the V57 residue is likely different than those targeting the  
381 aromatic amino acids present in other homologs. We are investigating this and other possibilities.

382           Our data lead us to hypothesize that each ClpP protein in *Chlamydia* forms a separate  
383 protease complex and, therefore, serves a different function. Whether each ClpP interacts  
384 specifically with ClpX or ClpC remains to be determined. However, the genomic proximity of ClpP2  
385 to ClpX suggests a likely interaction with ClpX by sequestration immediately following translation;  
386 thus, we speculate that ClpP1 likely interacts preferentially with ClpC. Our qPCR and western blot  
387 data suggest that the *clpX*-encoding gene follows the *clpP2*-encoding gene in an operon, further  
388 supporting coupled function and an *in vivo* complex of ClpP2 and ClpX oligomers. Complex  
389 formation is currently under investigation as is what role each complex has *in vivo*. It is also possible  
390 that ClpP tetradecamers may function independently *in vivo* in a housekeeping role to degrade small  
391 oligopeptides resulting from degradation of larger proteins and/or import from the host cell.

392 *Chlamydiae* encode a large repertoire of oligopeptide transporters, and the short peptide substrates  
393 are an important source of nutrients, particularly early during infection (61).

394 We were able to transform *C. trachomatis* with plasmids encoding either wild type or mutant  
395 ClpP1 or ClpP2. Overexpression of either wild type protein had seemingly little negative effect on  
396 growth and morphology, which strengthens a scenario where these proteins are tightly regulated and  
397 exhibit little function without a cognate ATPase. The tolerance of *C. trachomatis* to wild type ClpP1  
398 and ClpP2 overexpression suggests that this system resists AAA+ ATPase saturation with an  
399 overabundance of either proteolytic subunit. Given the reduced tendency for either ClpP to form a  
400 tetradecamer, excess ClpP1 or ClpP2 beyond what is needed for homeostasis may also remain in a  
401 functionally inactive heptameric form unless recruited by an unfoldase. Interestingly, overexpression  
402 of the inactive ClpP mutants in *Chlamydia* resulted in differential effects on chlamydial growth and  
403 morphology. ClpP2(S98A) has, even upon the highest level of induction, little negative effect on  
404 inclusion morphology. Incorporation of inactive forms of ClpP2 (activity loss confirmed *in vitro*,  
405 Figure 5B) into the tetradecameric oligomer is not necessarily harmful to *C. trachomatis*. The ability  
406 of ClpP2 to degrade a small peptide reporter (Fig. 5A) is in congruence with a model where an  
407 unfoldase-independent ClpP2 tetradecamer targets and degrades imported peptides. Given that  
408 overexpression of inactive ClpP2 seems to have limited negative impact on chlamydial development,  
409 an inactive ClpP2 oligomer may bind small peptides, preventing extensive targeting of other, more  
410 vital substrates and negating any dominant negative effect. Conversely, overexpression of  
411 ClpP1(S92A) and its incorporation into the endogenous ClpP1 proteolytic machinery has a clear  
412 negative impact on *C. trachomatis*. Because overexpression of wild-type ClpP1 has no obvious  
413 negative effect, that inactive ClpP1 overexpression reduces chlamydial viability may mean that fully  
414 functional operation of ClpP1 is essential to the bacteria. The adverse effect observed may also  
415 suggest that ClpP1 has a limited reserve of unique adaptors that we have not yet identified and that

416 production of an inactive ClpP1 complex titers out these adaptors and reduces function to the point  
417 of harm to the bacteria. We observed that the mutant ClpP proteins interacted with the wild-type  
418 proteins in the BACTH assay (Fig. 4B), suggesting the potential of the inactive proteins to form  
419 complexes with the endogenous proteins. Overall, these data suggest that, should each mutant  
420 protein oligomerize with endogenous wild-type protein *in vivo*, subunit poisoning of the ClpP1  
421 complex is deleterious to chlamydiae whereas the ClpP2 complex is more tolerant.

422 We hypothesize that proteolytic Clp subunit regulation by a chaperone protein is vital to  
423 chlamydial survival. Based on our studies with the ACP1 antibiotics, our assays showed that ClpP2  
424 acts in a manner similar to other well-characterized ClpP proteases when artificially activated by  
425 these compounds (Fig. 6A, C). Consequently, treatment of *Chlamydia*-infected cells with ACP1 (or  
426 one of its derivatives) significantly and drastically reduced chlamydial growth (Fig. 6E), which we  
427 speculate is due to the effects on ClpP2 function. Whether the negative effect stems from  
428 dysregulation of ClpP2 leading to uncontrolled proteolysis, which is supported by the *in vitro*  
429 degradation of casein, or from blocking of ClpP2/AAA+ ATPase complex formation, resulting in the  
430 inability to degrade larger substrates not accessible to ClpP2 alone, is currently under investigation.  
431 In spite of the inability of ClpP2(S98A) overexpression to significantly impact chlamydial growth,  
432 the antibiotics data suggest that disruption of ClpP2 via dysregulation of activity is overwhelmingly  
433 negative to chlamydial development. However, we cannot exclude a possible effect of these  
434 antibiotics on ClpP1 *in vivo*. Clearly, overexpression of ClpP1(S92A) was deleterious to chlamydial  
435 growth, thus each ClpP paralog is essential to normal growth and development.

436 We have shown here an initial characterization of the chlamydial Clp protease system  
437 focusing on the ClpP protease components. Overall, the sensitivity of the organisms to perturbations  
438 in ClpP activity suggests a critical function for these paralogs in maintenance of chlamydial  
439 physiology. We speculate that these systems will also play an integral role in differentiation and

440 possibly persistence (62) (63), which may provide a mechanism that could be leveraged to block  
441 growth or eliminate persister cells (46). Further characterization of the chlamydial Clp system could  
442 facilitate development of targeted therapeutics for treatment of *C. trachomatis* infection, thereby  
443 lowering dependence on broad-spectrum antibiotics. Ongoing efforts are investigating this  
444 hypothesis as well as the function of the AAA+ unfoldases.

445

## 446 **Materials and Methods**

447 **Strains and Cell Culture:** The human epithelial cell line HEP2 was utilized in the transcriptional and  
448 antibiotic studies and was routinely cultivated and passaged in Iscove's Modified Dulbecco's  
449 Medium (IMDM, Gibco/ThermoFisher; Waltham, MA), and 10% FBS (Sigma; St. Louis, MO).  
450 McCoy mouse fibroblasts were used for the purpose of chlamydial transformation, and human  
451 epithelial HeLa cells were used for plaque purification of the resulting chlamydial transformants as  
452 well as for protein isolation and assessment of ClpP2 expression. All of these cell lines were  
453 passaged routinely in Dulbecco's Modified Eagle's Medium (DMEM, Gibco/ThermoFisher).  
454 Density gradient purified *Chlamydia trachomatis* L2/434/Bu (ATCC VR902B) EBs were used for  
455 the antibiotic studies. *C. trachomatis* serovar L2 EBs (25667R) naturally lacking the endogenous  
456 plasmid were prepared and used for transformation [see (64)].

457

## 458 **Transcript Analysis Using RT-qPCR:**

459 HEP2 cells seeded in 6-well plates were infected at a multiplicity of infection of 1 with *C.*  
460 *trachomatis* serovar L2. At the indicated times post-infection, total RNA and DNA were collected  
461 from duplicate wells (63). Briefly, total RNA was collected from infected cells using Trizol reagent,  
462 extracted with chloroform, and the aqueous phase precipitated with an equal volume of isopropanol  
463 according to the manufacturer's instructions (ThermoFisher). DNA was removed from total RNA by

464 rigorous DNase-free treatment (ThermoFisher) before 1  $\mu$ g was reverse transcribed with Superscript  
465 III RT (ThermoFisher). Equal volumes of cDNA were used for qPCR. Total DNA was collected  
466 from infected cells by trypsinizing the cells, pelleting for 5 min at 400 xg, and resuspending in PBS.  
467 Samples were freeze-thawed three times before processing with the DNeasy Blood and Tissue kit  
468 according to the manufacturer's instructions (Qiagen). 150 ng of total DNA were used for qPCR.  
469 Transcripts and genomic DNA were quantified by qPCR in 25  $\mu$ L reactions using 2x SYBR Green  
470 Master Mix in an ABI7300 thermal cycler in comparison to a standard curve generated from purified  
471 *C. trachomatis* L2 genomic DNA. Transcripts were normalized to genomic DNA.

472

473 ***C. trachomatis* propagation and detection of Clp proteins:** DFCT28, a GFP-expressing *C.*  
474 *trachomatis* 434/Bu clone (65), was routinely grown in and titered (using the IFU assay) on HeLa  
475 cells (66). Briefly, cells were maintained in Dulbecco's modified Eagle medium (DMEM)  
476 supplemented with 10% fetal bovine serum (FBS) and grown at 37 °C with 5% CO<sub>2</sub>. For chlamydial  
477 infection experiments, HeLa cells were grown until confluent in 6-well tissue culture dishes and then  
478 infected with DFCT28 at an MOI of ~3 using centrifugation at 545 xg for one hour. The infected  
479 cells were then incubated at 37 °C with 5% CO<sub>2</sub> with DMEM/FBS supplemented with 0.2  $\mu$ g/mL  
480 cycloheximide and 1x non-essential amino acids. At various times post infection, the medium was  
481 removed, cells were washed twice with 2 ml of PBS, and cells were lysed via addition of 200  $\mu$ L  
482 Laemmli buffer with  $\beta$ -mercaptoethanol followed by heating at 90-100 °C for 5 minutes. Chlamydial  
483 protein samples or purified, recombinant ClpP samples were run on 12% SDS-PAGE gels and either  
484 stained for total protein with Coomassie Brilliant Blue or transferred to nitrocellulose for western  
485 blotting. Blots were probed with a rabbit polyclonal anti-Pa\_ClpP1 (*Pseudomonas aeruginosa*  
486 designation, similar to ClpP2 from *C. trachomatis*) diluted 1:10000 in 5% milk Tris-buffered saline  
487 (mTBS) or anti-Pa\_Clp2 (*Pseudomonas aeruginosa* designation, similar to ClpP1 from *C.*

488 *trachomatis*) at 1:2500. The antibodies were kindly provided by Dr. T. Baker (Massachusetts  
489 Institute of Technology) (26). Mouse polyclonal antibodies against chlamydial ClpP1, ClpC, and  
490 ClpX (kind gift of Dr. G. Zhong, University of Texas Health Sciences Center at San Antonio) were  
491 diluted 1:2000 in mTBS. After incubating with primary antibodies, blots were washed with Tween  
492 (0.5%)-TBS (TTBS) and then probed with a goat, anti-rabbit IgG poly-HRP conjugated secondary  
493 antibody (Thermo Scientific 32260) diluted 1:1000 in mTBS or goat anti-mouse IgG HRP  
494 conjugated secondary antibody (Millipore AP124P) diluted 1:2000 in mTBS. As a control for  
495 chlamydial protein, blots were also probed for the major outer membrane protein (MOMP) using a  
496 mouse monoclonal anti-MOMP antibody (1:1000; Abcam, ab41193) and a goat anti-mouse IgG  
497 HRP conjugated secondary antibody as above. After incubation with the secondary antibodies, blots  
498 were washed with TTBS followed by TBS and then incubated with chemiluminescent substrate  
499 (EMD Millipore Immobilon ECL) for imaging on a Bio-Rad Chemidoc MP.

500

501 **Bioinformatics Analysis:** Gene maps and sequences of genes of *Chlamydia trachomatis* used were  
502 obtained from STDGen database (<http://stdgen.northwestern.edu>). RefSeq protein sequences from *E.*  
503 *coli*, *B. subtilis*, *M. tuberculosis*, and *P. aeruginosa* were acquired from the NCBI protein database  
504 (<https://www.ncbi.nlm.nih.gov/guide/proteins/>). The ClpP1 vs. ClpP2 protein alignment to find  
505 sequence identity was performed using NCBI Protein BLAST function  
506 (<https://blast.ncbi.nlm.nih.gov/Blast.cgi>) (67). Multiple sequence alignments were performed using  
507 Clustal Omega (68) with default settings and were presented using Jalview Version 2 (69). PDB files  
508 for predicted 3D structures were acquired from the Phyre2 website  
509 (<http://www.sbg.bio.ic.ac.uk/phyre2/html/page.cgi?id=index>) (70). Protein models and model  
510 alignments were rendered using the UCSF Chimera package from the Computer Graphics  
511 Laboratory, University of California, San Francisco (supported by NIH P41 RR-01081) (71).

512

513 **Plasmid Construction:** A full list of the primers and plasmids used is included in the supplementary  
514 material (S1). Plasmids for the Bacterial Adenylate Cyclase Two-Hybrid (BACTH) system were  
515 cloned using the Gateway® recombination system (72). The genes were amplified from *Chlamydia*  
516 *trachomatis* L2 genomic DNA with primers designed to add an *attB* recombination site on either side  
517 of the gene. The PCR products were then incubated with a pDONR™221 entry vector (containing  
518 *attP* recombination sites) in the presence of BP Clonase II (Invitrogen) that inserts the gene via the  
519 flanking *attB* sites and removes *ccdB* endotoxin flanked by the *attP* sites encoded on the plasmid,  
520 allowing for positive selection. The result of the BP reaction was an entry vector containing the gene  
521 of interest flanked by *attL* sites. 2 µL were transformed into DH5α chemically competent *E. coli* and  
522 plated onto an LB agar plate containing 50 µg/mL kanamycin. Plasmid from an individual colony  
523 was purified and used for the LR reaction into one of three destination vectors (pST25-DEST,  
524 pSNT25-DEST, or pUT18C-DEST). The same entry vector for any given gene was used for all three  
525 LR reactions to insert into the destination vector with LR Clonase II. 150 ng of the entry vector was  
526 incubated with 150ng of destination vector for 1 hour at room temperature. 2 µL were used to  
527 transform XL1 *E. coli*, which were plated on the appropriate selection plate. Purified plasmid from  
528 an individual colony was sequence verified prior to use the in BACTH assay (see below).

529         Constructs for chlamydial transformation were created using the HiFi Cloning (New England  
530 Biolabs) protocol. To add the C-terminal 6xHis tag to the Clp proteins, the genes were amplified  
531 from the genome with a primer to add the poly-histidine tag. These products served as the template  
532 for PCR reactions to add the necessary overlap for the HiFi reaction. Primers were generated using  
533 the NEBuilder® assembly tool available from New England BioLabs (<http://nebuilder.neb.com>). The  
534 backbone used was the pTLR2 derivative of the pASK plasmid (36). The pTLR2 backbone was  
535 digested using FastDigest BshTI and Eco52I restriction enzymes and dephosphorylated using

536 FastAP (ThermoFisher), and then 25ng of digested plasmid was incubated with a 2:1 ratio of insert  
537 copy number to backbone and 2x HiFi master mix (NEB). Following a 15 minute incubation of the  
538 reaction mix at 50° C, 2 µL of the reaction was transformed into DH5α chemically competent *E. coli*  
539 (NEB) and plated on the appropriate antibiotic selection plate. Positive clone sequences were  
540 verified by Eurofins Genomics. Sequence verified plasmids were transformed into *dam-/dcm-* *E. coli*  
541 (New England BioLabs) in order to produce demethylated plasmid, which was sequence and digest  
542 verified prior to transformation into *C. trachomatis* (see below).

543         Strains created or used in this study are listed in the supplementary material. *E. coli* strains  
544 were maintained on LB agar plates and grown in LB medium or on LB agar plates supplemented  
545 with 100 µg/ml ampicillin as needed. Chlamydial genomic DNA for cloning was obtained from EBs  
546 using a phenol:chloroform extraction after extensive heat treatment in the presence of proteinase K  
547 (73), and *E. coli* genomic DNA was isolated using sodium hydroxide lysis of colonies. The  
548 chlamydial *clpP1* and *clpP2* along with *clpP* from *E. coli* were amplified via PCR using the primers  
549 listed in Supplemental Information and Phusion DNA polymerase (Thermo Scientific). PCR  
550 products were cloned into the pLATE31 expression vector from Thermo Scientific as directed by the  
551 manufacturer to create fusion proteins with a C-terminal 6x His-tag. Plasmids were initially  
552 transformed into *E. coli* NEB10 and selected on LB agar ampicillin plates. Transformants were  
553 screened for inserts using colony PCR with Fermentas Master Mix (Thermo Scientific) and positive  
554 clones were grown for plasmid isolation (GeneJet Plasmid Miniprep Kit, Thermo Scientific). DNA  
555 inserts were sequenced by Macrogen USA and sequence-verified plasmids were then transformed  
556 into *E. coli* BL21(DE3) bacteria for protein production.

557

558 ***Chlamydial Transformation:*** The protocol followed was a modification of the method developed by  
559 Mueller and Fields (74). For transformation, 10<sup>6</sup> *C. trachomatis* serovar L2 EBs (25667R) naturally



560 lacking the endogenous plasmid were incubated with 2  $\mu$ g of unmethylated plasmid in a volume of  
561 50  $\mu$ L CaCl<sub>2</sub> at room temperature for 30 minutes. Each reaction was sufficient for a confluent  
562 monolayer of McCoy cells in one well of a six well plate that had been plated a day prior. The  
563 transformants were added to a 1 mL overlay of room temperature HBSS per well, and an additional 1  
564 mL of HBSS was then added to each well. The plate was centrifuged at 400 xg for 15 min at room  
565 temperature, where the beginning of this step was recorded as the time of infection. Following the  
566 spin, the plate was incubated for 15 minutes at 37° C. This infection was recorded as T<sub>0</sub>. The  
567 inoculum was aspirated at the end of the incubation and replaced with antibiotic-free DMEM+10%  
568 FBS. 8 hours post-infection, the media was replaced with DMEM containing 1  $\mu$ g/mL  
569 cycloheximide, 10  $\mu$ g/mL gentamicin, and 1 U/mL penicillin. Cells infected with transformants were  
570 passaged every 48 hours until a population of penicillin resistant bacteria was established. These EBs  
571 were then harvested and frozen in sucrose/phosphate (2SP; (64)) solution at -80° C prior to titration.

572

573 ***Determining the Effect of Overexpression of Wild Type and Mutant Clp Proteins via***  
574 ***Immunofluorescence and Inclusion Forming Unit Analysis:*** Transformed *C. trachomatis*  
575 containing a mutant *clp* gene under control of an anhydrotetracycline (aTc) inducible promoter was  
576 used to infect a monolayer of HEP2 cells on coverslips with penicillin as a selection agent. Samples  
577 were induced with increasing, subtoxic amounts of aTc at 10 hours post-infection (hpi) and were  
578 methanol fixed after a 14 hour pulse (24 hpi). Fixed cells were incubated with an anti-Ctr serovar L2  
579 guinea pig primary antibody (kindly provided by Dr. Rucks, UNMC) to stain for the organism and a  
580 goat anti-guinea pig Alexa488 conjugated secondary antibody for visualization of organisms within  
581 the inclusion. Additionally, a mouse anti-6xHis tag was used, followed by a goat anti-mouse  
582 Alexa594 secondary antibody for confirmation of protein expression and localization. Finally, the  
583 samples were stained with DAPI to visualize the host cell and bacterial DNA. Representative images

584 were taken on a Zeiss LSM 800 laser scanning confocal microscope with a 60x objective and 3x  
585 digital zoom and were equally color corrected using Adobe Photoshop CC. To assess the effect of  
586 wild type and inactive Clp mutant overexpression via the Inclusion Forming Unit (IFU) assay, HEp2  
587 monolayers were infected as described above. At 10hpi, samples either were or were not induced  
588 with a 10 nM aTc concentration. Infections were allowed to proceed for another 14h (24hpi) prior to  
589 harvest. To harvest IFUs, sample wells were scraped in 2SP and lysed by vortexing with three 1mm  
590 glass beads for 45s. Samples were serially diluted in 2SP and titrated in duplicate directly onto a new  
591 monolayer of HEp2 cells. Following a 24h incubation, the samples were fixed and stained with an  
592 anti-Ctr serovar L2 guinea pig primary and Alexa488 secondary. 15 fields of view were counted for  
593 each duplicate well, giving a total of 30 fields of view per experiment. Three independent replicates  
594 were performed, and the totals for each experiment were averaged. Values were expressed as a  
595 percentage of the uninduced sample to provide an internal control. A Student's two-tailed t test to  
596 compare the induced samples to the uninduced control was performed using the averages of each  
597 biological replicate. An asterisk (\*) indicates  $P < 0.05$ , N.S. indicates  $P > 0.05$ .

598

599 ***Determining Protein-Protein Interactions with the BACTH System:*** To test interaction of the Clp  
600 proteins, the Bacterial Adenylate Cyclase Two-Hybrid (BACTH) assay was utilized. This assay  
601 relies on reconstitution of adenylate cyclase activity in adenylate cyclase deficient ( $\Delta cya$ ) DHT1 *E.*  
602 *coli*. The genes of interest are translationally fused to one of either subunit, denoted as T18 and T25,  
603 of the *B. pertussis* adenylate cyclase toxin. Each wild-type or mutant *clpP* gene cloned into one of  
604 the pST25, pSNT25, or pUT18C Gateway<sup>®</sup> vectors was tested for both homotypic and heterotypic  
605 interactions (10). One plasmid from the T25 background and one from the T18 background were co-  
606 transformed into the DHT1  $\text{CaCl}_2$  competent *E. coli* and were plated on a double antibiotic minimal  
607 M63 medium selection plate supplemented with 0.5 mM IPTG for induction of the protein, 40

608  $\mu\text{g/mL}$  Xgal to give a visual readout upon cleavage, and 0.2% maltose as a unique carbon source.  
609 These plates also contain 0.04% casein hydrolysate to supplement the bacteria with the branched  
610 chain amino acids as  $\Delta\text{cya DHT1 E. coli}$  cannot synthesize these amino acids. Blue colonies were  
611 indicative of positive interaction between proteins since both the *lac* and *mal* operons require  
612 reconstituted cAMP production from interacting T25 and T18 fragments to be expressed. Leucine  
613 zipper motifs were used for controls in pKT25 and pUT18C backgrounds on the appropriate  
614 antibiotic selection plates because these have been previously shown to interact (75).  $\beta$ -galactosidase  
615 activity was then measured from 8 colonies to quantify protein interactions. Random positive  
616 colonies were used to inoculate individual wells and grown 24 hours at 30° in M63 with 0.2%  
617 maltose and appropriate antibiotics. These bacteria were permeabilized with 0.1% SDS and  
618 chloroform prior to addition of 0.1% o-nitrophenol- $\beta$ -galactoside (ONPG). The reaction was stopped  
619 using 1 M  $\text{NaHCO}_3$  after precisely 20 minutes of incubation at room temperature. Absorbance at the  
620 405 wavelength was recorded and normalized to bacterial growth ( $\text{OD}_{600}$ ), dilution factor, and time  
621 (in minutes) of incubation prior to stopping the reaction. Totals were reported in relative units (RU)  
622 of  $\beta$ -galactosidase activity.

623

624 ***Purification of Recombinant wild-type and mutant ClpP proteins:*** His-tagged Ctr ClpP1, Ctr  
625 ClpP1(S92A), Ctr ClpP1(M6L/M7I), Ctr ClpP2, Ctr ClpP2 (S98A), and Ec ClpP were purified from  
626 500 mL cultures of BL21(DE3) *E. coli* transformed with the respective plasmid based on the  
627 protocol described in (76). Samples were induced with 0.5 mM IPTG and incubated with shaking for  
628 20 hours at 18°C. Cultures were pelleted and frozen at -20°C prior to purifications. Buffers used are  
629 listed in Table S2. Samples were suspended, sonicated, bound to HisPur Cobalt Resin (Thermo  
630 Scientific), and washed in buffer A. Proteins were eluted from the resin using buffer B. Buffer  
631 exchange for buffer C was performed using a Millipore Amicon Ultra 15 filtration units (3 kDa cut-

632 off). ClpP proteins were quantified using the Bio-Rad Protein assay, assessed for purity on 12%  
633 SDS-PAGE gels with Coomassie staining, and identified using anti-His-tag western blot. Blotting  
634 was performed using a mouse monoclonal anti-6x His antibody (1:1000; Millipore HIS.H8) and a  
635 goat anti-mouse IgG HRP conjugated secondary antibody (1:2000). Protein samples were aliquoted  
636 and stored at -80°C.

637

638 **In Vitro Analysis of ClpP Homo-Oligomerization:** 5 µg of purified protein was incubated in buffer  
639 D at 37°C for 1 hour before being mixed with a 5x native sample buffer (5 mM Tris [pH 6.8], 38  
640 mM glycine, 0.06% bromophenol blue) and analyzed on a BioRad MiniProtean 4-20% gradient gel  
641 for Native-PAGE. Samples were run for 90 minutes at 200V. Gels were assessed using Coomassie  
642 staining.

643

644 **Assessment of ClpP activity in vitro.** Fluorometric peptide assay: The ClpPs (at 1 µM monomeric  
645 concentration) were added to 500 µM of Suc-Luc-Tyr-AMC (Boston Biochem) dissolved in buffer E  
646 (50 mM Tris-HCl [pH 8], 200 mM KCl, and 1 mM DTT) or buffer F (with 0.2 M sodium citrate)  
647 (44). Final reaction volumes were 50 µl. Reactions were monitored over six hours at 37 °C using a  
648 BioTek Synergy HT plate reader set at an excitation of 340/360 and an emission of 440/460 with  
649 readings taken at five-minute intervals. Casein degradation assays: Casein (Sigma-Aldrich) was  
650 dissolved in buffer E and 1 µg was used per assay. Samples containing casein and 1 µM of the  
651 respective ClpP monomer were incubated at 37 °C for 3 hours with or without the respective ACP  
652 compound (500 µM). Reactions were halted by mixing with 2x Laemmli buffer containing β-  
653 mercaptoethanol and heating at 90-100 °C for 5 minutes. Samples were analyzed for digestion of  
654 casein using 12% SDS-PAGE gels followed by Coomassie staining.

655

656 ***Effect of ACP compounds on chlamydial growth and host cell viability.*** Antibiotic stocks of ACP1,  
657 ACP1a, and ACP1b were synthesized as described (47), resuspended at 25 mg/mL in DMSO, and  
658 frozen at -20°C in aliquots to avoid freeze-thawing. Methods for the synthesis, purification, and  
659 analysis of these compounds is available in Supplementary Information. For assessment of cell  
660 viability upon treatment, four wells of a 96-well plate with a confluent monolayer of HEp2 cells  
661 were either infected with density gradient purified wild type *C. trachomatis* serovar L2 with an MOI  
662 of 1 or left uninfected. These wells were either treated or not with 25 or 50 µg/mL of ACP1, ACP1a,  
663 or ACP1b, with a set of DMSO only samples used as a control. Antibiotics were added eight hours  
664 post-infection (hpi). At 24 hpi, 100 µL of 2x Resazurin (Abcam) was added to three wells of each  
665 treatment condition, adding only DMEM to the fourth as a background control. Following a four-  
666 hour incubation at 37° C, absorbance at the 570 nm wavelength was recorded using a Tecan plate  
667 reader. The wells were averaged, subtracting background absorbance from samples without dye.  
668 Absorbance was reported as percentage of the untreated samples. To quantify the effect of the drug  
669 on *C. trachomatis*, variable treatments of each drug (25 µg and 50 µg) were added or not eight hours  
670 post-infection. Cell lysates containing *C. trachomatis* were collected in 2SP and frozen at -80° C  
671 prior to serial titration on a fresh cell layer. Inclusion forming units (IFUs), a proxy for recoverable  
672 EBs from the initial infection samples, were calculated from the average number of inclusions in 15  
673 fields of view multiplied by the number of fields of view within the well and corrected for the  
674 dilution factor and volume of inoculum.

675

## 676 **Acknowledgements**

677 We would like to thank Dr. Elizabeth Rucks of UNMC for providing us with antibodies for  
678 analysis by immunofluorescence and for thoughtful review of the manuscript. We thank Dr. Walid  
679 Houry (Univ. of Toronto) for providing us with an initial sample of the ACP1b antibiotic, Dr. Tania

680 Baker (MIT) for providing us with Pa\_ClpP specific antibodies for use in our experiments, Dr.  
681 Gaungming Zhong (UT San Antonio), and Dr. H. Caldwell (NIH/NIAID) for eukaryotic cell lines.  
682 Funding for this project was supported by an NSF CAREER award (1810599) to SPO and  
683 University funds to DJF. This project was also funded by the Department of Defense office of the  
684 Congressionally Directed Medical Research Programs (CDMRP), 2017 Peer Reviewed Medical  
685 Research Program (PRMRP) Discovery Award (PR172445) to MCS. Support for the UNMC  
686 Advanced Microscopy Core Facility was provided by the Nebraska Research Initiative, the Fred and  
687 Pamela Buffett Cancer Center Support Grant (P30CA036727) and an Institutional Development  
688 Award (IDeA) from the NIGMS/NIH (P30GM106397).

689 References:

690

- 691 1. WHO. 2017. Trachoma. <http://www.who.int/mediacentre/factsheets/fs382/en/>. Accessed
- 692 2. Hafner LM, Wilson DP, Timms P. 2014. Development status and future prospects for a  
693 vaccine against *Chlamydia trachomatis* infection. *Vaccine* 32:1563-1571.
- 694 3. CDC. 2017. 2017 Sexually Transmitted Diseases Surveillance.  
695 <https://www.cdc.gov/std/stats16/chlamydia.htm#foot-1>. Accessed
- 696 4. AbdelRahman YM, Belland RJ. 2006. The chlamydial developmental cycle. *FEMS*  
697 *Microbiology Reviews* 29:949-959.
- 698 5. Hackstadt T, Baehr W, Ying Y. 1991. *Chlamydia trachomatis* developmentally regulated  
699 protein is homologous to eukaryotic histone H1. *Proceedings of the National Academy of*  
700 *Sciences of the United States of America* 88:3937-3941.
- 701 6. Hatch TP, Allan I, Pearce JH. 1984. Structural and polypeptide differences between  
702 envelopes of infective and reproductive life cycle forms of *Chlamydia* spp. *Journal of*  
703 *Bacteriology* 157:13-20.
- 704 7. Clifton DR, Fields KA, Grieshaber SS, Dooley CA, Fischer ER, Mead DJ, Carabeo RA,  
705 Hackstadt T. 2004. A chlamydial type III translocated protein is tyrosine-phosphorylated at  
706 the site of entry and associated with recruitment of actin. *Proceedings of the National*  
707 *Academy of Sciences of the United States of America* 101:10166.
- 708 8. Lane BJ, Mutchler C, Al Khodor S, Grieshaber SS, Carabeo RA. 2008. Chlamydial Entry  
709 Involves TARP Binding of Guanine Nucleotide Exchange Factors. *PLoS Pathogens*  
710 4:e1000014.
- 711 9. Hodinka RL, Davis CH, Choong J, Wyrick PB. 1988. Ultrastructural study of endocytosis of  
712 *Chlamydia trachomatis* by McCoy cells. *Infection and Immunity* 56:1456-1463.

- 713 10. Moore ER, Ouellette SP. 2014. Reconceptualizing the chlamydial inclusion as a pathogen-  
714 specified parasitic organelle: an expanded role for Inc proteins. *Frontiers in Cellular and*  
715 *Infection Microbiology* 4:157.
- 716 11. Belland RJ, Zhong G, Crane DD, Hogan D, Sturdevant D, Sharma J, Beatty WL, Caldwell  
717 HD. 2003. Genomic transcriptional profiling of the developmental cycle of *Chlamydia*  
718 *trachomatis*. *Proceedings of the National Academy of Sciences of the United States of*  
719 *America* 100:8478-8483.
- 720 12. Vandahl BBS, Birkelund S, Christiansen G. 2004. Genome and proteome analysis of  
721 *Chlamydia*. *PROTEOMICS* 4:2831-2842.
- 722 13. Skipp PJS, Hughes C, McKenna T, Edwards R, Langridge J, Thomson NR, Clarke IN. 2016.  
723 *Quantitative Proteomics of the Infectious and Replicative Forms of Chlamydia trachomatis.*  
724 *PLoS ONE* 11:e0149011.
- 725 14. Saka HA, Thompson JW, Chen Y-S, Kumar Y, Dubois LG, Moseley MA, Valdivia RH.  
726 2011. Quantitative proteomics reveals metabolic and pathogenic properties of *Chlamydia*  
727 *trachomatis* developmental forms. *Molecular Microbiology* 82:1185-1203.
- 728 15. Beatty WL, Byrne GI, Morrison RP. 1993. Morphologic and antigenic characterization of  
729 interferon gamma-mediated persistent *Chlamydia trachomatis* infection in vitro. *Proceedings*  
730 *of the National Academy of Sciences of the United States of America* 90:3998-4002.
- 731 16. Raulston JE. 1997. Response of *Chlamydia trachomatis* serovar E to iron restriction in vitro  
732 and evidence for iron-regulated chlamydial proteins. *Infection and Immunity* 65:4539-4547.
- 733 17. Matsumoto A, Manire GP. 1970. Electron Microscopic Observations on the Effects of  
734 Penicillin on the Morphology of *Chlamydia psittaci*. *Journal of Bacteriology* 101:278-285.



- 735 18. Stephens RS, Kalman S, Lammel C, Fan J, Marathe R, Aravind L, Mitchell W, Olinger L,  
736 Tatusov RL, Zhao Q, Koonin EV, Davis RW. 1998. Genome Sequence of an Obligate  
737 Intracellular Pathogen of Humans: *Chlamydia trachomatis*. *Science* 282:754.
- 738 19. Stinson BM, Nager AR, Glynn SE, Schmitz KR, Baker TA, Sauer RT. 2013. Nucleotide  
739 binding and conformational switching in the hexameric ring of a AAA+ machine. *Cell*  
740 153:628-639.
- 741 20. Kirstein J, Schlothauer T, Dougan DA, Lilie H, Tischendorf G, Mogk A, Bukau B, Turgay K.  
742 2006. Adaptor protein controlled oligomerization activates the AAA+ protein ClpC. *The*  
743 *EMBO Journal* 25:1481-1491.
- 744 21. Baker TA, Sauer RT. 2012. ClpXP, an ATP-powered unfolding and protein-degradation  
745 machine. *Biochimica et biophysica acta* 1823:15-28.
- 746 22. Alexopoulos JA, Guarné A, Ortega J. 2012. ClpP: A structurally dynamic protease regulated  
747 by AAA+ proteins. *Journal of Structural Biology* 179:202-210.
- 748 23. Yu AYH, Houry WA. 2007. ClpP: A distinctive family of cylindrical energy-dependent  
749 serine proteases. *FEBS Letters* 581:3749-3757.
- 750 24. Grimaud R, Kessel M, Beuron F, Steven AC, Maurizi MR. 1998. Enzymatic and Structural  
751 Similarities between the *Escherichia coli* ATP-dependent Proteases, ClpXP and ClpAP.  
752 *Journal of Biological Chemistry* 273:12476-12481.
- 753 25. Bewley MC, Graziano V, Griffin K, Flanagan JM. 2006. The asymmetry in the mature  
754 amino-terminus of ClpP facilitates a local symmetry match in ClpAP and ClpXP complexes.  
755 *Journal of structural biology* 153:113-128.
- 756 26. Hall BM, Breidenstein EBM, de la Fuente-Núñez C, Reffuveille F, Mawla GD, Hancock  
757 REW, Baker TA. 2017. Two Isoforms of Clp Peptidase in *Pseudomonas aeruginosa* Control  
758 Distinct Aspects of Cellular Physiology. *Journal of Bacteriology* 199:e00568-16.

- 759 27. Akopian T, Kandrор O, Raju RM, UnniKrishnan M, Rubin EJ, Goldberg AL. 2012. The  
760 active ClpP protease from *M. tuberculosis* is a complex composed of a heptameric ClpP1 and  
761 a ClpP2 ring. *The EMBO Journal* 31:1529-1541.
- 762 28. Dahmen M, Vielberg M-T, Groll M, Sieber Stephan A. 2015. Structure and Mechanism of  
763 the Caseinolytic Protease ClpP1/2 Heterocomplex from *Listeria monocytogenes*.  
764 *Angewandte Chemie International Edition* 54:3598-3602.
- 765 29. Balogh D, Dahmen M, Stahl M, Poreba M, Gersch M, Drag M, Sieber SA. 2017. Insights  
766 into ClpXP proteolysis: heterooligomerization and partial deactivation enhance chaperone  
767 affinity and substrate turnover in *Listeria monocytogenes*. *Chemical Science* 8:1592-1600.
- 768 30. Shaw EI, Dooley CA, Fischer ER, Scidmore MA, Fields KA, Hackstadt T. 2002. Three  
769 temporal classes of gene expression during the *Chlamydia trachomatis* developmental cycle.  
770 *Molecular Microbiology* 37:913-925.
- 771 31. Wichlan DG, Hatch TP. 1993. Identification of an early-stage gene of *Chlamydia psittaci*  
772 6BC. *Journal of Bacteriology* 175:2936-2942.
- 773 32. Douglas AL, Hatch TP. 2000. Expression of the transcripts of the sigma factors and putative  
774 sigma factor regulators of *Chlamydia trachomatis* L2. *Gene* 247:209-214.
- 775 33. Ouellette SP, Rueden KJ, Gaudiard E, Persons L, de Boer PA, Ladant D. 2014. Analysis of  
776 MreB interactors in *Chlamydia* reveals a RodZ homolog but fails to detect an interaction with  
777 MraY. *Frontiers in Microbiology* 5:279.
- 778 34. Martin A, Baker TA, Sauer RT. 2008. Diverse pore loops of the AAA+ ClpX machine  
779 mediate unassisted and adaptor-dependent recognition of ssrA-tagged substrates. *Molecular*  
780 *cell* 29:441-450.

- 781 35. Ni T, Ye F, Liu X, Zhang J, Liu H, Li J, Zhang Y, Sun Y, Wang M, Luo C, Jiang H, Lan L,  
782 Gan J, Zhang A, Zhou H, Yang C-G. 2016. Characterization of Gain-of-Function Mutant  
783 Provides New Insights into ClpP Structure. *ACS Chemical Biology* 11:1964-1972.
- 784 36. Wickstrum J, Sammons LR, Restivo KN, Hefty PS. 2013. Conditional Gene Expression in  
785 *Chlamydia trachomatis* Using the Tet System. *PLoS ONE* 8:e76743.
- 786 37. Feng J, Michalik S, Varming AN, Andersen JH, Albrecht D, Jelsbak L, Krieger S, Ohlsen K,  
787 Hecker M, Gerth U, Ingmer H, Frees D. 2013. Trapping and Proteomic Identification of  
788 Cellular Substrates of the ClpP Protease in *Staphylococcus aureus*. *Journal of Proteome*  
789 *Research* 12:547-558.
- 790 38. Rucks EA, Olson MG, Jorgenson LM, Srinivasan RR, Ouellette SP. 2017. Development of a  
791 Proximity Labeling System to Map the *Chlamydia trachomatis* Inclusion Membrane.  
792 *Frontiers in Cellular and Infection Microbiology* 7:40.
- 793 39. Ouellette SP. 2018. Feasibility of a Conditional Knockout System for *Chlamydia* Based on  
794 CRISPR Interference. *Frontiers in Cellular and Infection Microbiology* 8:59.
- 795 40. Joshi SA, Hersch GL, Baker TA, Sauer RT. 2004. Communication between ClpX and ClpP  
796 during substrate processing and degradation. *Nature Structural & Molecular Biology*  
797 11:404.
- 798 41. Schmitz KR, Carney DW, Sello JK, Sauer RT. 2014. Crystal structure of *Mycobacterium*  
799 *tuberculosis* ClpP1P2 suggests a model for peptidase activation by AAA+ partner binding  
800 and substrate delivery. *Proceedings of the National Academy of Sciences of the United States*  
801 *of America* 111:E4587-E4595.
- 802 42. Karimova G, Pidoux J, Ullmann A, Ladant D. 1998. A bacterial two-hybrid system based on  
803 a reconstituted signal transduction pathway. *Proceedings of the National Academy of*  
804 *Sciences of the United States of America* 95:5752-5756.

- 805 43. Woo KM, Chung WJ, Ha DB, Goldberg AL, Chung CH. 1989. Protease Ti from *Escherichia*  
806 *coli* requires ATP hydrolysis for protein breakdown but not for hydrolysis of small peptides.  
807 *Journal of Biological Chemistry* 264:2088-2091.
- 808 44. Gersch M, Stahl M, Poreba M, Dahmen M, Dziedzic A, Drag M, Sieber SA. 2016. Barrel-  
809 shaped ClpP Proteases Display Attenuated Cleavage Specificities. *ACS Chemical Biology*  
810 11:389-399.
- 811 45. Brötz-Oesterhelt H, Beyer D, Kroll H-P, Endermann R, Ladel C, Schroeder W, Hinzen B,  
812 Raddatz S, Paulsen H, Henninger K, Bandow JE, Sahl H-G, Labischinski H. 2005.  
813 Dysregulation of bacterial proteolytic machinery by a new class of antibiotics. *Nature*  
814 *Medicine* 11:1082.
- 815 46. Conlon BP, Nakayasu ES, Fleck LE, LaFleur MD, Isabella VM, Coleman K, Leonard SN,  
816 Smith RD, Adkins JN, Lewis K. 2013. Killing persister cells and eradicating a biofilm  
817 infection by activating the ClpP protease. *Nature* 503:365-370.
- 818 47. Leung E, Datti A, Cossette M, Goodreid J, McCaw Shannon E, Mah M, Nakhamchik A,  
819 Ogata K, El Bakkouri M, Cheng Y-Q, Wodak Shoshana J, Eger Bryan T, Pai Emil F, Liu J,  
820 Gray-Owen S, Batey Robert A, Houry Walid A. 2011. Activators of Cylindrical Proteases as  
821 Antimicrobials: Identification and Development of Small Molecule Activators of ClpP  
822 Protease. *Chemistry & Biology* 18:1167-1178.
- 823 48. Hwang BJ, Park WJ, Chung CH, Goldberg AL. 1987. *Escherichia coli* contains a soluble  
824 ATP-dependent protease (Ti) distinct from protease La. *Proceedings of the National*  
825 *Academy of Sciences of the United States of America* 84:5550-5554.
- 826 49. Flanagan JM, Wall JS, Capel MS, Schneider DK, Shanklin J. 1995. Scanning Transmission  
827 Electron Microscopy and Small-Angle Scattering Provide Evidence that Native *Escherichia*  
828 *coli* ClpP is a Tetradecamer with an Axial Pore. *Biochemistry* 34:10910-10917.

- 829 50. Wang J, Hartling JA, Flanagan JM. 1997. The Structure of ClpP at 2.3 Å Resolution Suggests  
830 a Model for ATP-Dependent Proteolysis. *Cell* 91:447-456.
- 831 51. Lee ME, Baker TA, Sauer RT. 2010. Control of substrate gating and translocation into ClpP  
832 by channel residues and ClpX binding. *Journal of molecular biology* 399:707-718.
- 833 52. Thompson MW, Singh SK, Maurizi MR. 1994. Processive degradation of proteins by the  
834 ATP-dependent Clp protease from *Escherichia coli*. Requirement for the multiple array of  
835 active sites in ClpP but not ATP hydrolysis. *Journal of Biological Chemistry* 269:18209-  
836 18215.
- 837 53. Jennings LD, Bohon J, Chance MR, Licht S. 2008. The ClpP N-terminus coordinates  
838 substrate access with protease active site reactivity. *Biochemistry* 47:11031-11040.
- 839 54. Benaroudj N, Raynal B, Miot M, Ortiz-Lombardia M. 2011. Assembly and proteolytic  
840 processing of mycobacterial ClpP1 and ClpP2. *BMC Biochemistry* 12:61-61.
- 841 55. Dahmen M, Vielberg MT, Groll M, Sieber Stephan A. 2015. Structure and Mechanism of the  
842 Caseinolytic Protease ClpP1/2 Heterocomplex from *Listeria monocytogenes*. *Angewandte*  
843 *Chemie International Edition* 54:3598-3602.
- 844 56. Gaillot O, Bregenholt S, Jaubert F, Di Santo JP, Berche P. 2001. Stress-Induced ClpP Serine  
845 Protease of *Listeria monocytogenes* Is Essential for Induction of Listeriolysin O-Dependent  
846 Protective Immunity. *Infection and Immunity* 69:4938-4943.
- 847 57. Martin A, Baker TA, Sauer RT. 2007. Distinct static and dynamic interactions control  
848 ATPase-peptidase communication in a AAA+ protease. *Molecular cell* 27:41-52.
- 849 58. Lee B-G, Park EY, Lee K-E, Jeon H, Sung KH, Paulsen H, Rübsamen-Schaeff H, Brötz-  
850 Oesterhelt H, Song HK. 2010. Structures of ClpP in complex with acyldepsipeptide  
851 antibiotics reveal its activation mechanism. *Nature Structural & Molecular Biology*  
852 17:471.

- 853 59. Bewley MC, Graziano V, Griffin K, Flanagan JM. 2009. Turned on for degradation: ATPase-  
854 independent degradation by ClpP. *Journal of structural biology* 165:118-125.
- 855 60. Li DHS, Chung YS, Gloyd M, Joseph E, Ghirlando R, Wright GD, Cheng Y-Q, Maurizi MR,  
856 Guarné A, Ortega J. 2010. Acyldepsipeptide Antibiotics Induces the Formation of a  
857 Structured Axial Channel in ClpP: a Model for the ClpX/ClpA Bound State of ClpP.  
858 *Chemistry & biology* 17:959-969.
- 859 61. Ouellette SP, Dorsey FC, Moshiah S, Cleveland JL, Carabeo RA. 2011. Chlamydia Species-  
860 Dependent Differences in the Growth Requirement for Lysosomes. *PLoS ONE* 6:e16783.
- 861 62. Kane CD, Vena RM, Ouellette SP, Byrne GI. 1999. Intracellular Tryptophan Pool Sizes May  
862 Account for Differences in Gamma Interferon-Mediated Inhibition and Persistence of  
863 Chlamydial Growth in Polarized and Nonpolarized Cells. *Infection and Immunity* 67:1666-  
864 1671.
- 865 63. Ouellette SP, Rueden KJ, Rucks EA. 2016. Tryptophan Codon-Dependent Transcription in  
866 *Chlamydia pneumoniae* during Gamma Interferon-Mediated Tryptophan Limitation.  
867 *Infection and Immunity* 84:2703-2713.
- 868 64. Wang Y, Kahane S, Cutcliffe LT, Skilton RJ, Lambden PR, Clarke IN. 2011. Development  
869 of a Transformation System for *Chlamydia trachomatis*: Restoration of Glycogen  
870 Biosynthesis by Acquisition of a Plasmid Shuttle Vector. *PLoS Pathogens* 7:e1002258.
- 871 65. Illingworth M, Hooppaw AJ, Ruan L, Fisher DJ, Chen L. 2017. Biochemical and Genetic  
872 Analysis of the Chlamydia GroEL Chaperonins. *Journal of Bacteriology* 199:e00844-16.
- 873 66. Scidmore MA. 2006. Cultivation and Laboratory Maintenance of *Chlamydia trachomatis*.  
874 *Current Protocols in Microbiology* 00:11A.1.1-11A.1.25.

- 875 67. Altschul SF, Wootton JC, Gertz EM, Agarwala R, Morgulis A, Schäffer AA, Yu Y-K. 2005.  
876 Protein Database Searches Using Compositionally Adjusted Substitution Matrices. The FEBS  
877 journal 272:5101-5109.
- 878 68. Sievers F, Wilm A, Dineen D, Gibson TJ, Karplus K, Li W, Lopez R, McWilliam H,  
879 Remmert M, Söding J, Thompson JD, Higgins DG. 2011. Fast, scalable generation of high-  
880 quality protein multiple sequence alignments using Clustal Omega. Molecular Systems  
881 Biology 7:539-539.
- 882 69. Troshin PV, Procter JB, Barton GJ. 2011. Java bioinformatics analysis web services for  
883 multiple sequence alignment—JABAWS:MSA. Bioinformatics 27:2001-2002.
- 884 70. Kelley LA, Mezulis S, Yates CM, Wass MN, Sternberg MJE. 2015. The Phyre2 web portal  
885 for protein modelling, prediction and analysis. Nature protocols 10:845-858.
- 886 71. Pettersen EF, Goddard TD, Huang CC, Couch GS, Greenblatt DM, Meng EC, Ferrin TE.  
887 2004. UCSF Chimera—A visualization system for exploratory research and analysis. Journal  
888 of Computational Chemistry 25:1605-1612.
- 889 72. Ouellette SP, Gaudiard E, Antosová Z, Ladant D. 2014. A Gateway®-compatible bacterial  
890 adenylate cyclase-based two-hybrid system. Environmental Microbiology Reports 6:259-267.
- 891 73. Ouellette SP, Hatch TP, AbdelRahman YM, Rose LA, Belland RJ, Byrne GI. 2006. Global  
892 transcriptional upregulation in the absence of increased translation in Chlamydia during  
893 IFN $\gamma$ -mediated host cell tryptophan starvation. Molecular Microbiology 62:1387-1401.
- 894 74. Mueller KE, Wolf K, Fields KA. 2017. Chlamydia trachomatis Transformation and Allelic  
895 Exchange Mutagenesis. Current Protocols in Microbiology 45:11A.3.1-11A.3.15.
- 896 75. Robichon C, Karimova G, Beckwith J, Ladant D. 2011. Role of Leucine Zipper Motifs in  
897 Association of the *Escherichia coli* Cell Division Proteins FtsL and FtsB. Journal of  
898 Bacteriology 193:4988-4992.

899 76. Trentini DB, Suskiewicz MJ, Heuck A, Kurzbauer R, Deszcz L, Mechtler K, Clausen T.  
900 2016. Arginine phosphorylation marks proteins for degradation by a Clp protease. *Nature*  
901 539:48.  
902



903 **Figure Legends**

904

905 **Figure 1: The *clp* genes are expressed during RB growth. (A) Gene maps** of the *clp* genes in the  
906 *Chlamydia trachomatis* genome. Gene numbers are in numerical order from left to right and reflect  
907 the serovar D numbering scheme of Stephens et al. (18). The *clp* genes are circled in red. The *clpP2*  
908 gene is *ct706*. **(B) – (E) Temporal expression** of the *clp* genes. RT-qPCR analysis of the *clp* genes  
909 from two independent time course experiments of a *C. trachomatis* serovar L2 infection of HEp2  
910 cells was performed. Total RNA and DNA were collected at the indicated times post infection and  
911 processed as described in Materials and Methods. Equivalent amounts of cDNA were used for each  
912 assay and analyzed in triplicate. Results were reported as a ratio of cDNA to genomic DNA.  
913 Standard deviations for each were typically less than 10% of the sample. Note that some transcripts  
914 were not detectable at 1 hpi. Western blotting was performed on whole cell lysates of total protein  
915 from a time course of *Chlamydia*-infected cells, separated by SDS-PAGE, and transferred to a  
916 nitrocellulose membrane for blotting. All four of the genes analyzed appear to be expressed mid-  
917 developmental cycle. **(F) Major outer** membrane protein (MOMP) was blotted as a control for  
918 chlamydial development over the course of infection.

919

920 **Figure 2: Bioinformatics analyses suggest both chlamydial ClpP paralogs are functional**  
921 **proteases.** Pairwise alignments performed using NCBI-BLAST (default settings) and presented as  
922 %Identity/%Similarity/%Coverage. Multiple sequence alignment performed using Clustal Omega  
923 default settings and presented using Jalview Version 2. Organisms included are *C. trachomatis* (Ctr),  
924 *E. coli* (Ec), *B. subtilis* (Bs), *M. tuberculosis* (Mtb), and *P. aeruginosa* (Pa). Predicted 3D structures  
925 acquired from Phyre2 aligned and colored in Chimera (UCSF). **(A) Conserved residues** highlighted  
926 in varying shades of blue depending on conservation strength across species, with the catalytic triad

927 in red, the oligomer interface in yellow, and the hydrophobic docking region in green. Residues in  
928 which ClpP1 has a radically different substitution compared to other ClpP proteins are denoted by  $\Omega$ .  
929 Residues involved in activation conformational changes denoted by  $\psi$  (35) **(B) 3D structural**  
930 **alignment** of Ctr ClpP1, Ctr ClpP2, and Ec ClpP (peptide colors as shown in multiple sequence  
931 alignment). Active site residues are circled in red. **(C) Space filling model** of predicted 3D  
932 structures. “Rear” is a 180° rotation around the Y axis to show the surface of the protein not shown  
933 in the “Front” image.

934

935 **Figure 3: Overexpression of wild type or inactive ClpP proteins has varying effects on**  
936 ***Chlamydia*. *C. trachomatis* serovar L2** was transformed with anhydrotetracycline (aTc)-inducible  
937 shuttle vectors encoding either wild type or active site mutants of each ClpP paralog with a 6xHis tag  
938 at the C-terminus. HEp2 cells were infected with each transformant, and expression was induced at  
939 10h post infection (hpi). **(A) ClpP1 wild type and S92A overexpression** assay. Overexpression of  
940 inactive ClpP1 has a negative impact on the bacteria. **(B) ClpP2 wild type and S98A**  
941 **overexpression** assay. Parameters same as described above. Overexpression does not appear to  
942 negatively affect *Chlamydia*. Samples were stained for major outer membrane protein (MOMP;  
943 green), 6xHis tagged ClpP protein of interest (red), and DNA (blue). Representative images of three  
944 independent experiments are presented. Scale bars are equal to 10  $\mu$ m. Images were acquired on a  
945 Zeiss LSM 800 laser scanning confocal microscope with a 60x objective and a 3x digital  
946 magnification. **(C) Inclusion forming unit (IFU) assay** measuring the effect of increasing levels of  
947 ClpP protein induction on chlamydial growth. Values and error bars are averages of three  
948 independent experiments and are reported as a % of the respective uninduced sample. \*= P<0.05,  
949 N.S.= not significant.

950

951 **Figure 4: The chlamydial ClpP paralogs self-associate but do not form hetero-oligomeric**  
952 **complexes. (A) Bacterial adenylate cyclase-based two-hybrid assay** of homotypic interactions of  
953 *C. trachomatis* (Ctr) ClpP1 and ClpP2. The indicated constructs encoding each *clpP* paralog fused to  
954 the T18 or T25 fragment of the Cya toxin of *B. pertussis* were co-transformed into  $\Delta$ *cya E. coli*  
955 DHT1 and plated on minimal medium containing X-gal. Interactions between proteins results in the  
956 formation of blue colonies. Representative images of results from at least three independent  
957 experiments are shown along with positive (Zip/Zip) and negative (T25 empty vector versus T18-  
958 Zip) controls. Photos set to grayscale. **(B)  $\beta$ -Galactosidase assay** results from experiments  
959 performed as described in Panel (A). Y-axis is a measurement of relative units of beta-galactosidase  
960 activity. X-axis indicates the test conditions for proteins fused to the T25 or T18 as indicated.  
961 Interactions are considered positive when at least five times the activity of the negative control is  
962 measured. Only homotypic interactions were positive in these assays. **(C) Test of ClpP**  
963 **Oligomerization by Native-PAGE.** 5  $\mu$ g samples were run on 4-20% native-PAGE gels and stained  
964 with Coomassie for protein detection. Representative results from at least three experiments with  
965 independent protein purifications are shown. The Ctr ClpP1 methionine mutant (M6L/M7I) was run  
966 in a separate lane and the contrast was uniformly adjusted to help with band visualization. Native  
967 molecular weight markers are shown to the left of the gel. *E. coli* (Ec) ClpP is included as a positive  
968 control on the far right of the gel. **(D) Test of Hetero-oligomerization between Ctr ClpP1 and Ctr**  
969 **ClpP2.** Each recombinant protein was incubated together prior to electrophoresis. The gel has been  
970 cropped and enlarged to aid in detecting P1 and P2 hetero-oligomers, which appear to be absent  
971 consistent with panel (B) results. The predicted heptamer/tetradecamer sizes in kDa are: Ctr ClpP1,  
972 154/308; Ctr ClpP2 161/322; and Ec ClpP 168/336.  
973

974 **Figure 5: Chlamydial ClpP2, but not ClpP1, has ATPase-independent protease activity.** *In vitro*  
975 protease activity of the *C. trachomatis* (Ctr) ClpP proteins versus a peptide substrate. ClpP samples  
976 (1  $\mu$ M monomer) were incubated with the fluorometric peptide Suc-Luc-Tyr-AMC, and fluorescence  
977 was analyzed over a time. **(A) Relative activity** is shown for each protein run with or without the  
978 sodium citrate buffer. Use of sodium citrate buffer is indicated as “Sod-Cit”. Loss of activity is  
979 observed for the Ctr ClpP2 catalytic serine mutant. **(B) *E. coli* (Ec) ClpP** was used as a positive  
980 control. Experiments were run a minimum of three times and baseline assay values obtained with  
981 buffer alone were subtracted from each sample. Average values are reported with standard error.

982  
983 **Figure 6: ClpP2, but not ClpP1, activity is stimulated by the antibiotic ACP1, which is**  
984 **detrimental to chlamydial growth.** **(A-C) Casein (1  $\mu$ g)** was incubated with 1  $\mu$ M of the respective  
985 ClpP at 37 °C for 3 hours with or without the ACP compounds (used at 500  $\mu$ M). Reactions were  
986 halted by mixing samples with Laemmli followed by boiling. Samples were run on 12% SDS-PAGE  
987 and stained with Coomassie. Molecular weight markers are shown to the left of each gel.  
988 Representative gels are shown; at least three experiments were performed for each protein. Ctr = *C.*  
989 *trachomatis*. Ec = *E. coli* **(D) Cell viability** of ACP treated cells were analyzed with resazurin  
990 assays. Values are reported as a percentage of the vehicle control and are representative of three  
991 independent experiments. **(E) Reinfection models** of ACP drug-treated cells reported on a Log<sub>10</sub>  
992 scale. A student’s two-tailed T test was used to compare each parameter to the vehicle control (\*\*\*)=  
993 P<0.0001). For (D) and (E), HEp2 cells were infected with *C. trachomatis* serovar L2, and the ACP1  
994 compounds or DMSO only was added to the infected cultures at 8 hours post-infection (hpi). At 24  
995 hpi, cell viability was assessed for (D), or infected cells were collected to re-infect fresh monolayers  
996 to determine the recovery of inclusion forming units (IFUs) as described in Materials and Methods  
997 for (E).

998

999

1000

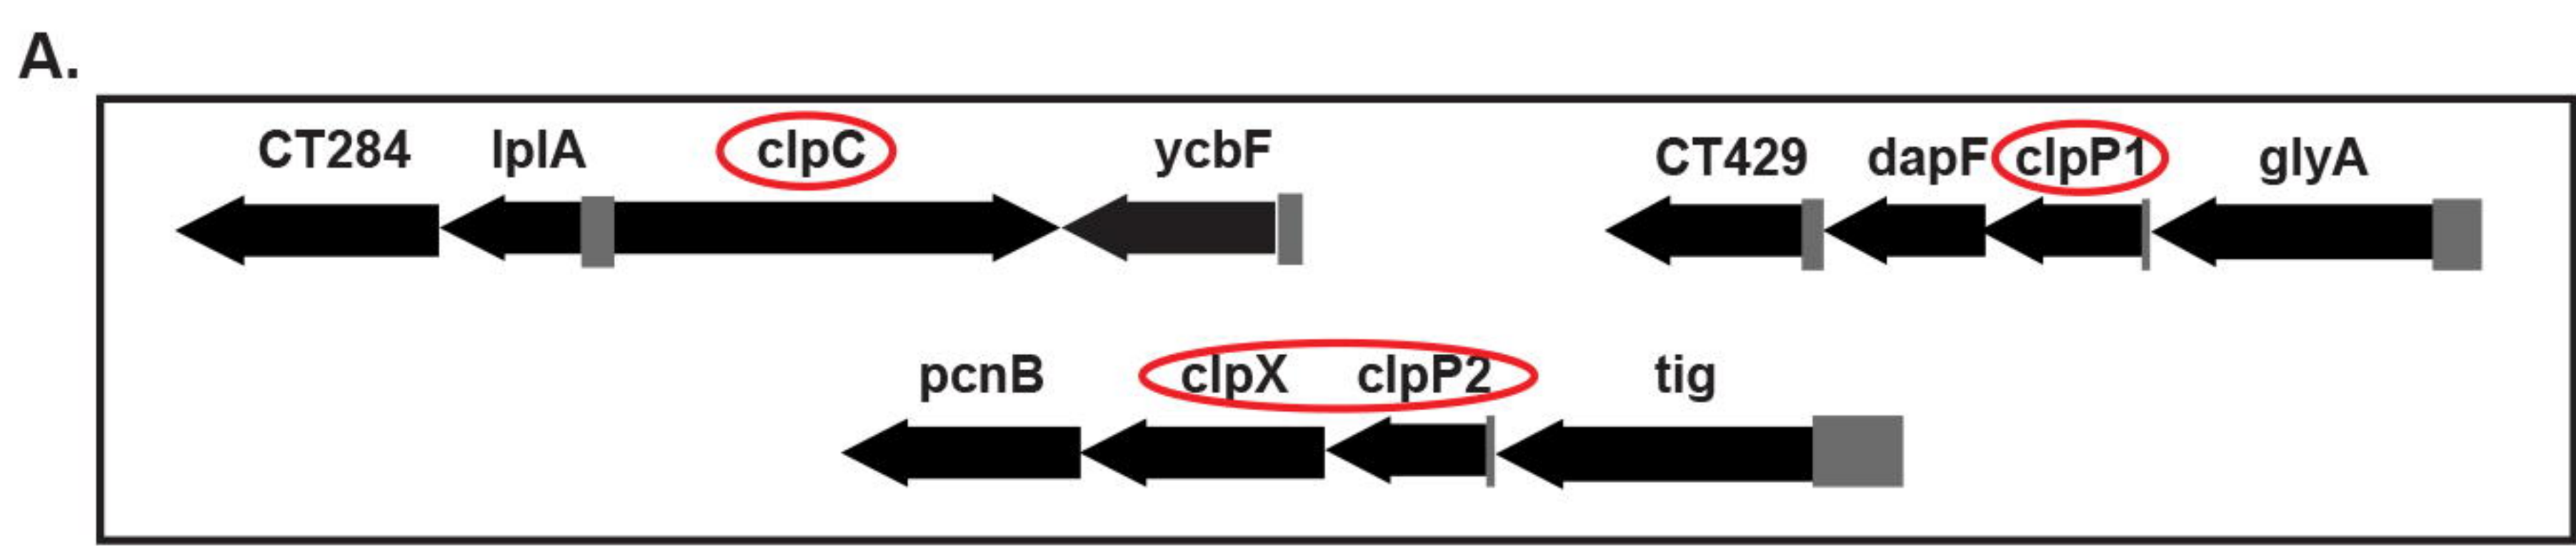

**B. ClpP1 Timecourse**

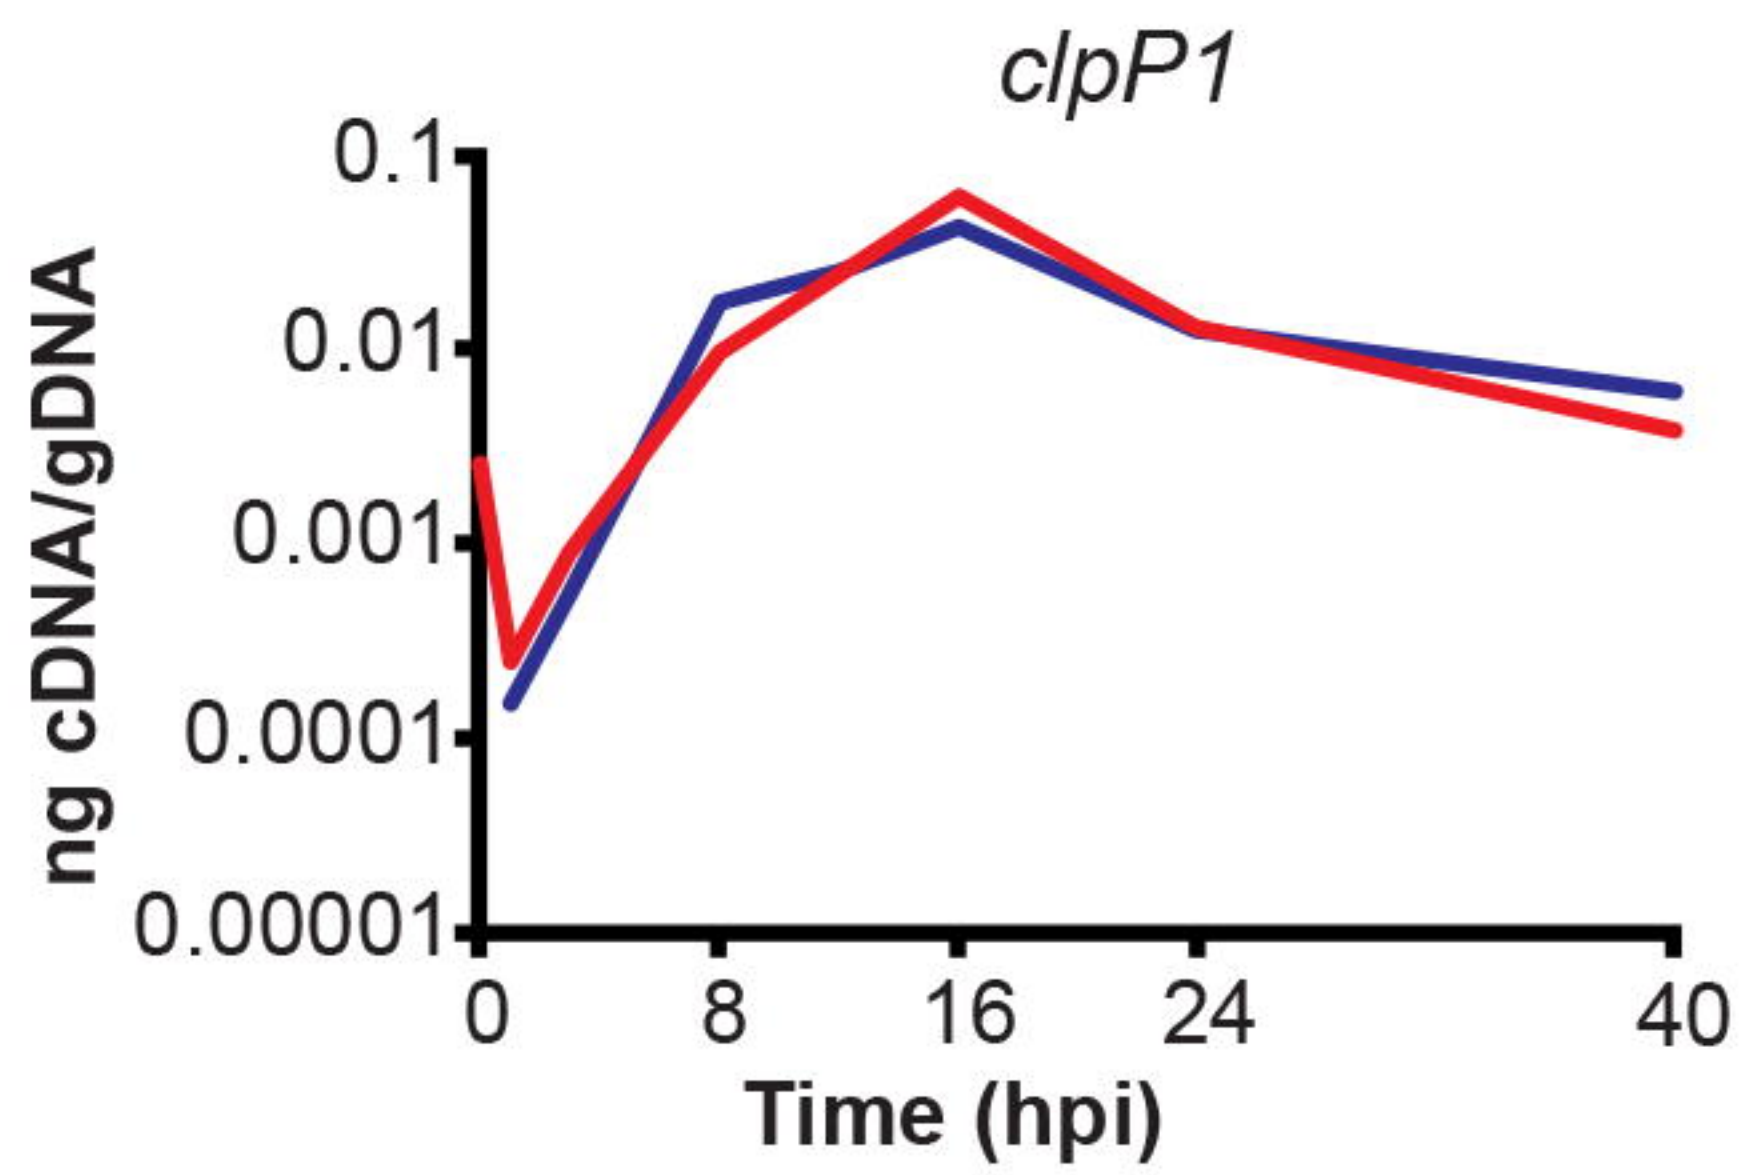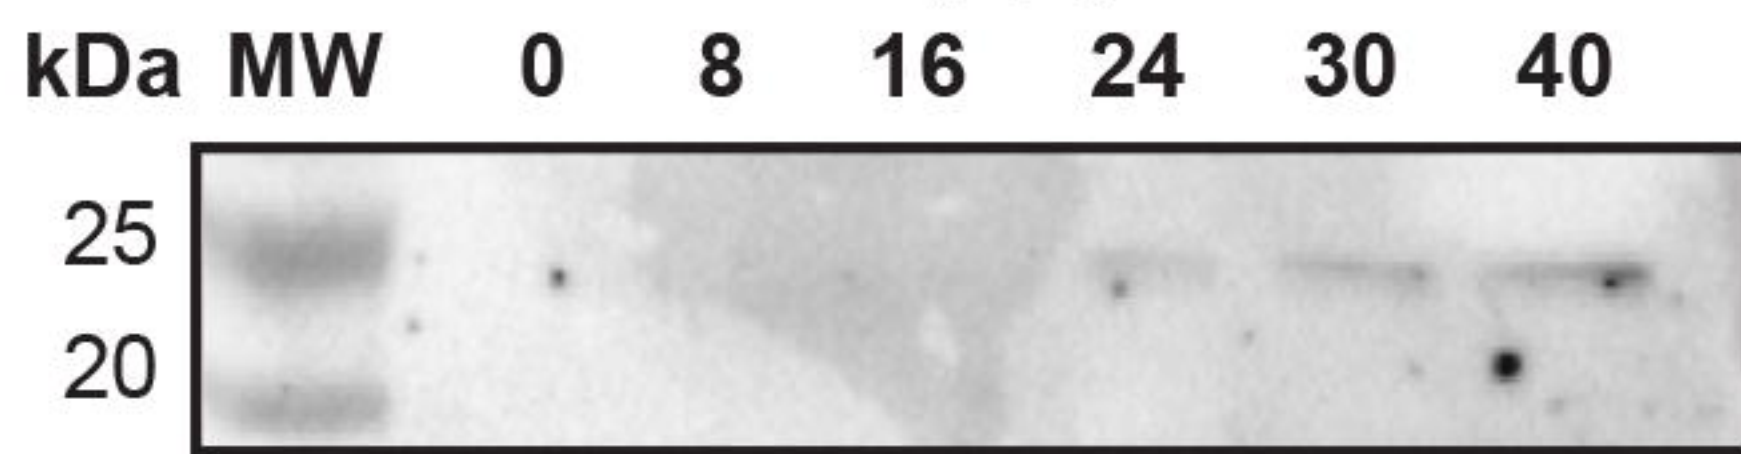

**C. ClpP2 Timecourse**

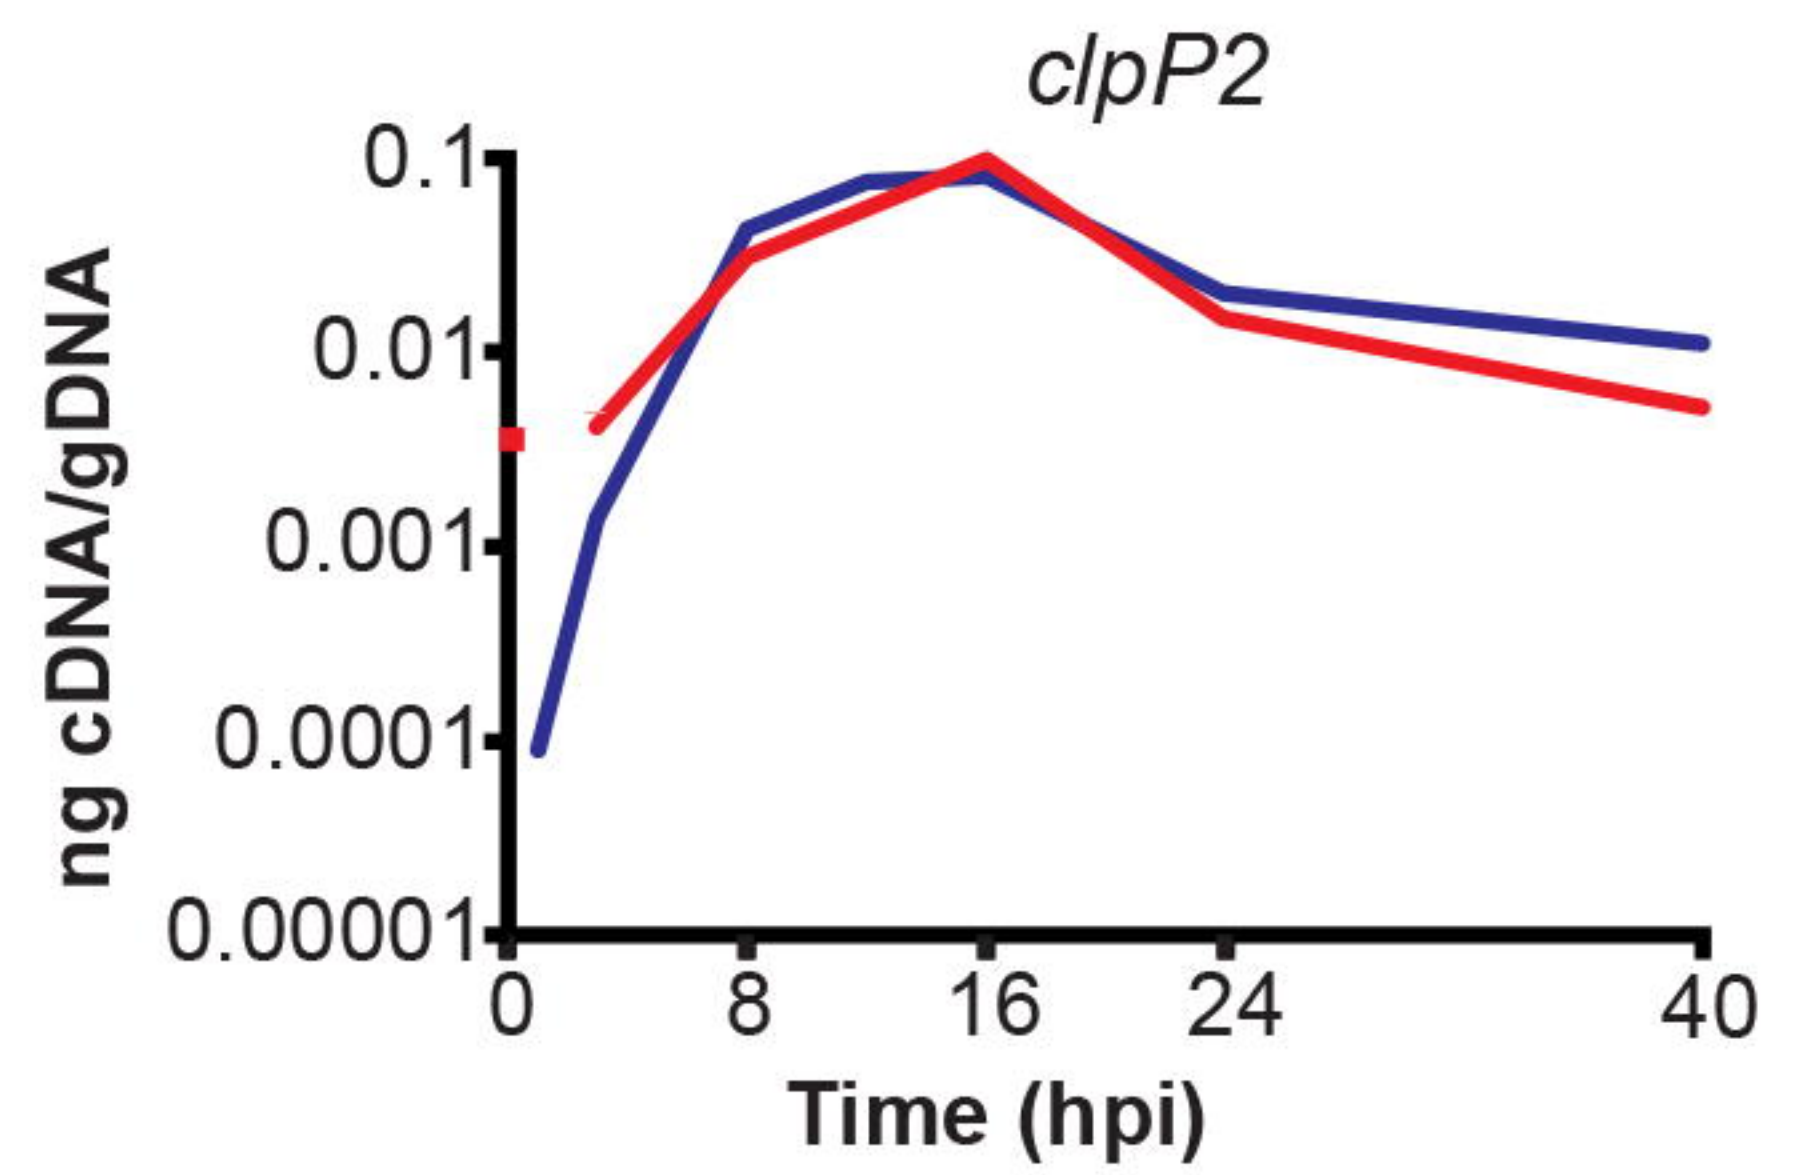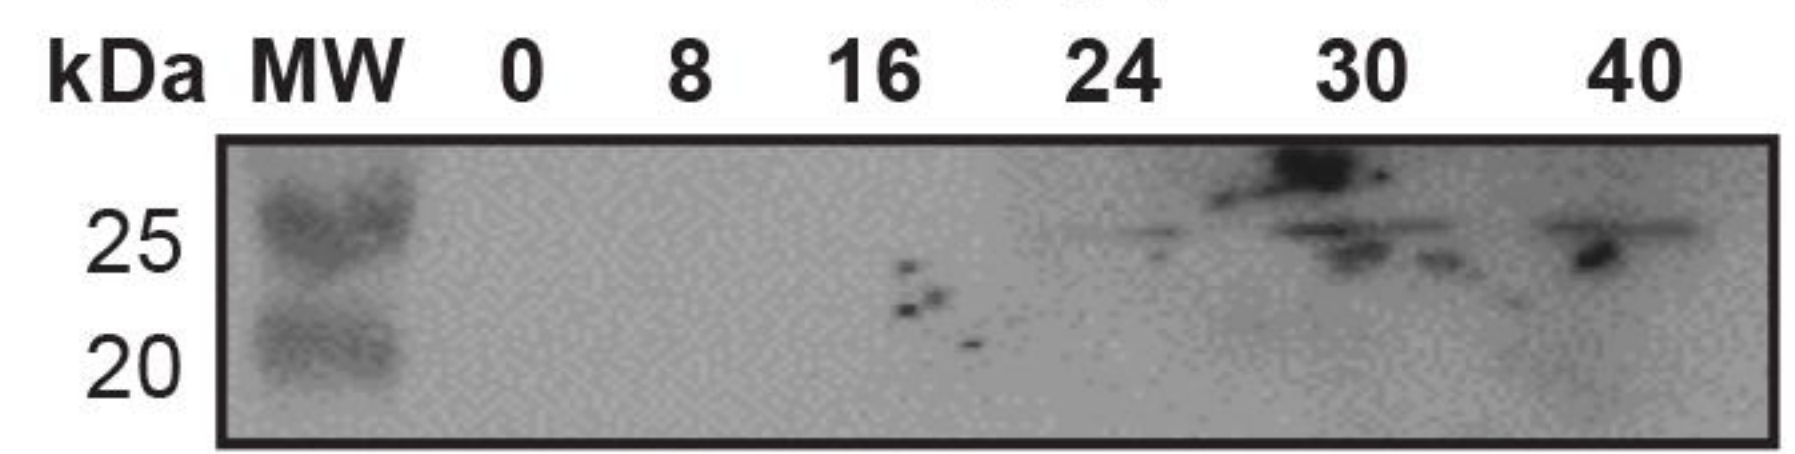

**D. ClpC Timecourse**

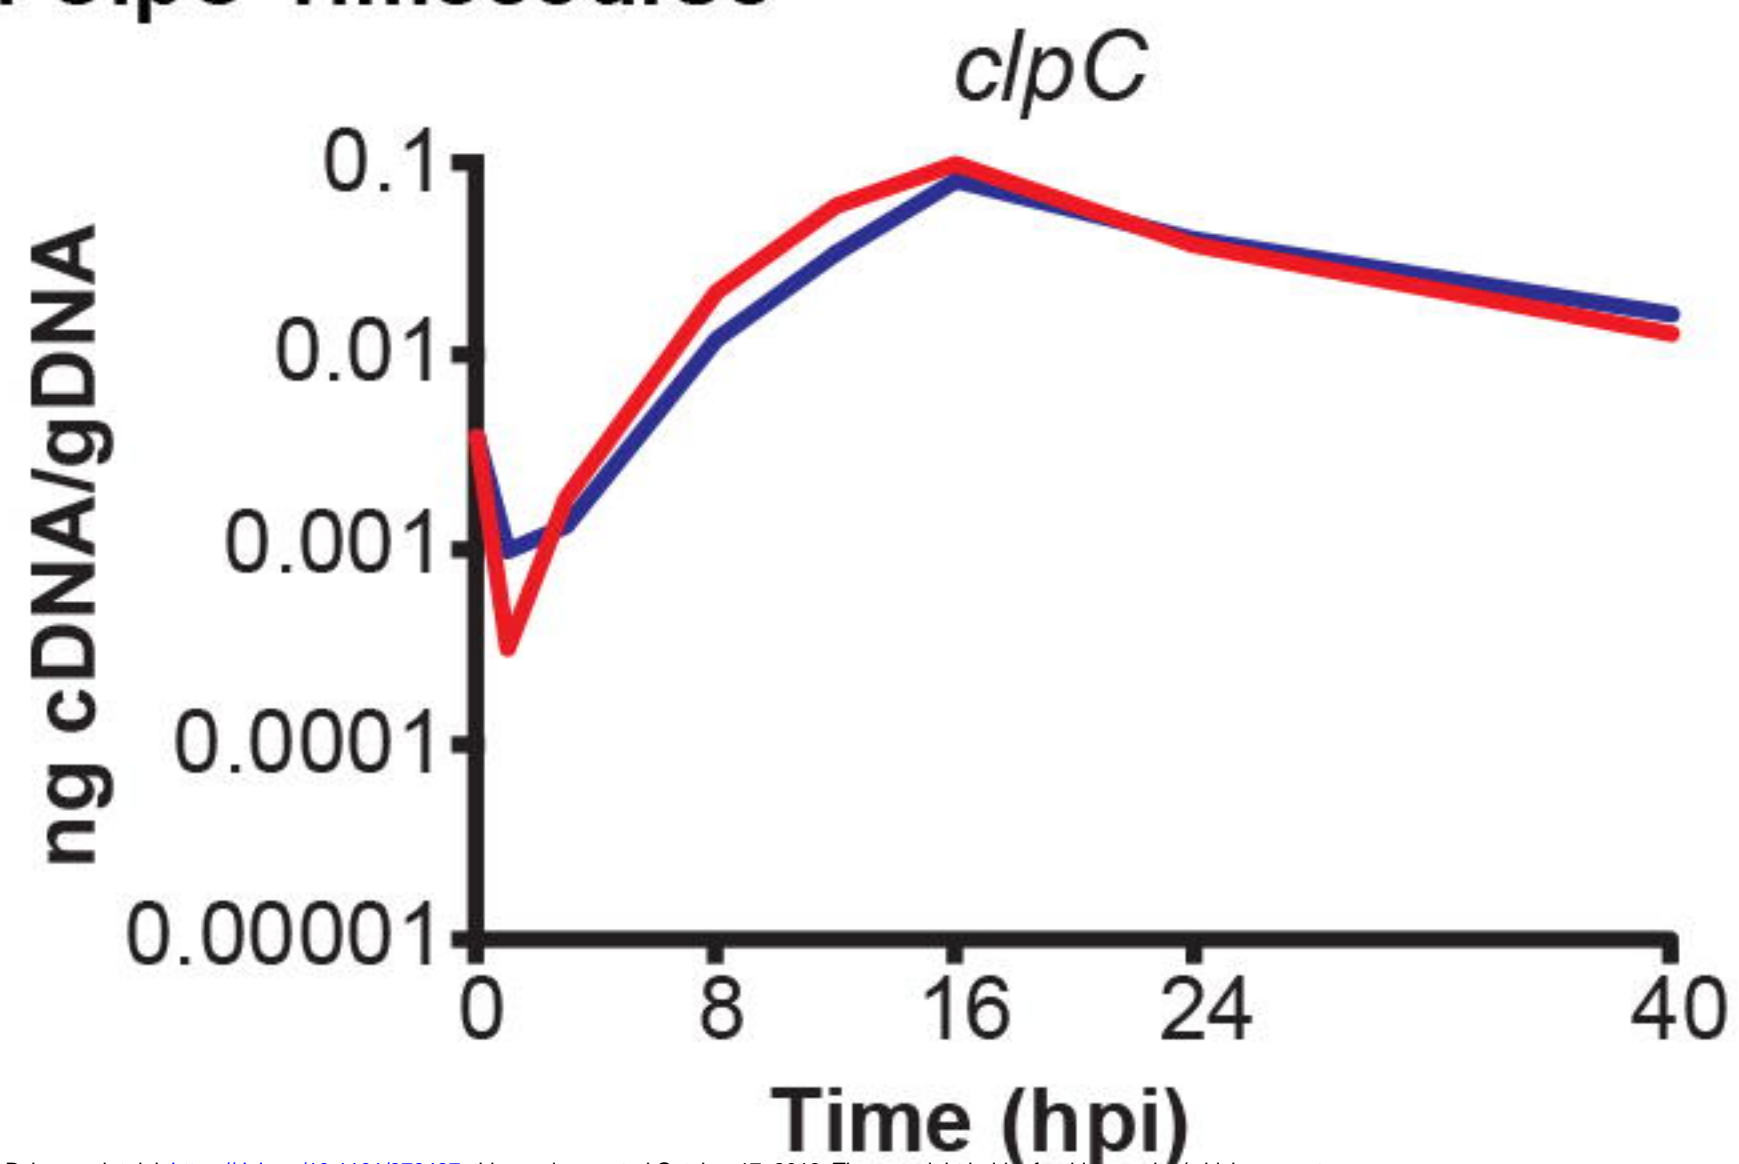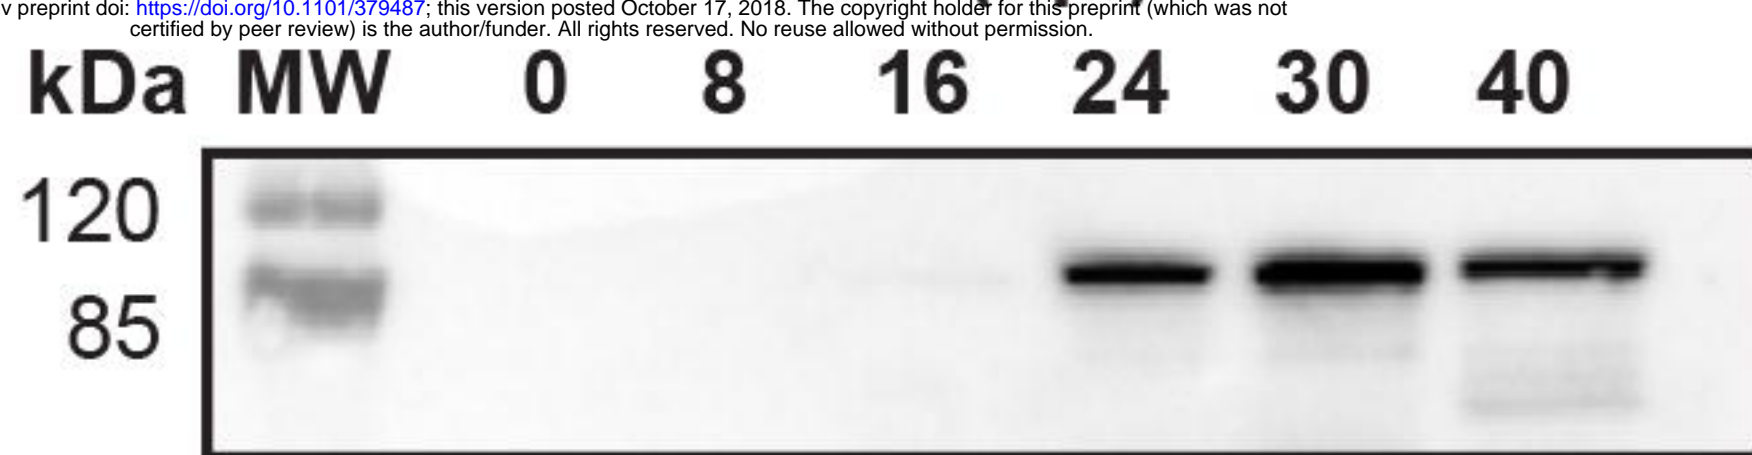

**E. ClpX Timecourse**

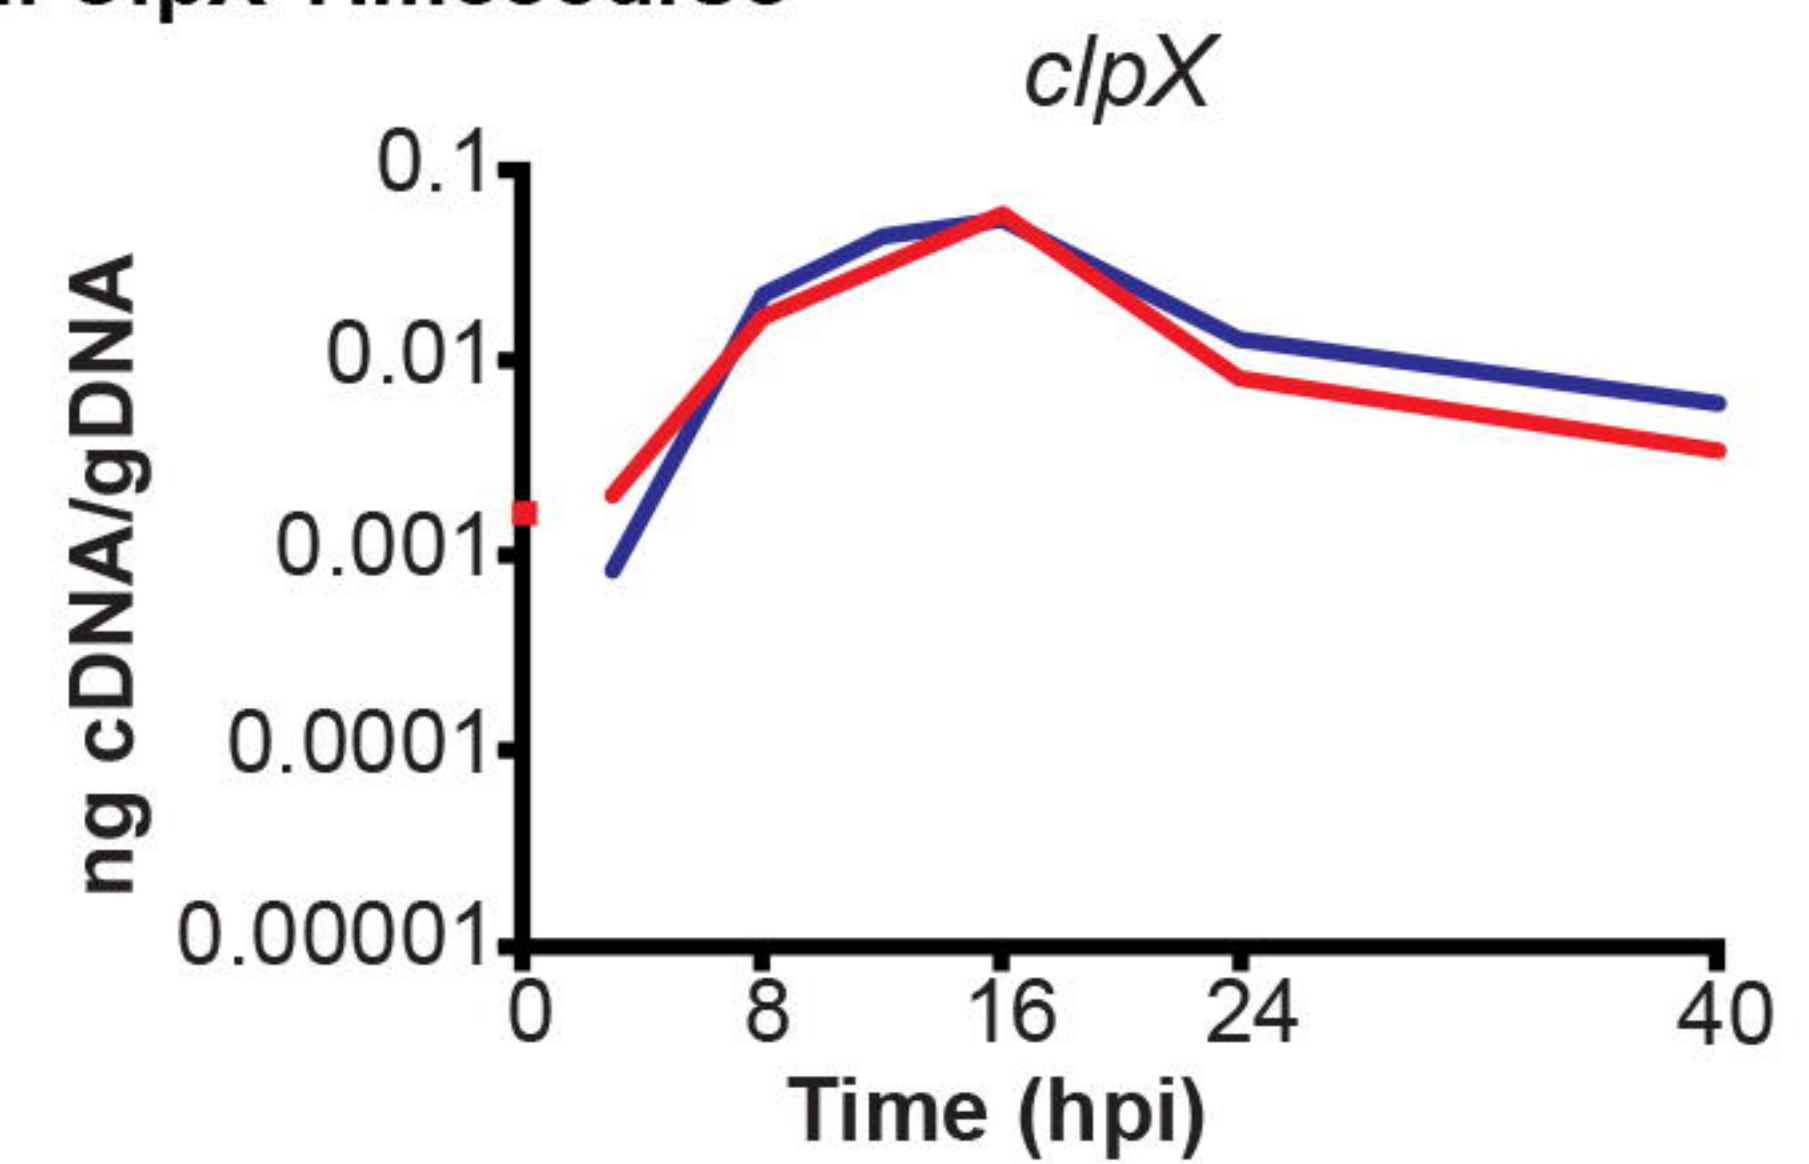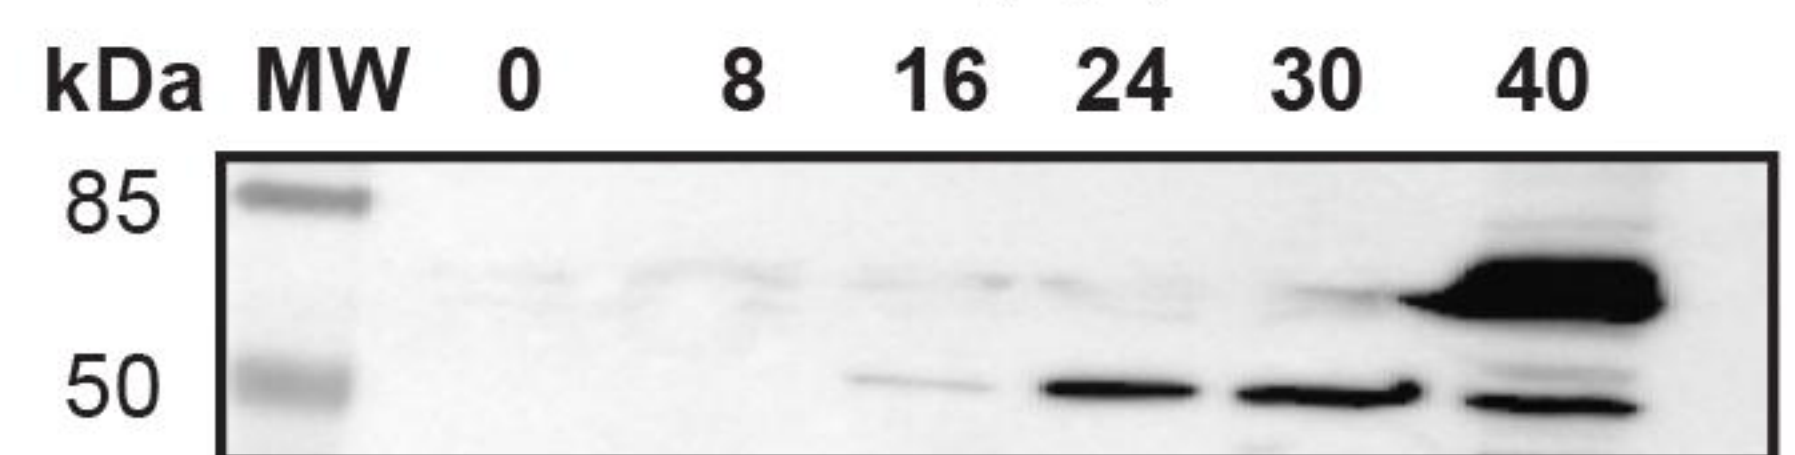

**F. Infected Cell Lysates, Anti-MOMP 1° Ab**

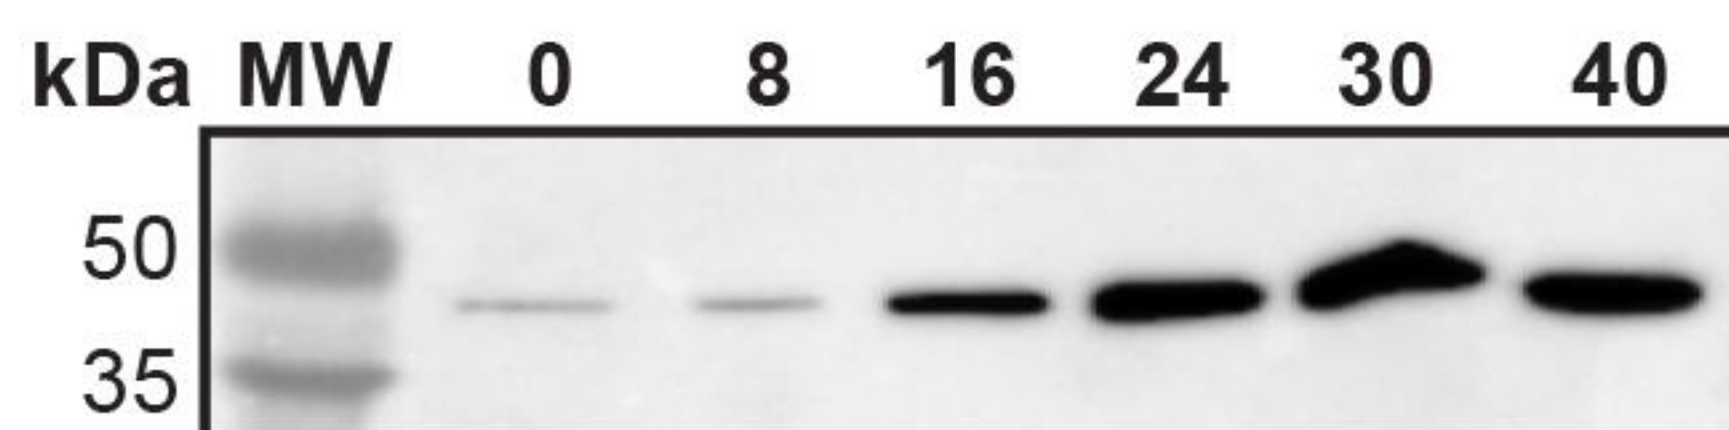

Fig. 1

A.

|                  | Ctr ClpP1   | Ctr ClpP2   | Ec ClpP     | Bs ClpP      | Mtb ClpP1   | Mtb ClpP2   | Pa ClpP1    | Pa ClpP2    |
|------------------|-------------|-------------|-------------|--------------|-------------|-------------|-------------|-------------|
| <b>Ctr ClpP1</b> | -           | 39%/58%/85% | 44%/63%/84% | 41%/61%/91%  | 38%/55%/87% | 38%/58%/79% | 42%/62%/80% | 36%/62%/86% |
| <b>Ctr ClpP2</b> | 39%/58%/91% | -           | 55%/78%/78% | 58%/77%/100% | 52%/74%/87% | 44%/68%/90% | 58%/78%/91% | 45%/66%/88% |

  

|               |   | Ψ       | ΨΩ           | ΩΩ          |             |            |            |           |          |        |    |
|---------------|---|---------|--------------|-------------|-------------|------------|------------|-----------|----------|--------|----|
| <b>Ctr P1</b> | 1 | -----MP | EGEMMHKLQDVI | DRKLLDSRRIF | FSEPVTEKSA  | AAEAIKKLWY | LELTNPGQ   | 52        |          |        |    |
| <b>Ctr P2</b> | 1 | -----   | MTLVPIYVV    | EDTGRGERAMD | IYSRLLKDRIV | MIGQEITEPL | ANTVIAQLLF | LMSDPTK   | 58       |        |    |
| <b>Ec P</b>   | 1 | ---MSY  | SGERDNFA-P   | HMALVPMVI   | EQTSRGRSFD  | IYSRLLKERV | IFLTGQVED  | HMANLIVAQ | MLFLEAEN | 71     |    |
| <b>Bs P</b>   | 1 | -----   | MNLIPTVI     | EQTNRGERAY  | DIYSRLLKDR  | IIMLGSAID  | DNVANSLIV  | SQLLFLA   | AEDPEK   | 58     |    |
| <b>Mtb P1</b> | 1 | -----   | MSQVTDMS     | SNSQGLSLT   | DSVYERLLS   | ERIIFLGSE  | VNDEIANR   | LCAQILL   | LAAEDAS  | 58     |    |
| <b>Mtb P2</b> | 1 | ----MNS | QNSQIQPQ     | ARYILPSFI   | EHSSFGVK    | ESNPYNKLF  | EERIIFLG   | VQVDDAS   | ANDIMAQ  | LLVLES | 70 |
| <b>Pa P1</b>  | 1 | MSRNSF  | IPHVPDIQ-    | AAGGLVPM    | VVEQSARG    | ERAYDIYS   | RLLKERV    | IFLVGQV   | EDYMAN   | LVAQLL | 74 |
| <b>Pa P2</b>  | 1 | ---MK-  | -----        | TDDKDR      | EGGDSHGA    | I GAKLM    | EYALKV     | RKVFT     | GGVDEK   | MAKDVV | 58 |

  

|               |    | Ψ             | Ω             | Ω                                                                                                                           |     |
|---------------|----|---------------|---------------|-----------------------------------------------------------------------------------------------------------------------------|-----|
| <b>Ctr P1</b> | 53 | P I V F V I N | S P G G S V   | D A G F A V W D Q I K M I S S P L T T V V T G L A A S M G S V L S L C A V P G R R F A T P H A R I M I H Q P S I G G T I T G | 127 |
| <b>Ctr P2</b> | 59 | D I Q I F I N | S P G G Y I   | T A G L A I Y D T I R F L G C D V N T Y C I G Q A A S M G A L L S A G T K G K R Y A L P H S R M M I H Q P S - - G G I I G   | 131 |
| <b>Ec P</b>   | 72 | D I Y L Y I N | S P G G V I   | T A G M S I Y D T M Q F I K P D V S T I C M G Q A A S M G A F L L T A G A K G K R F C L P N S R V M I H Q P L - - G G Y Q G | 144 |
| <b>Bs P</b>   | 59 | E I S L Y I N | S P G G S I   | T A G M A I Y D T M Q F I K P K V S T I C I G M A A S M G A F L L A A G E K G K R Y A L P N S E V M I H Q P L - - G G A Q G | 131 |
| <b>Mtb P1</b> | 59 | D I S L Y I N | S P G G S I   | S A G M A I Y D T M V L A P C D I A T Y A M C M A A S M G E F L L A A G T K G K R Y A L P H A R I L M H Q P L - - G G V T G | 131 |
| <b>Mtb P2</b> | 71 | D I T M Y I N | S P G G G F T | S L M A I Y D T M Q Y V R A D I Q T V C L G Q A A S A A A V L L A A G T P G K R M A L P N A R V L I H Q P S L S G V I Q G   | 145 |
| <b>Pa P1</b>  | 75 | D I H L Y I N | S P G G S V   | T A G M S I Y D T M Q F I K P N V S T T C I G Q A C S M G A L L L A G G A A G K R Y C L P H S R M M I H Q P L - - G G F Q G | 147 |
| <b>Pa P2</b>  | 59 | P I Y M F V N | S P G G H V   | E S G D M I F D A I R F I T P K V I M I G S C S V A S A G A L I Y A A A D K E N R Y S L P N T R F L L H Q P S - - G G I Q G | 131 |

  

|               |     | Ω                                                                                                                                               |     |
|---------------|-----|-------------------------------------------------------------------------------------------------------------------------------------------------|-----|
| <b>Ctr P1</b> | 128 | Q A T D L D I H A R E E I L K T K A R I I D V Y V E A T G Q S P E V I E K A I D R D M W M S A N E A M E F G L L D G I L F S F N D L - - - - -   | 192 |
| <b>Ctr P2</b> | 132 | T S A D I Q L Q A A E I L T L K K H L S N I L A E C T G Q S V E K I I E D S E R D F F M G A E E A I A Y G L I D K V I S S A K E T K D K S I A S | 203 |
| <b>Ec P</b>   | 145 | Q A T D I E I H A R E E I L K V K G R M N E L M A L H T G Q S L E Q I E R D T E R D R F L S A P E A V E Y G L V D S I L T H R N - - - - -       | 207 |
| <b>Bs P</b>   | 132 | Q A T E I E I A A K R I L L R D K L N K V L A E R T G Q P L E V I E R D T D R D N F K S A E E A L E Y G L I D K I L T H T E D K K - - - - -     | 197 |
| <b>Mtb P1</b> | 132 | S A A D I A I Q A E Q F A V I K K E M F R L N A E F T G Q P I E R I E A D S D R D R W F T A A E A L E Y G F V D H I I T R A H V N G E A Q - - - | 200 |
| <b>Mtb P2</b> | 146 | Q F S D L E I Q A A E I E R M R T L M E T T L A R H T G K D A G V I R K D T D R D K I L T A E E A K D Y G I I D T V L E Y R K L S A Q T A - - - | 214 |
| <b>Pa P1</b>  | 148 | Q A S D I E I H A K E E I L F I K E R L N Q I L A H H T G Q P L D V I A R D T D R D R F M S G D E A V K Y G L I D K V M T Q R D L A V - - - - - | 213 |
| <b>Pa P2</b>  | 132 | P A S N I E I Y R R E I V R M K E R L D R I F A E A T G Q T P E K I S A D T E R D F W L N A E E A V Q Y G L V N K I I V S E R E I T L P G Q - - | 201 |

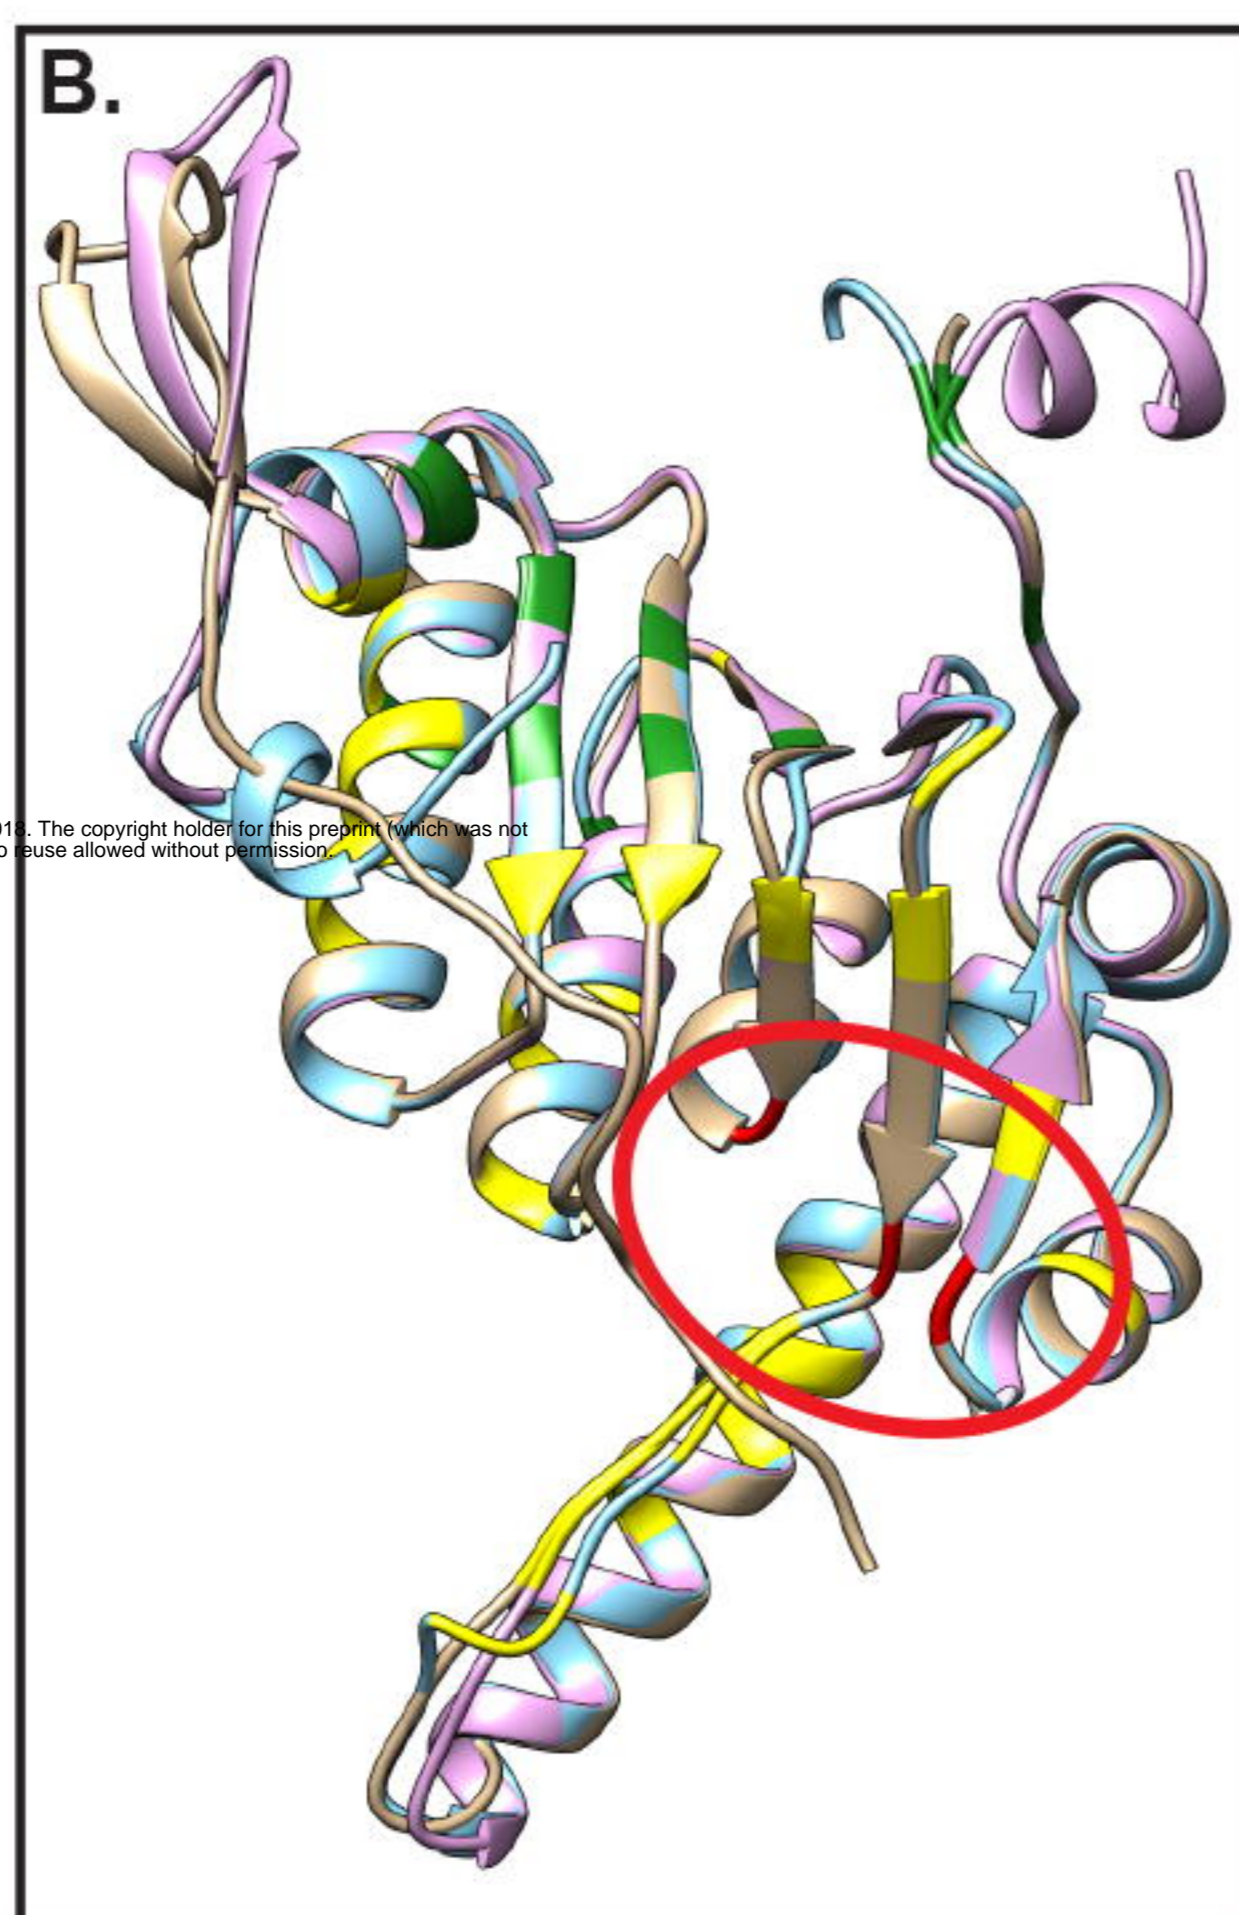

**Oligomer Interface**  
**Catalytic Triad**  
**Hydrophobic Docking Site**

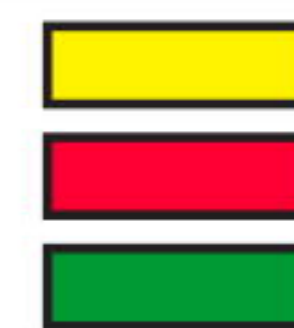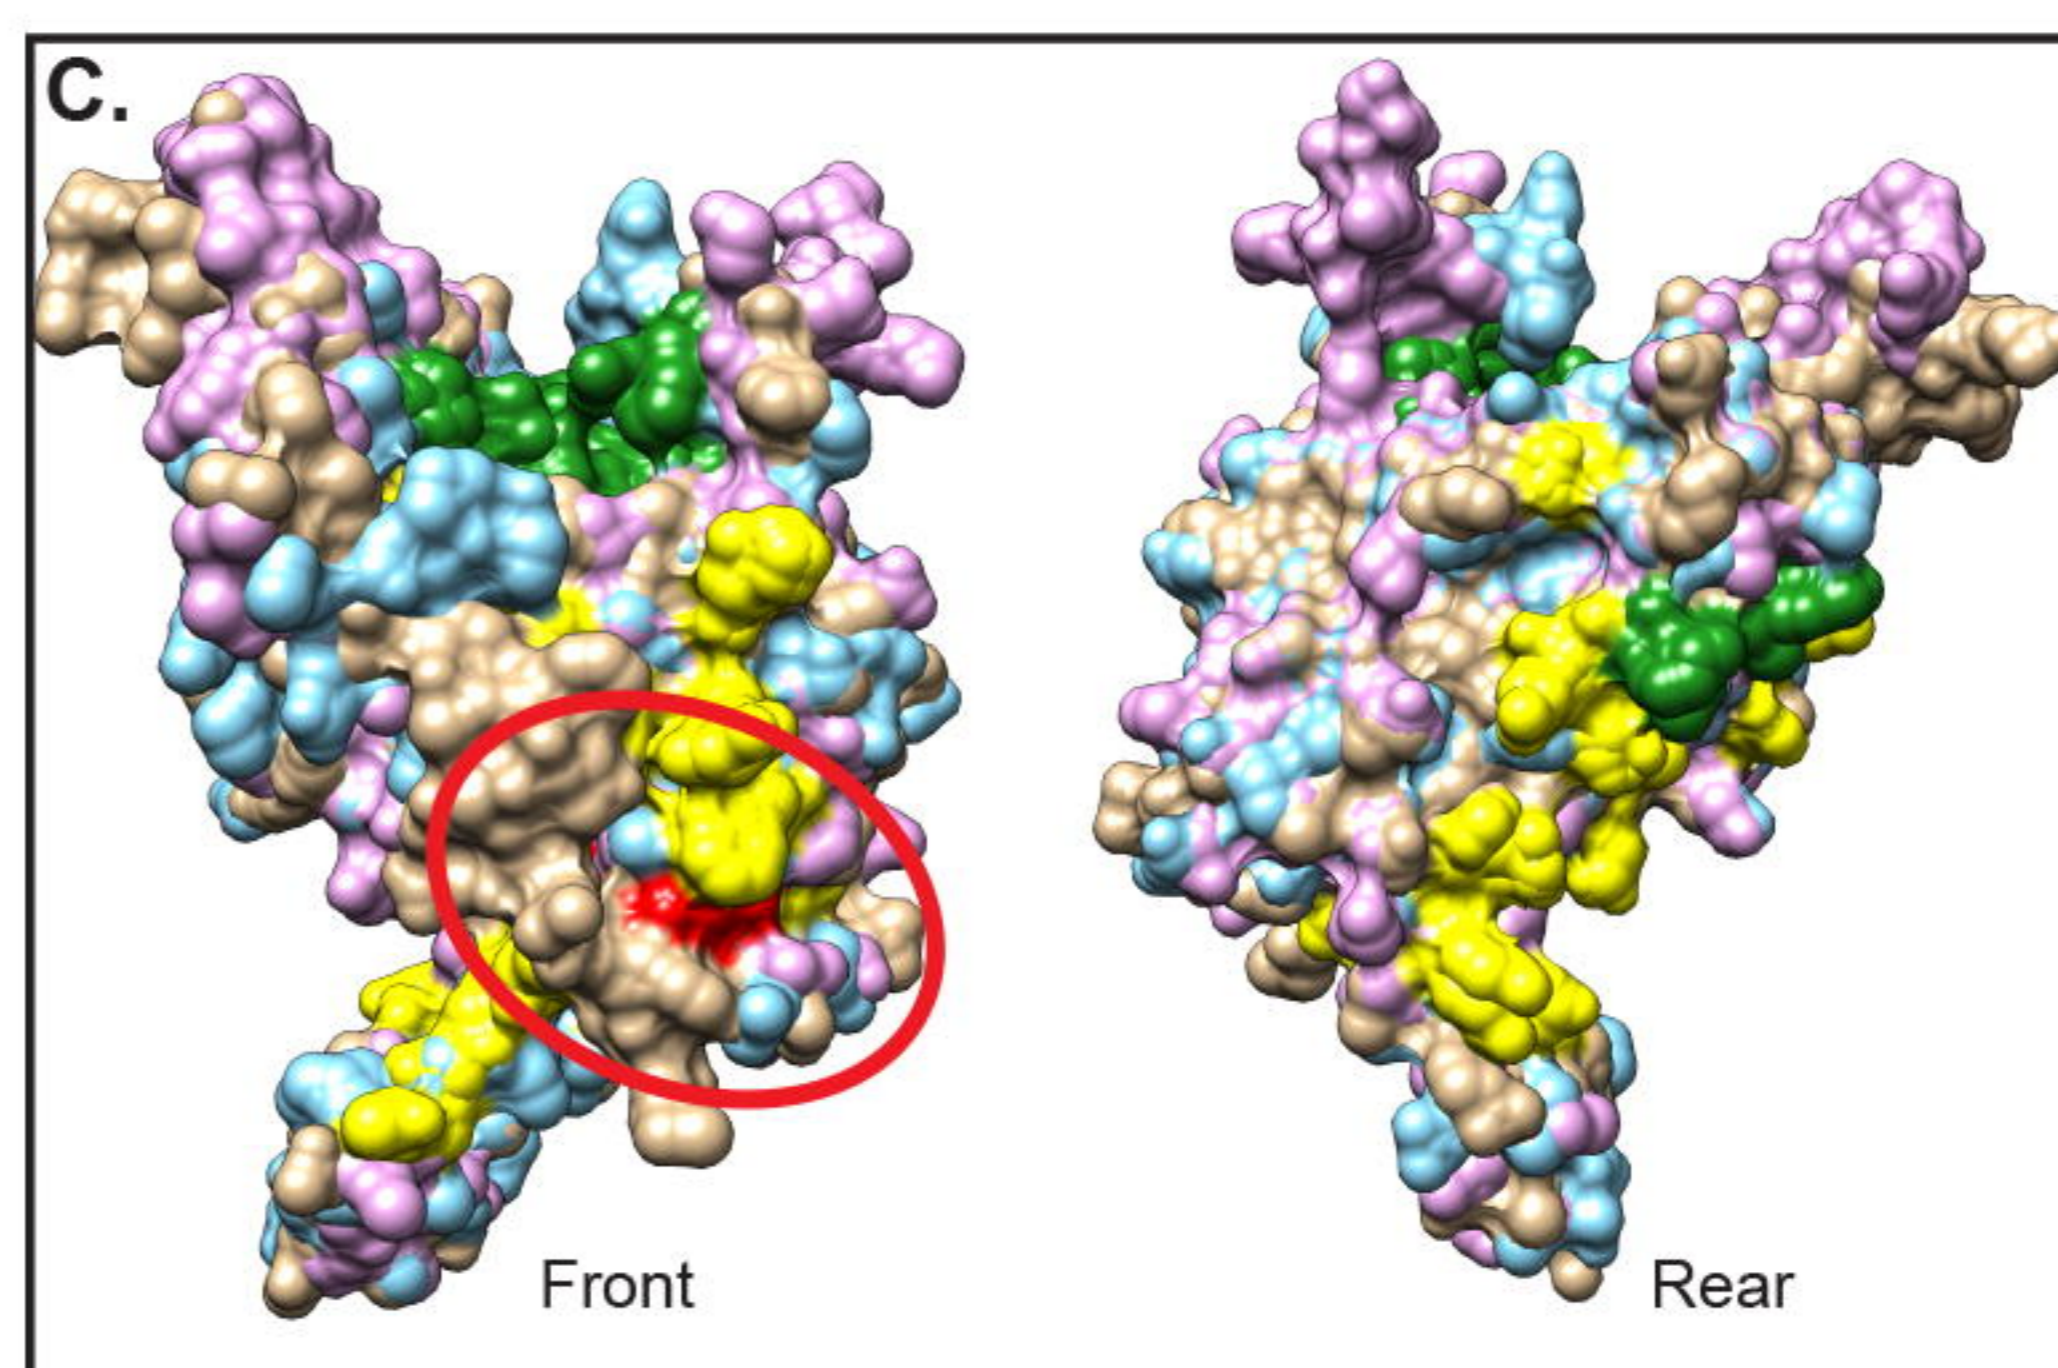

bioRxiv preprint doi: <https://doi.org/10.1101/379487>; this version posted October 17, 2018. The copyright holder for this preprint (which was not certified by peer review) is the author/funder. All rights reserved. No reuse allowed without permission.

Fig. 2

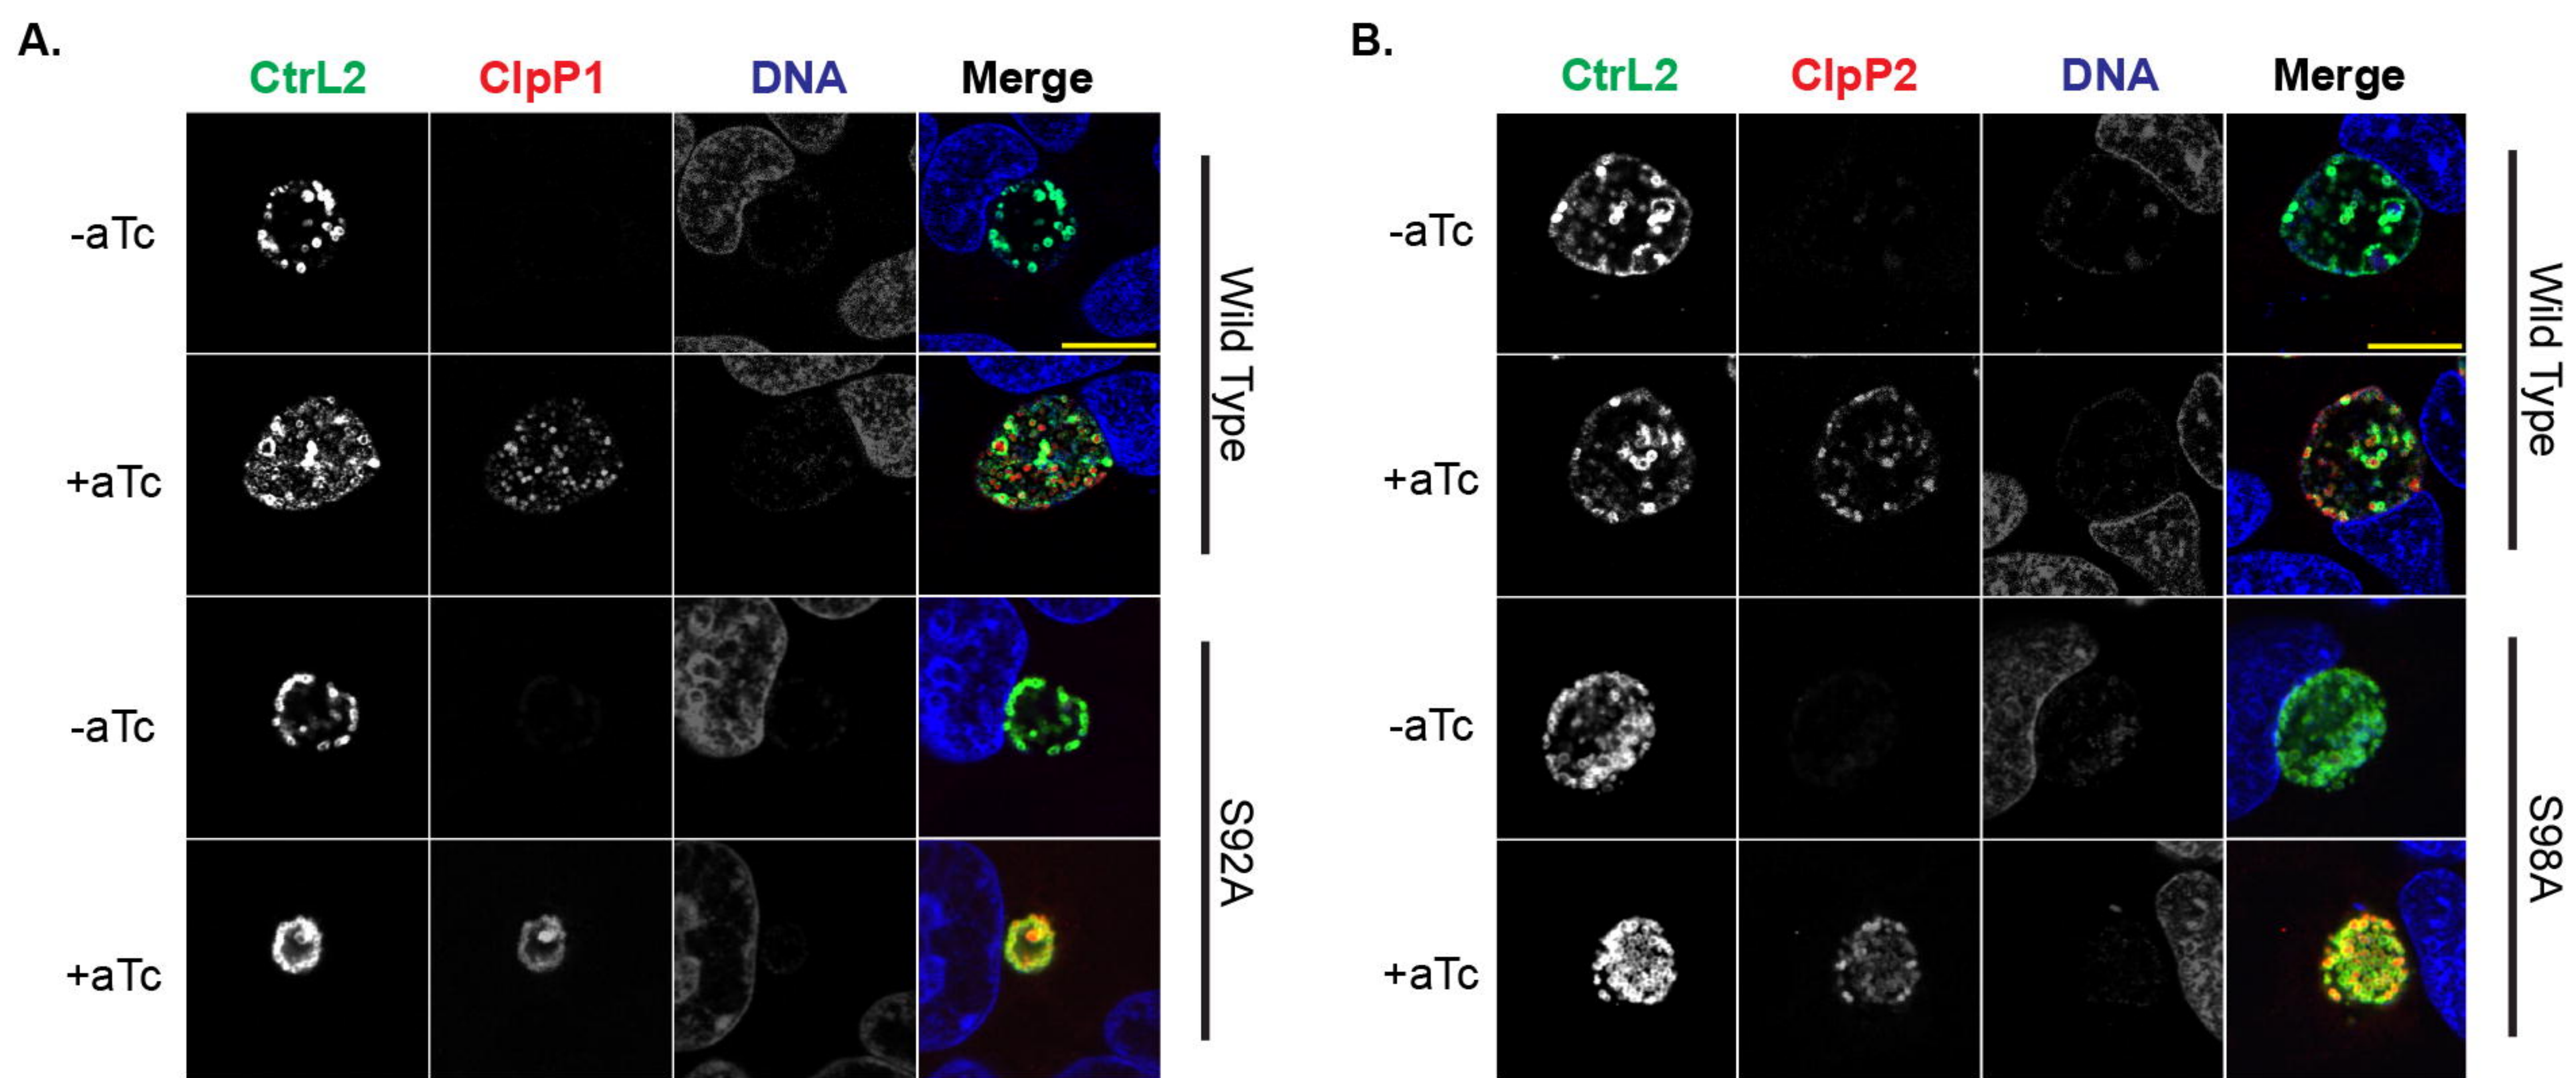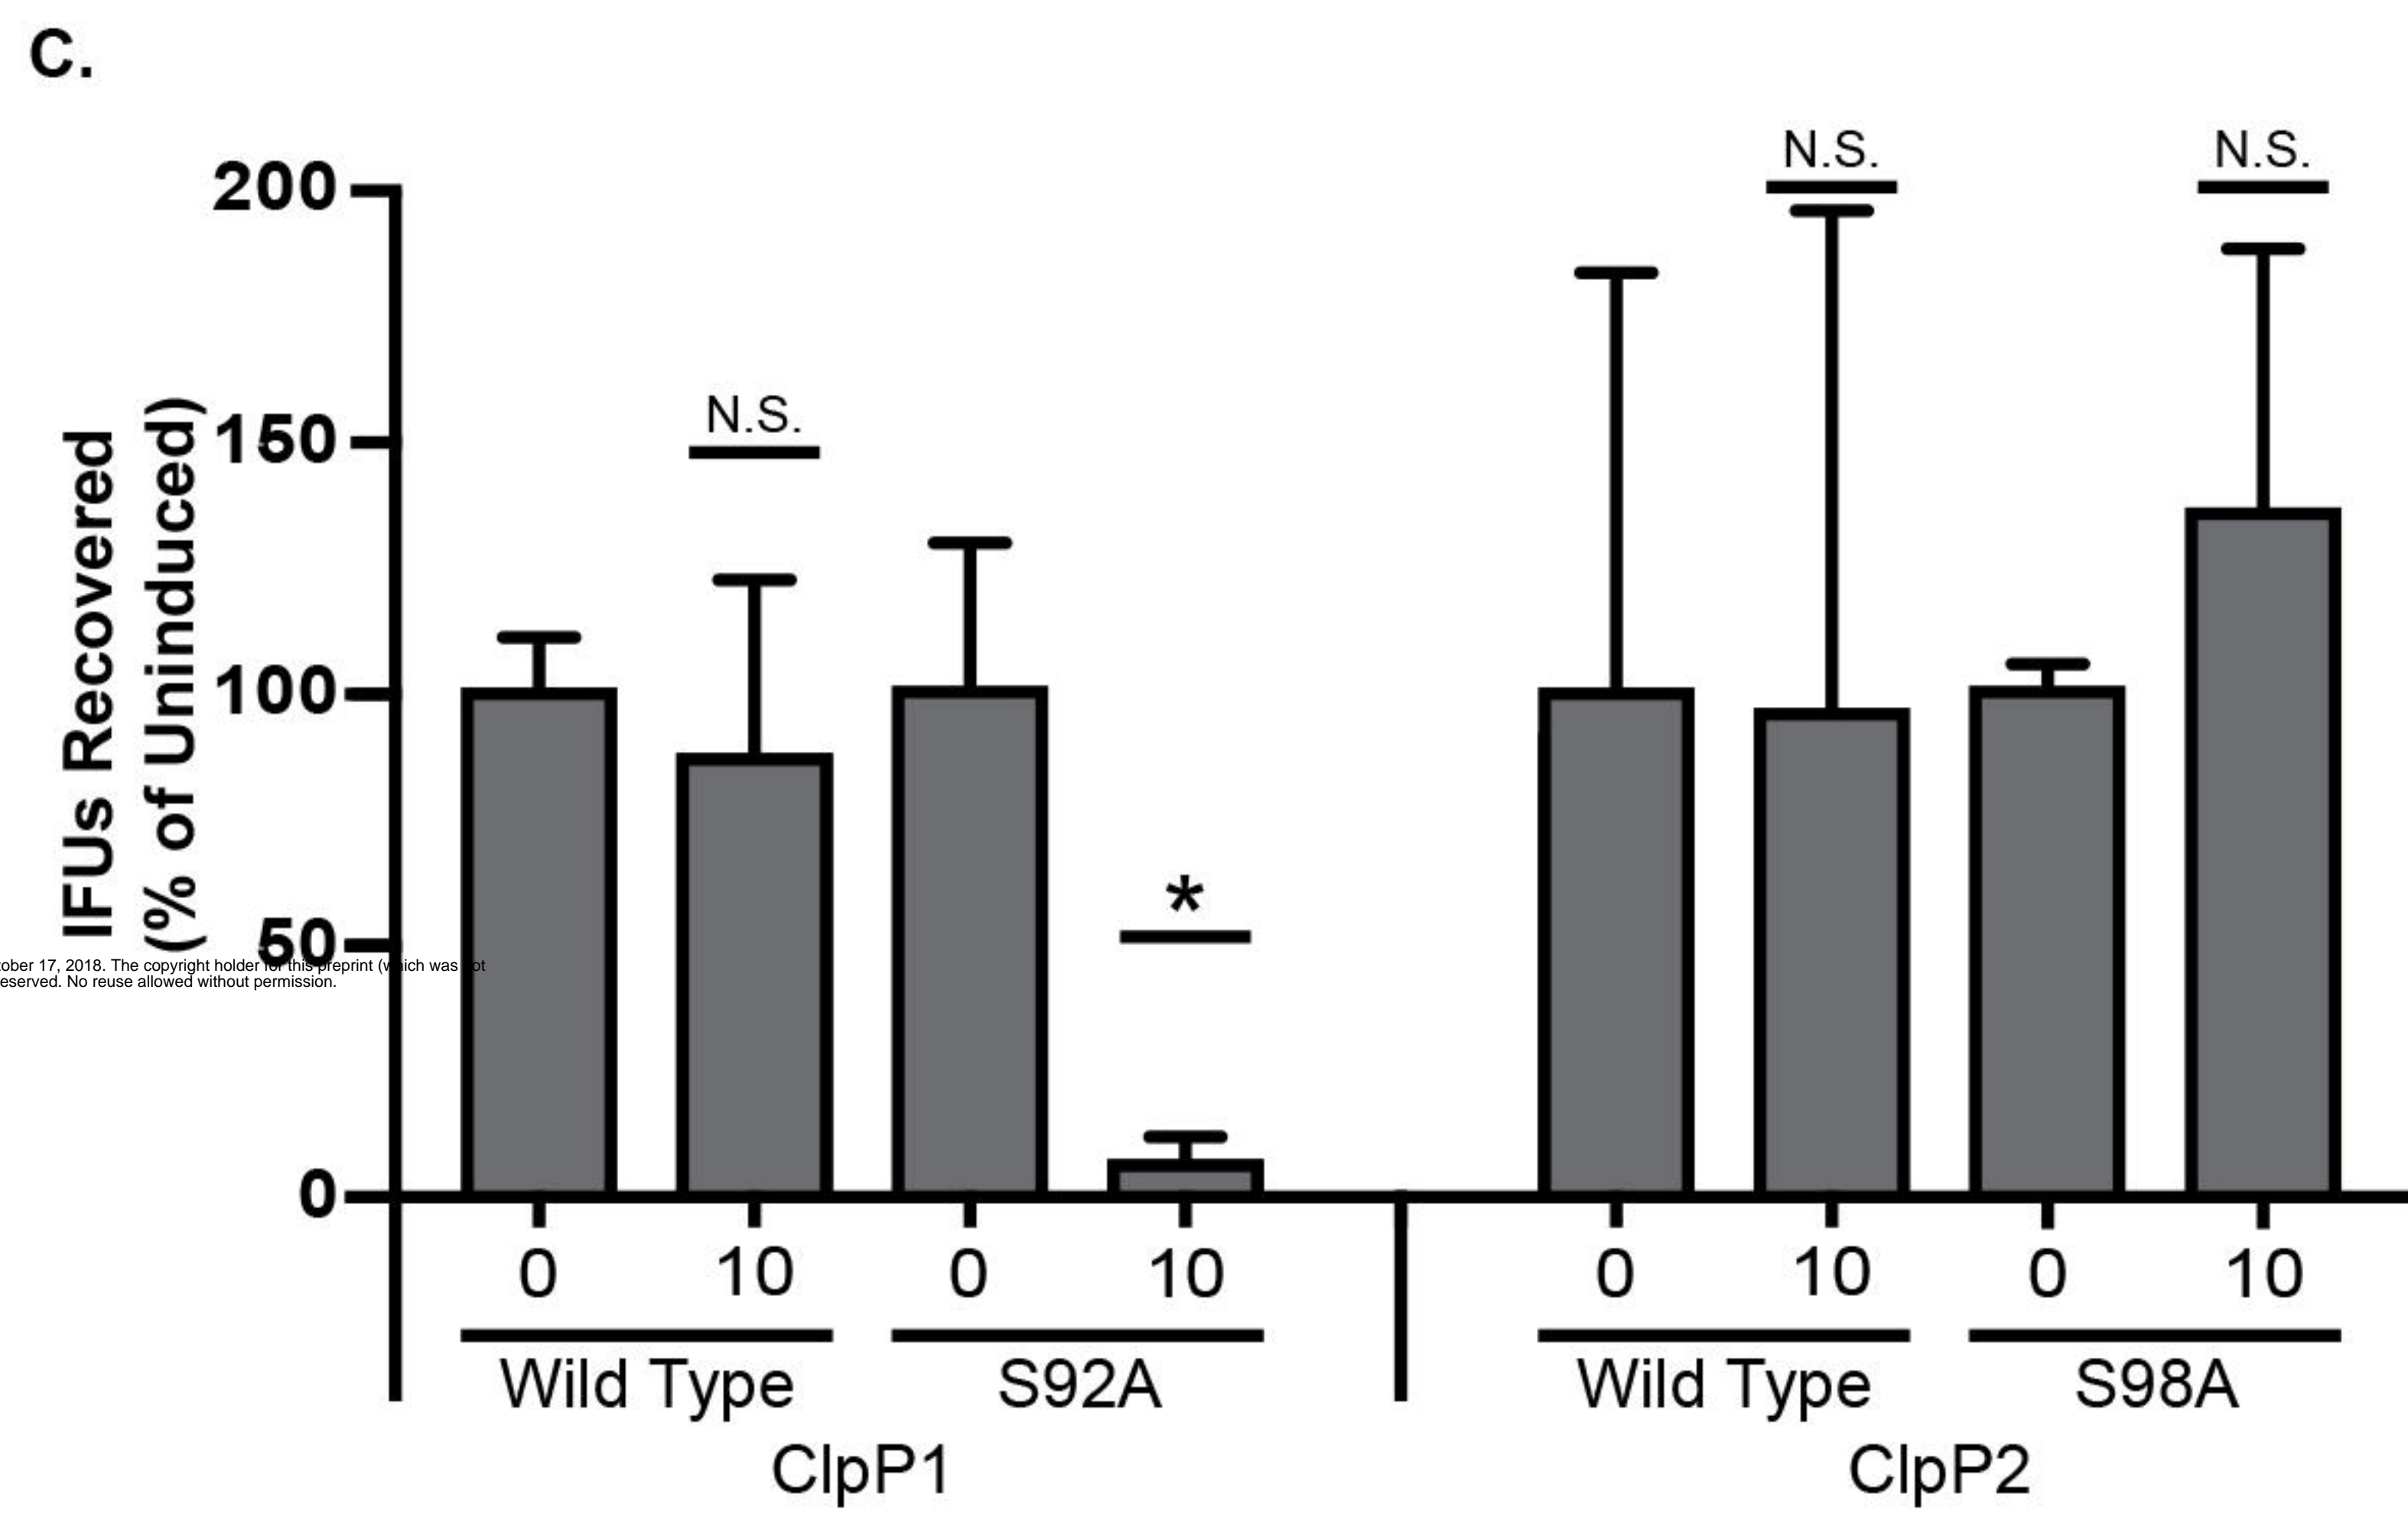

bioRxiv preprint doi: <https://doi.org/10.1101/379487>; this version posted October 17, 2018. The copyright holder for this preprint (which was not certified by peer review) is the author/funder. All rights reserved. No reuse allowed without permission.

Fig. 3



A.

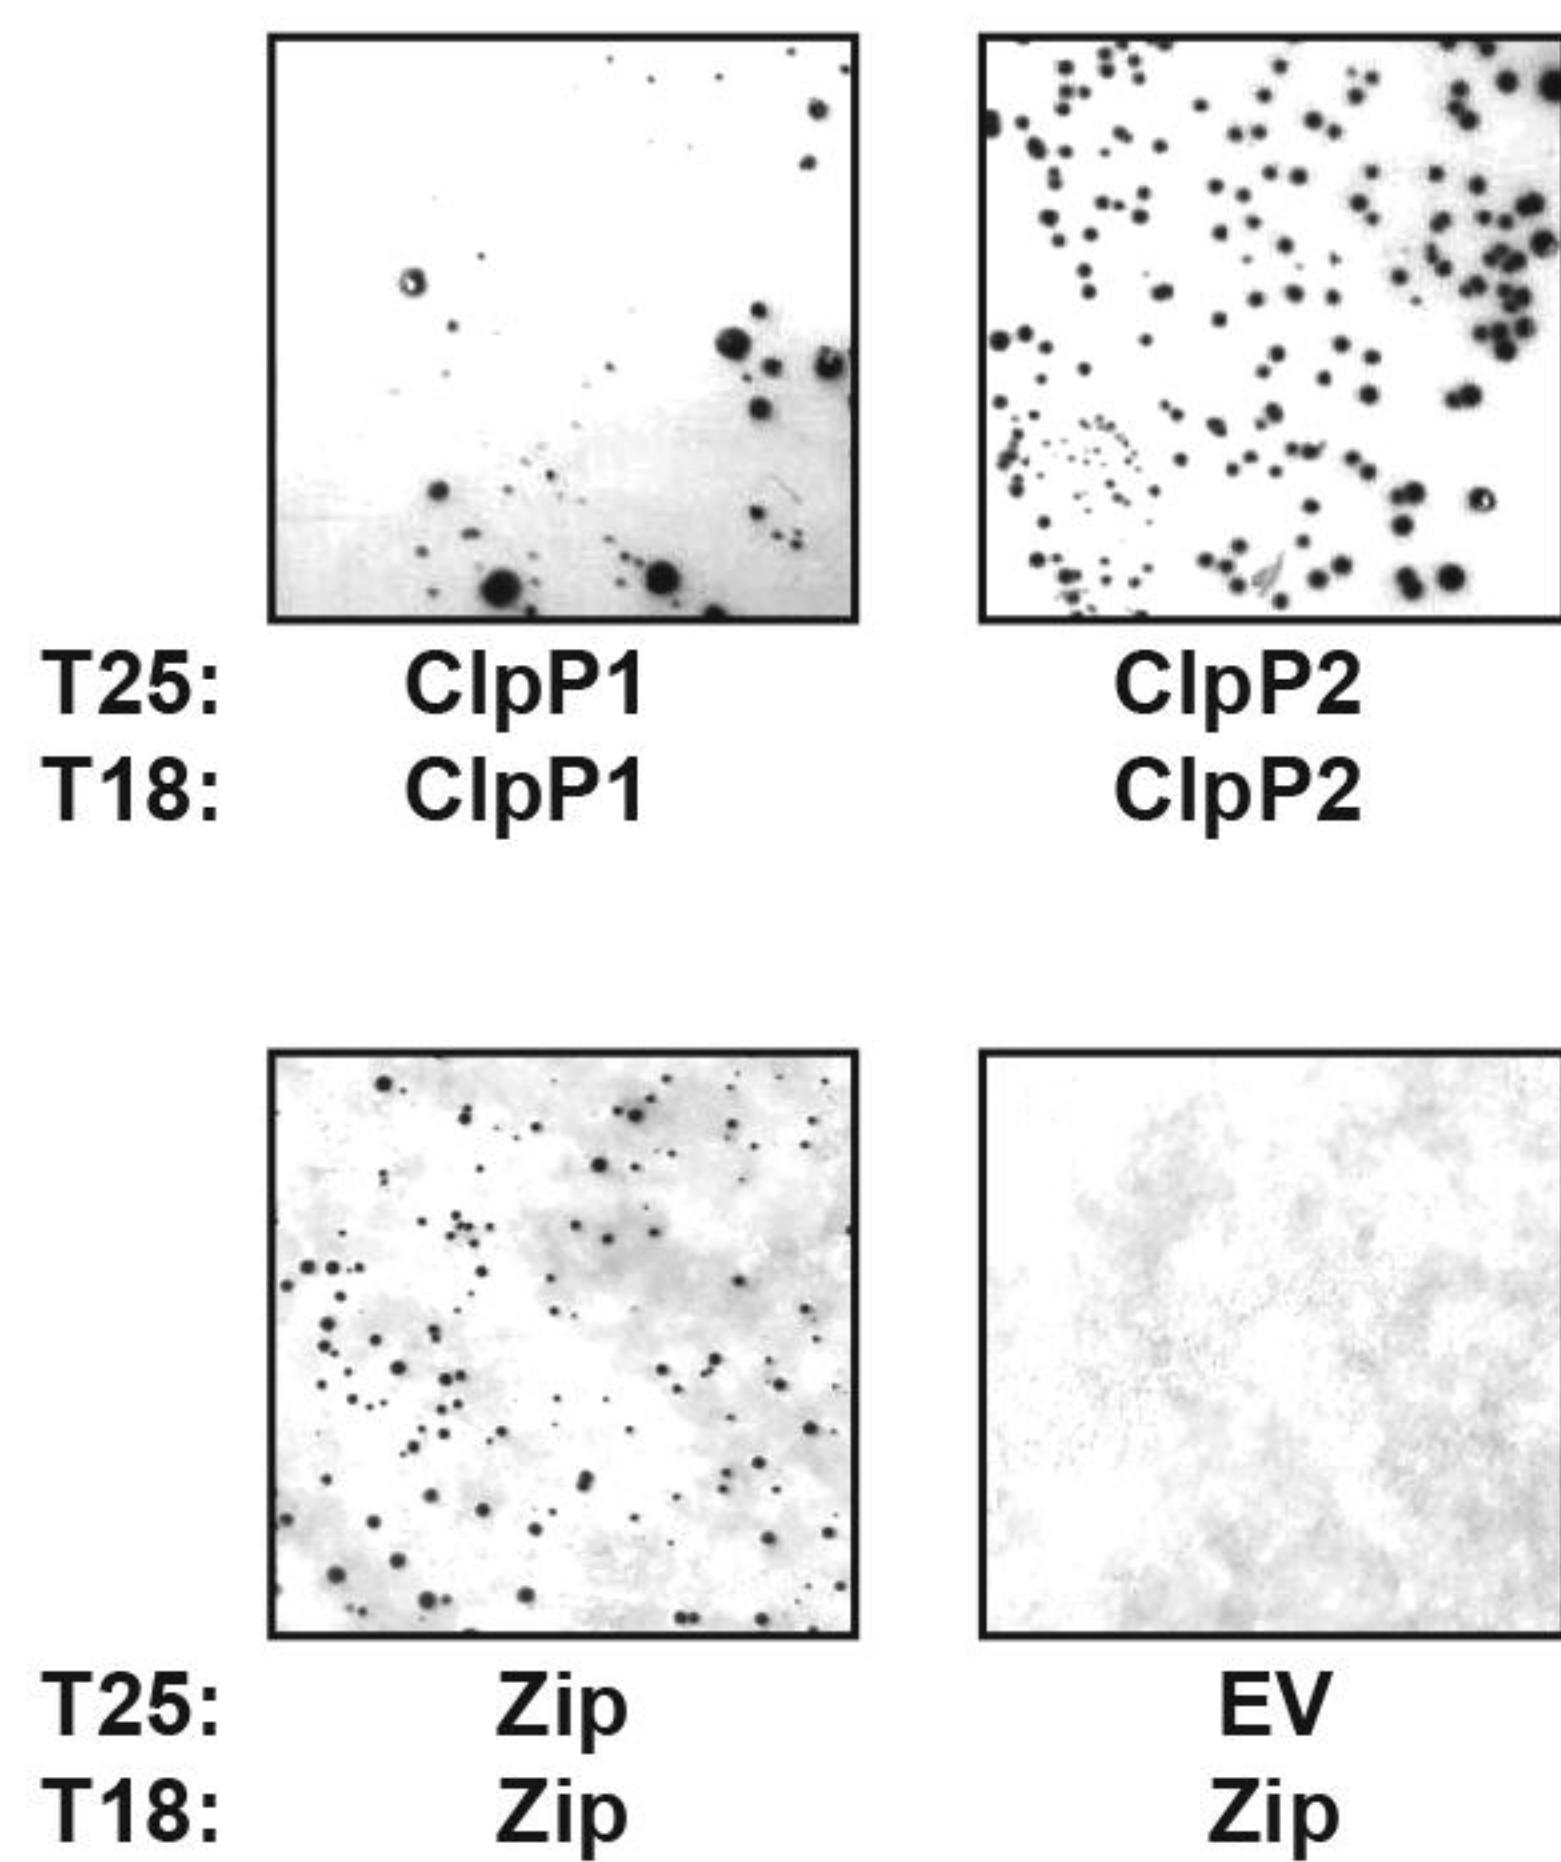

B.

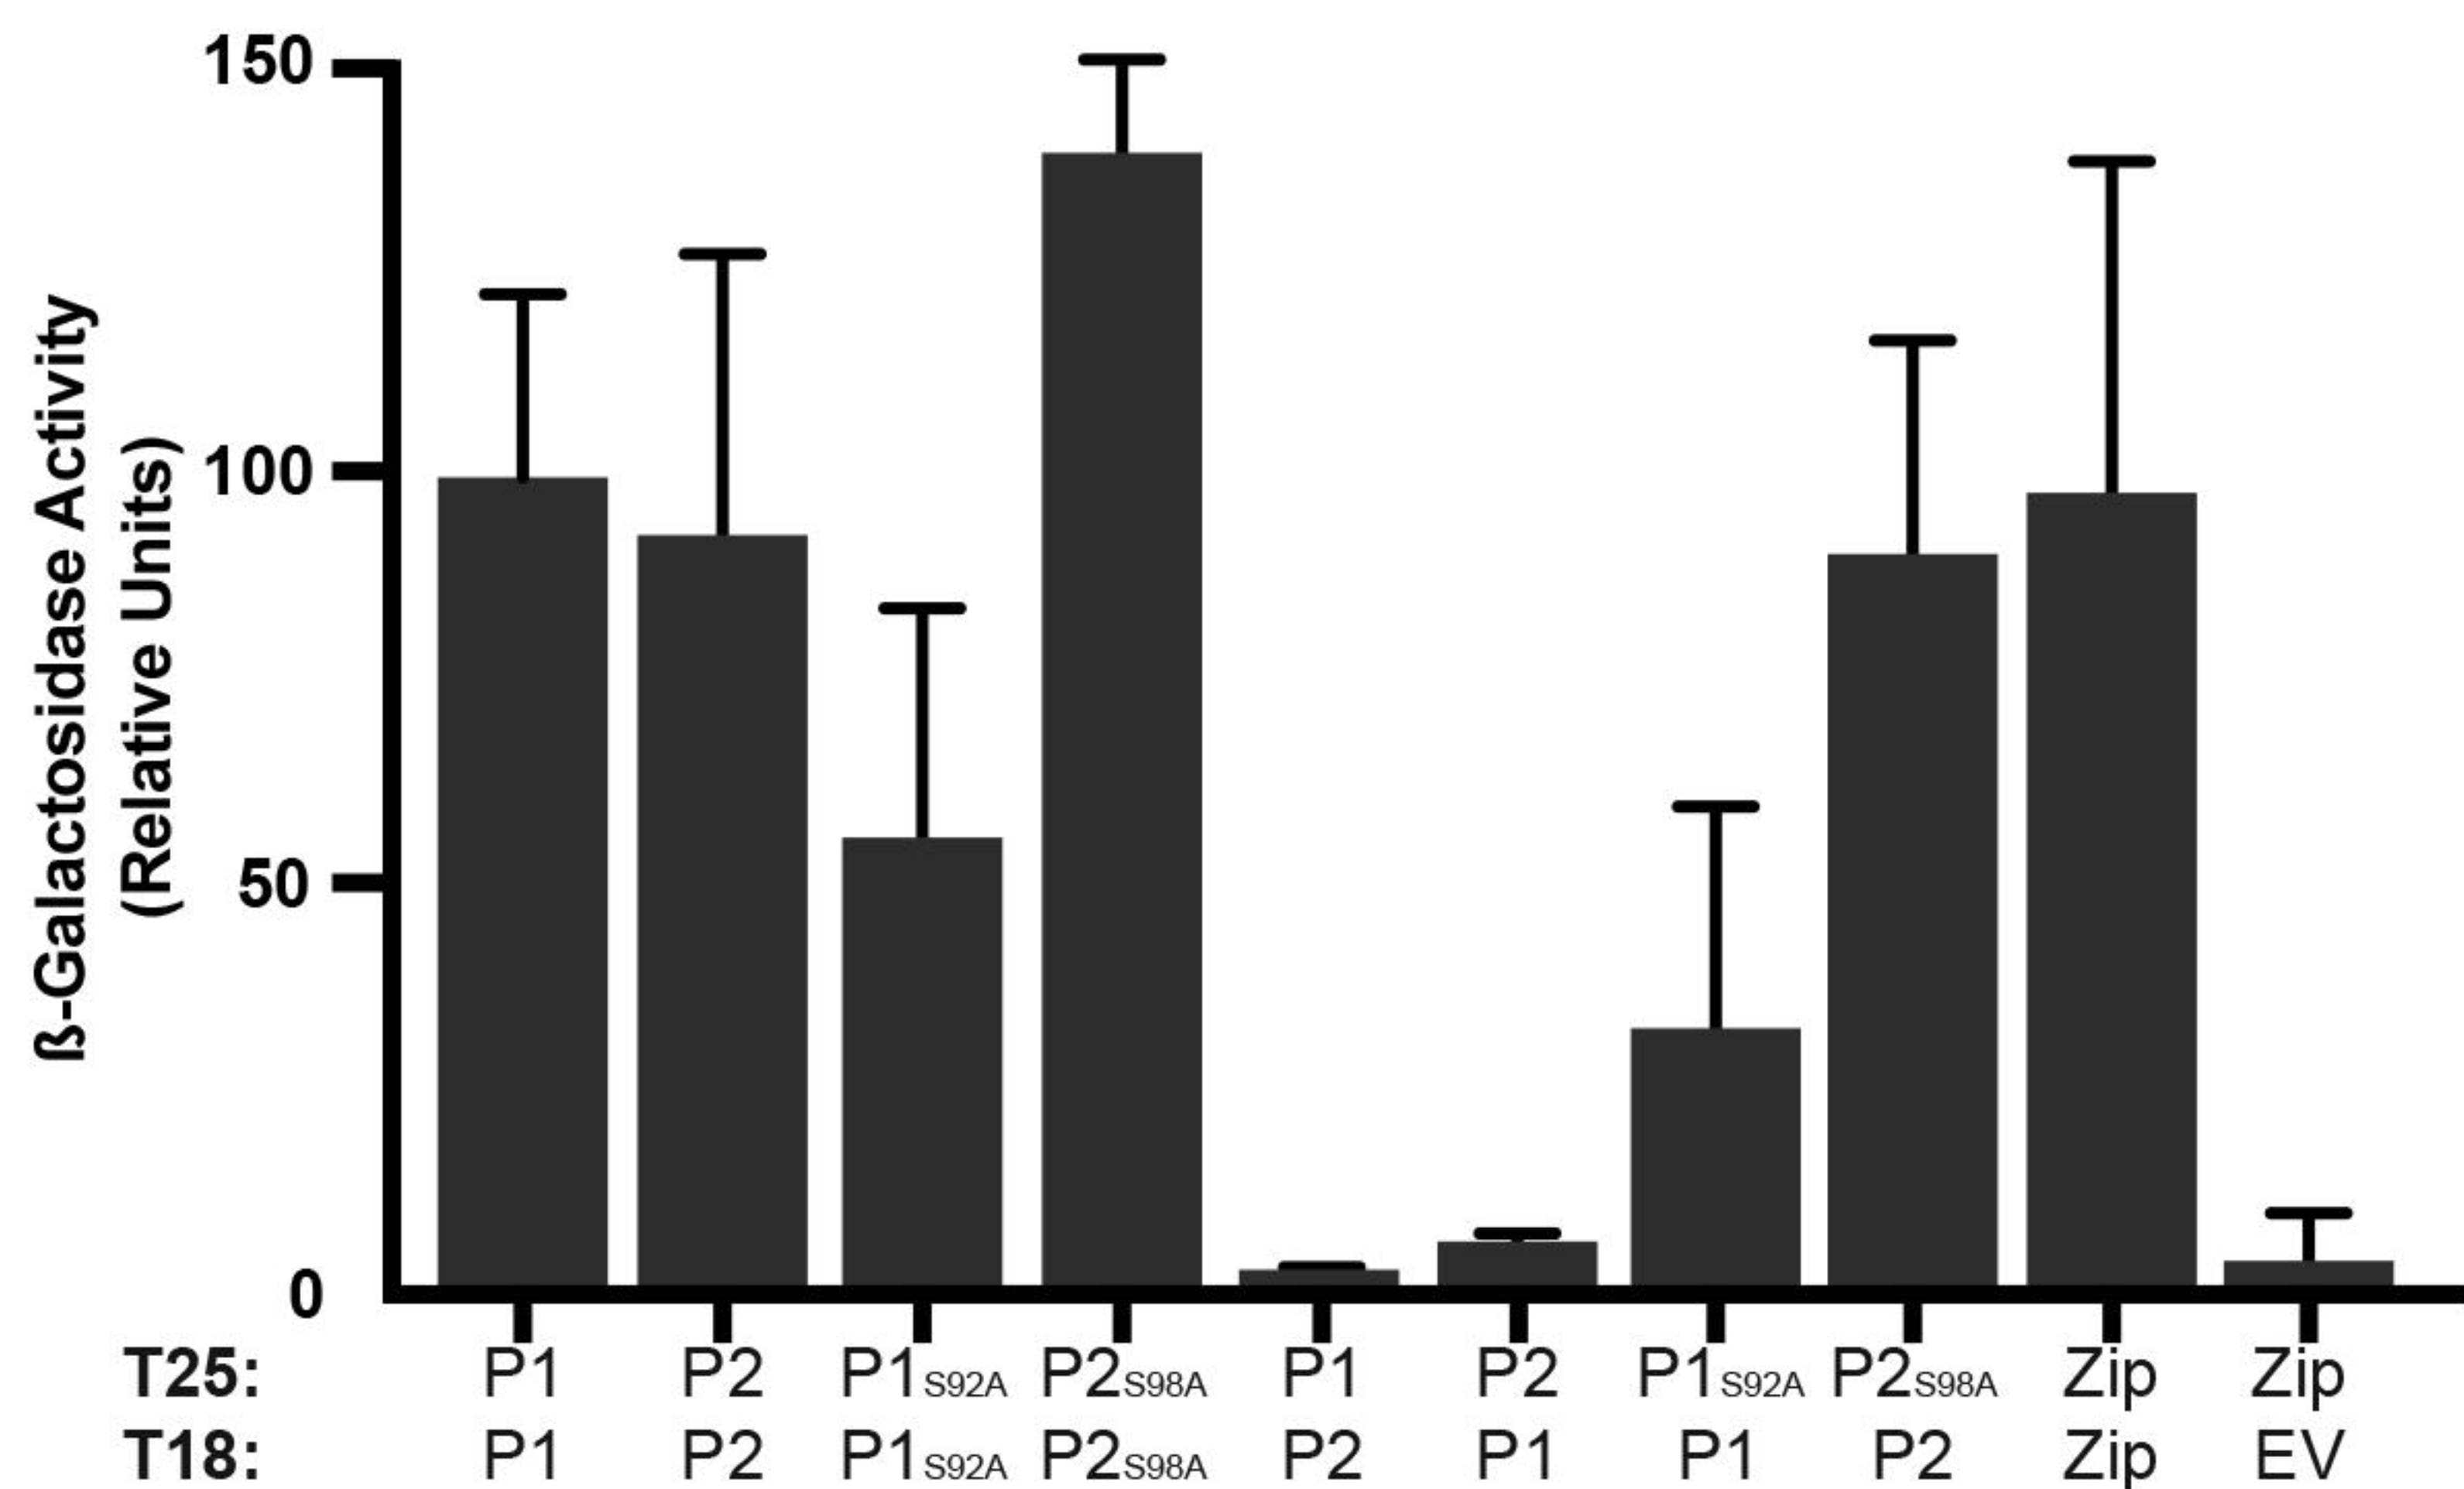

C.

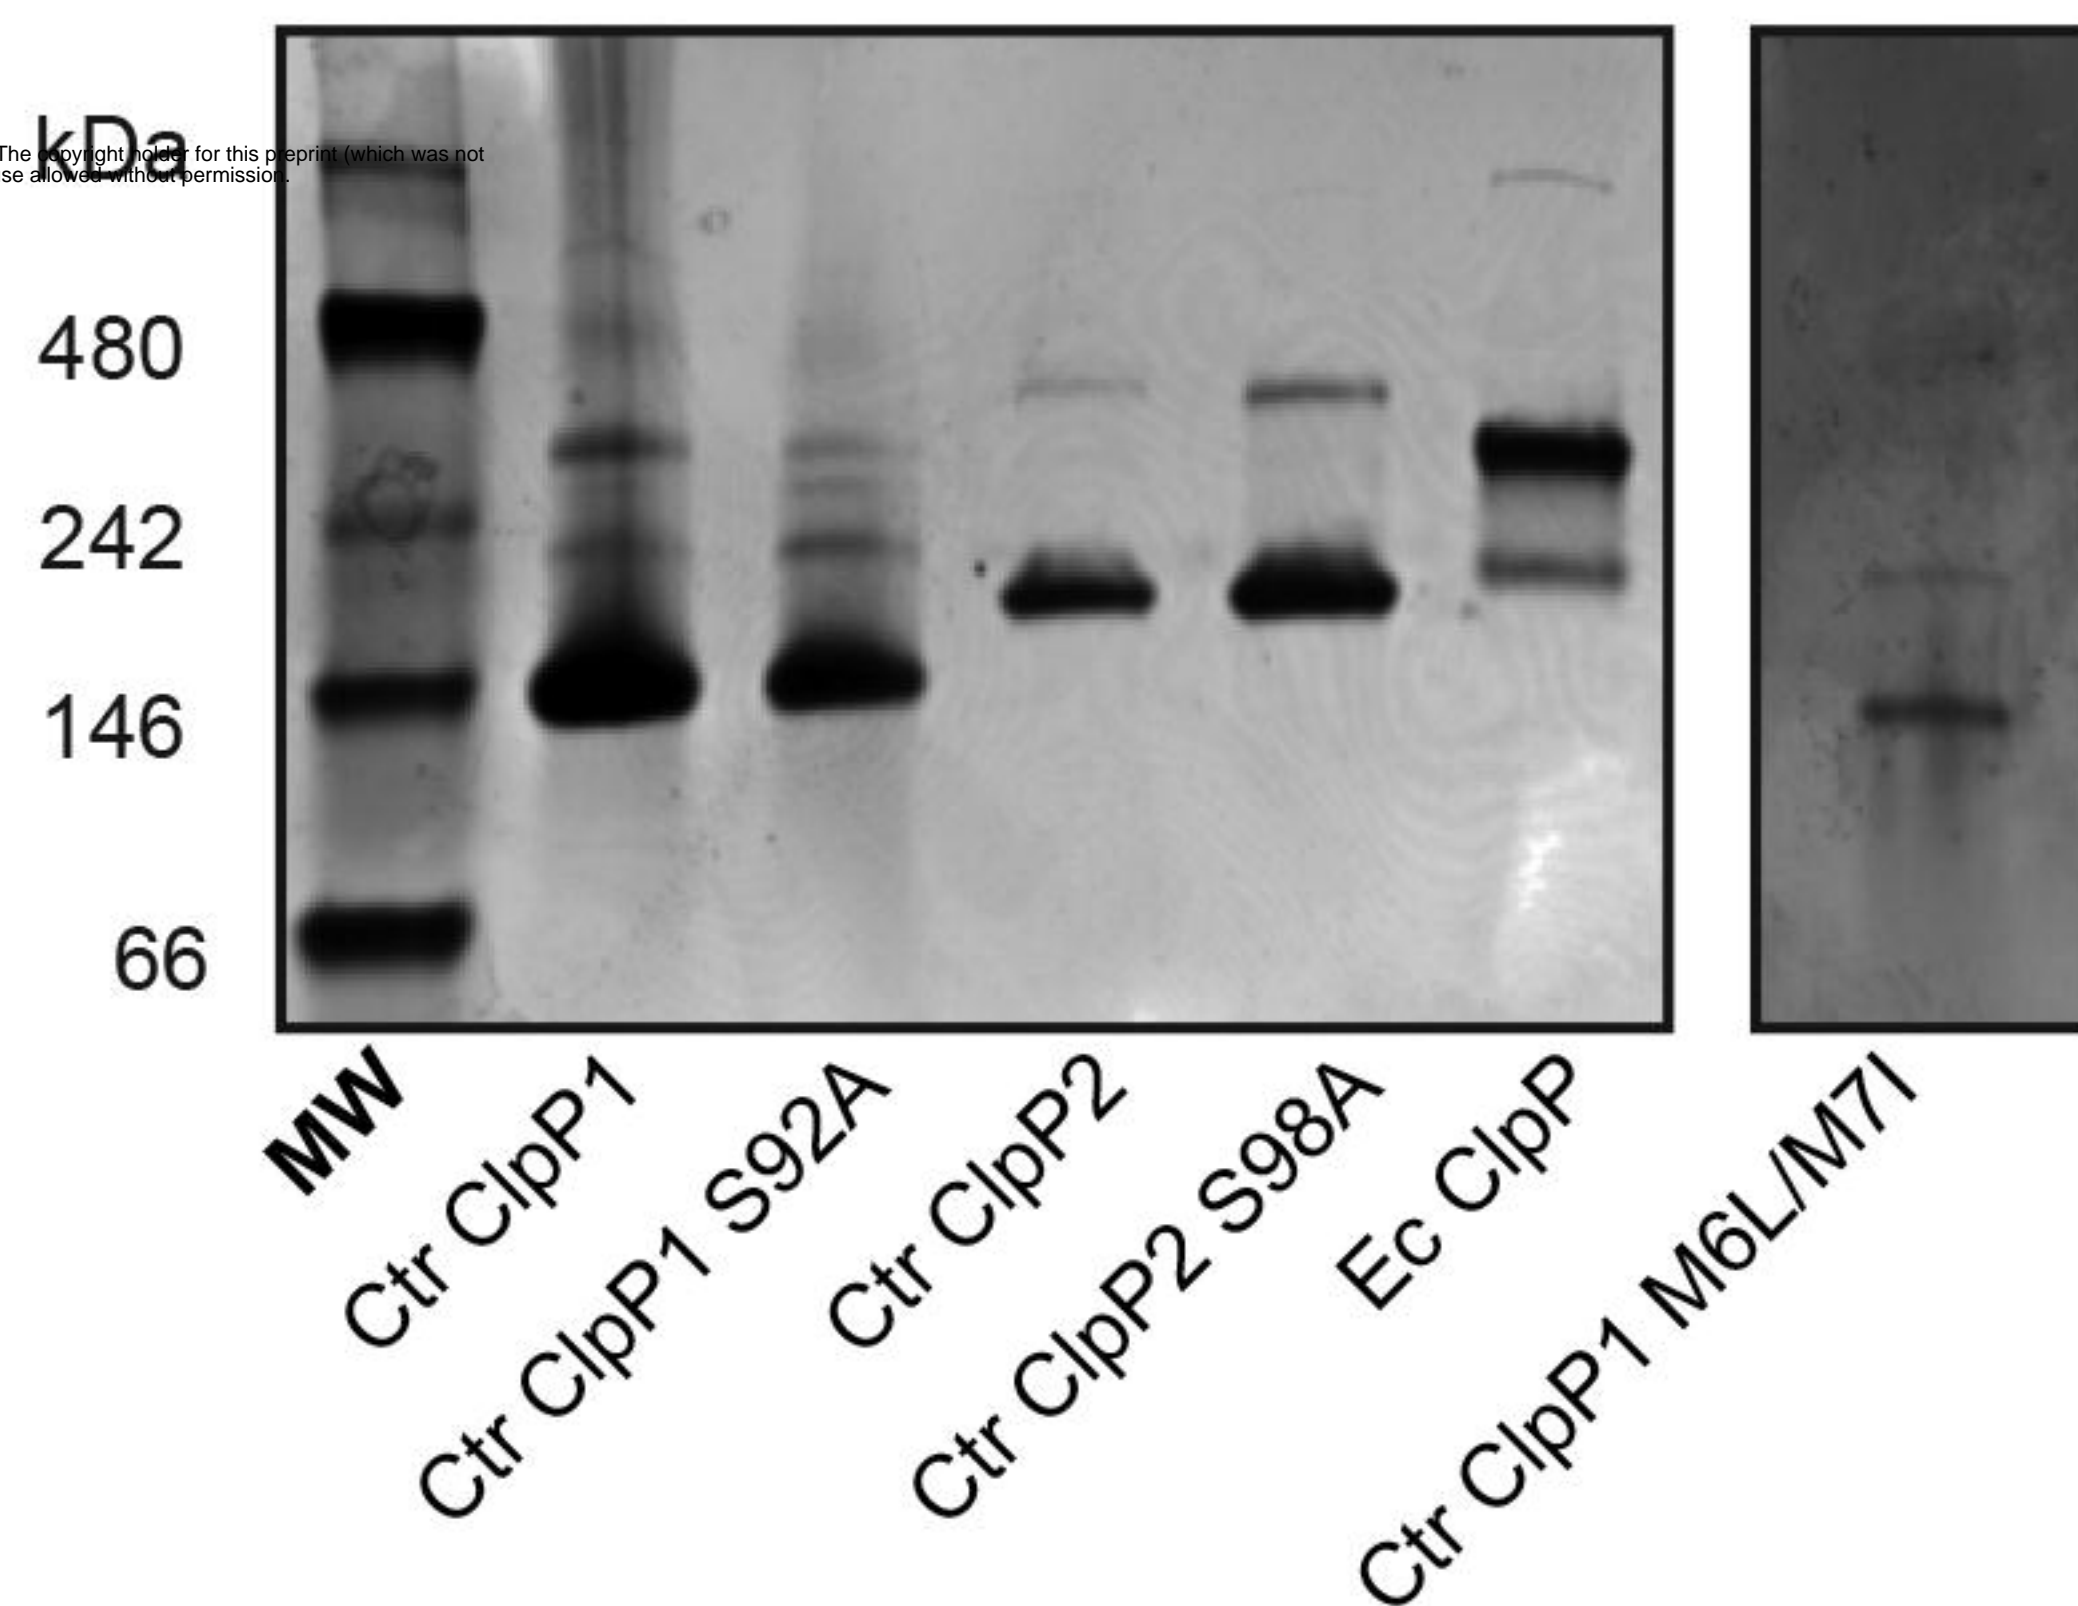

D.

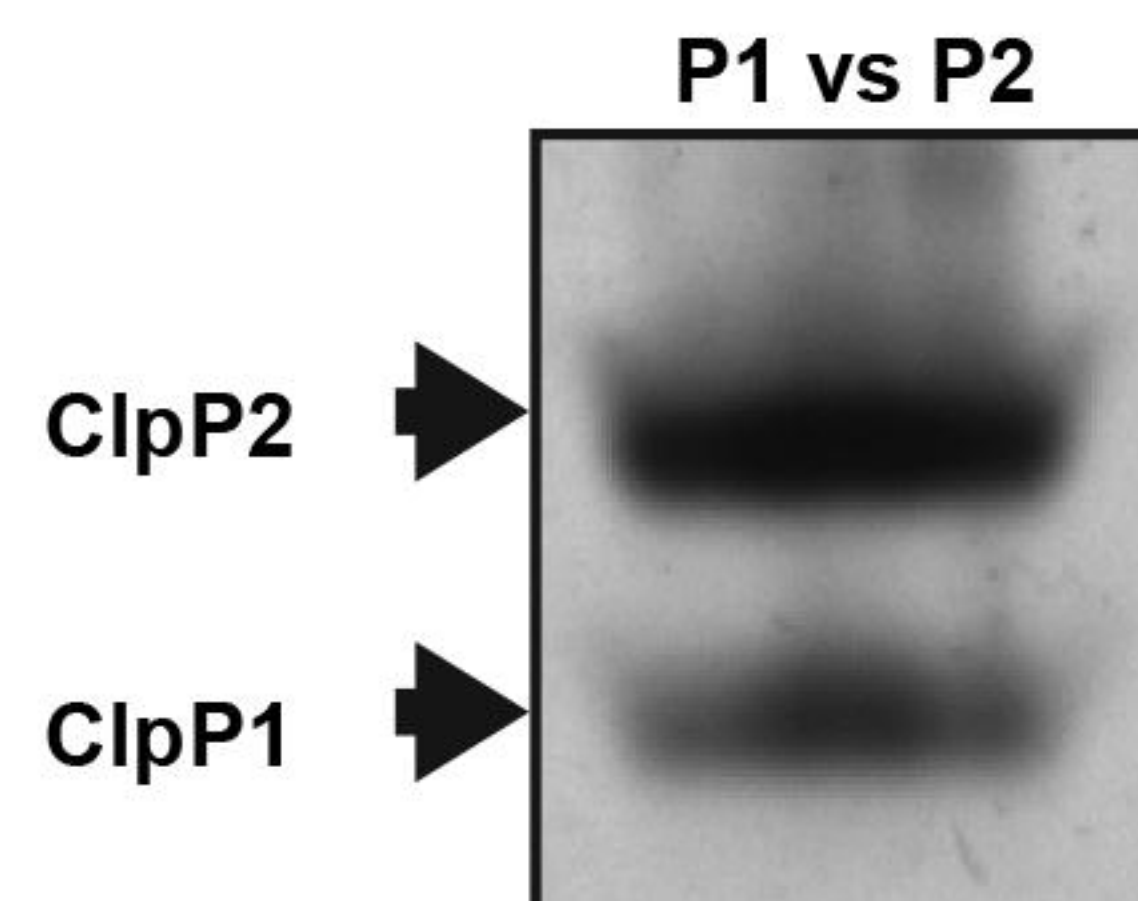

Fig. 4

A.

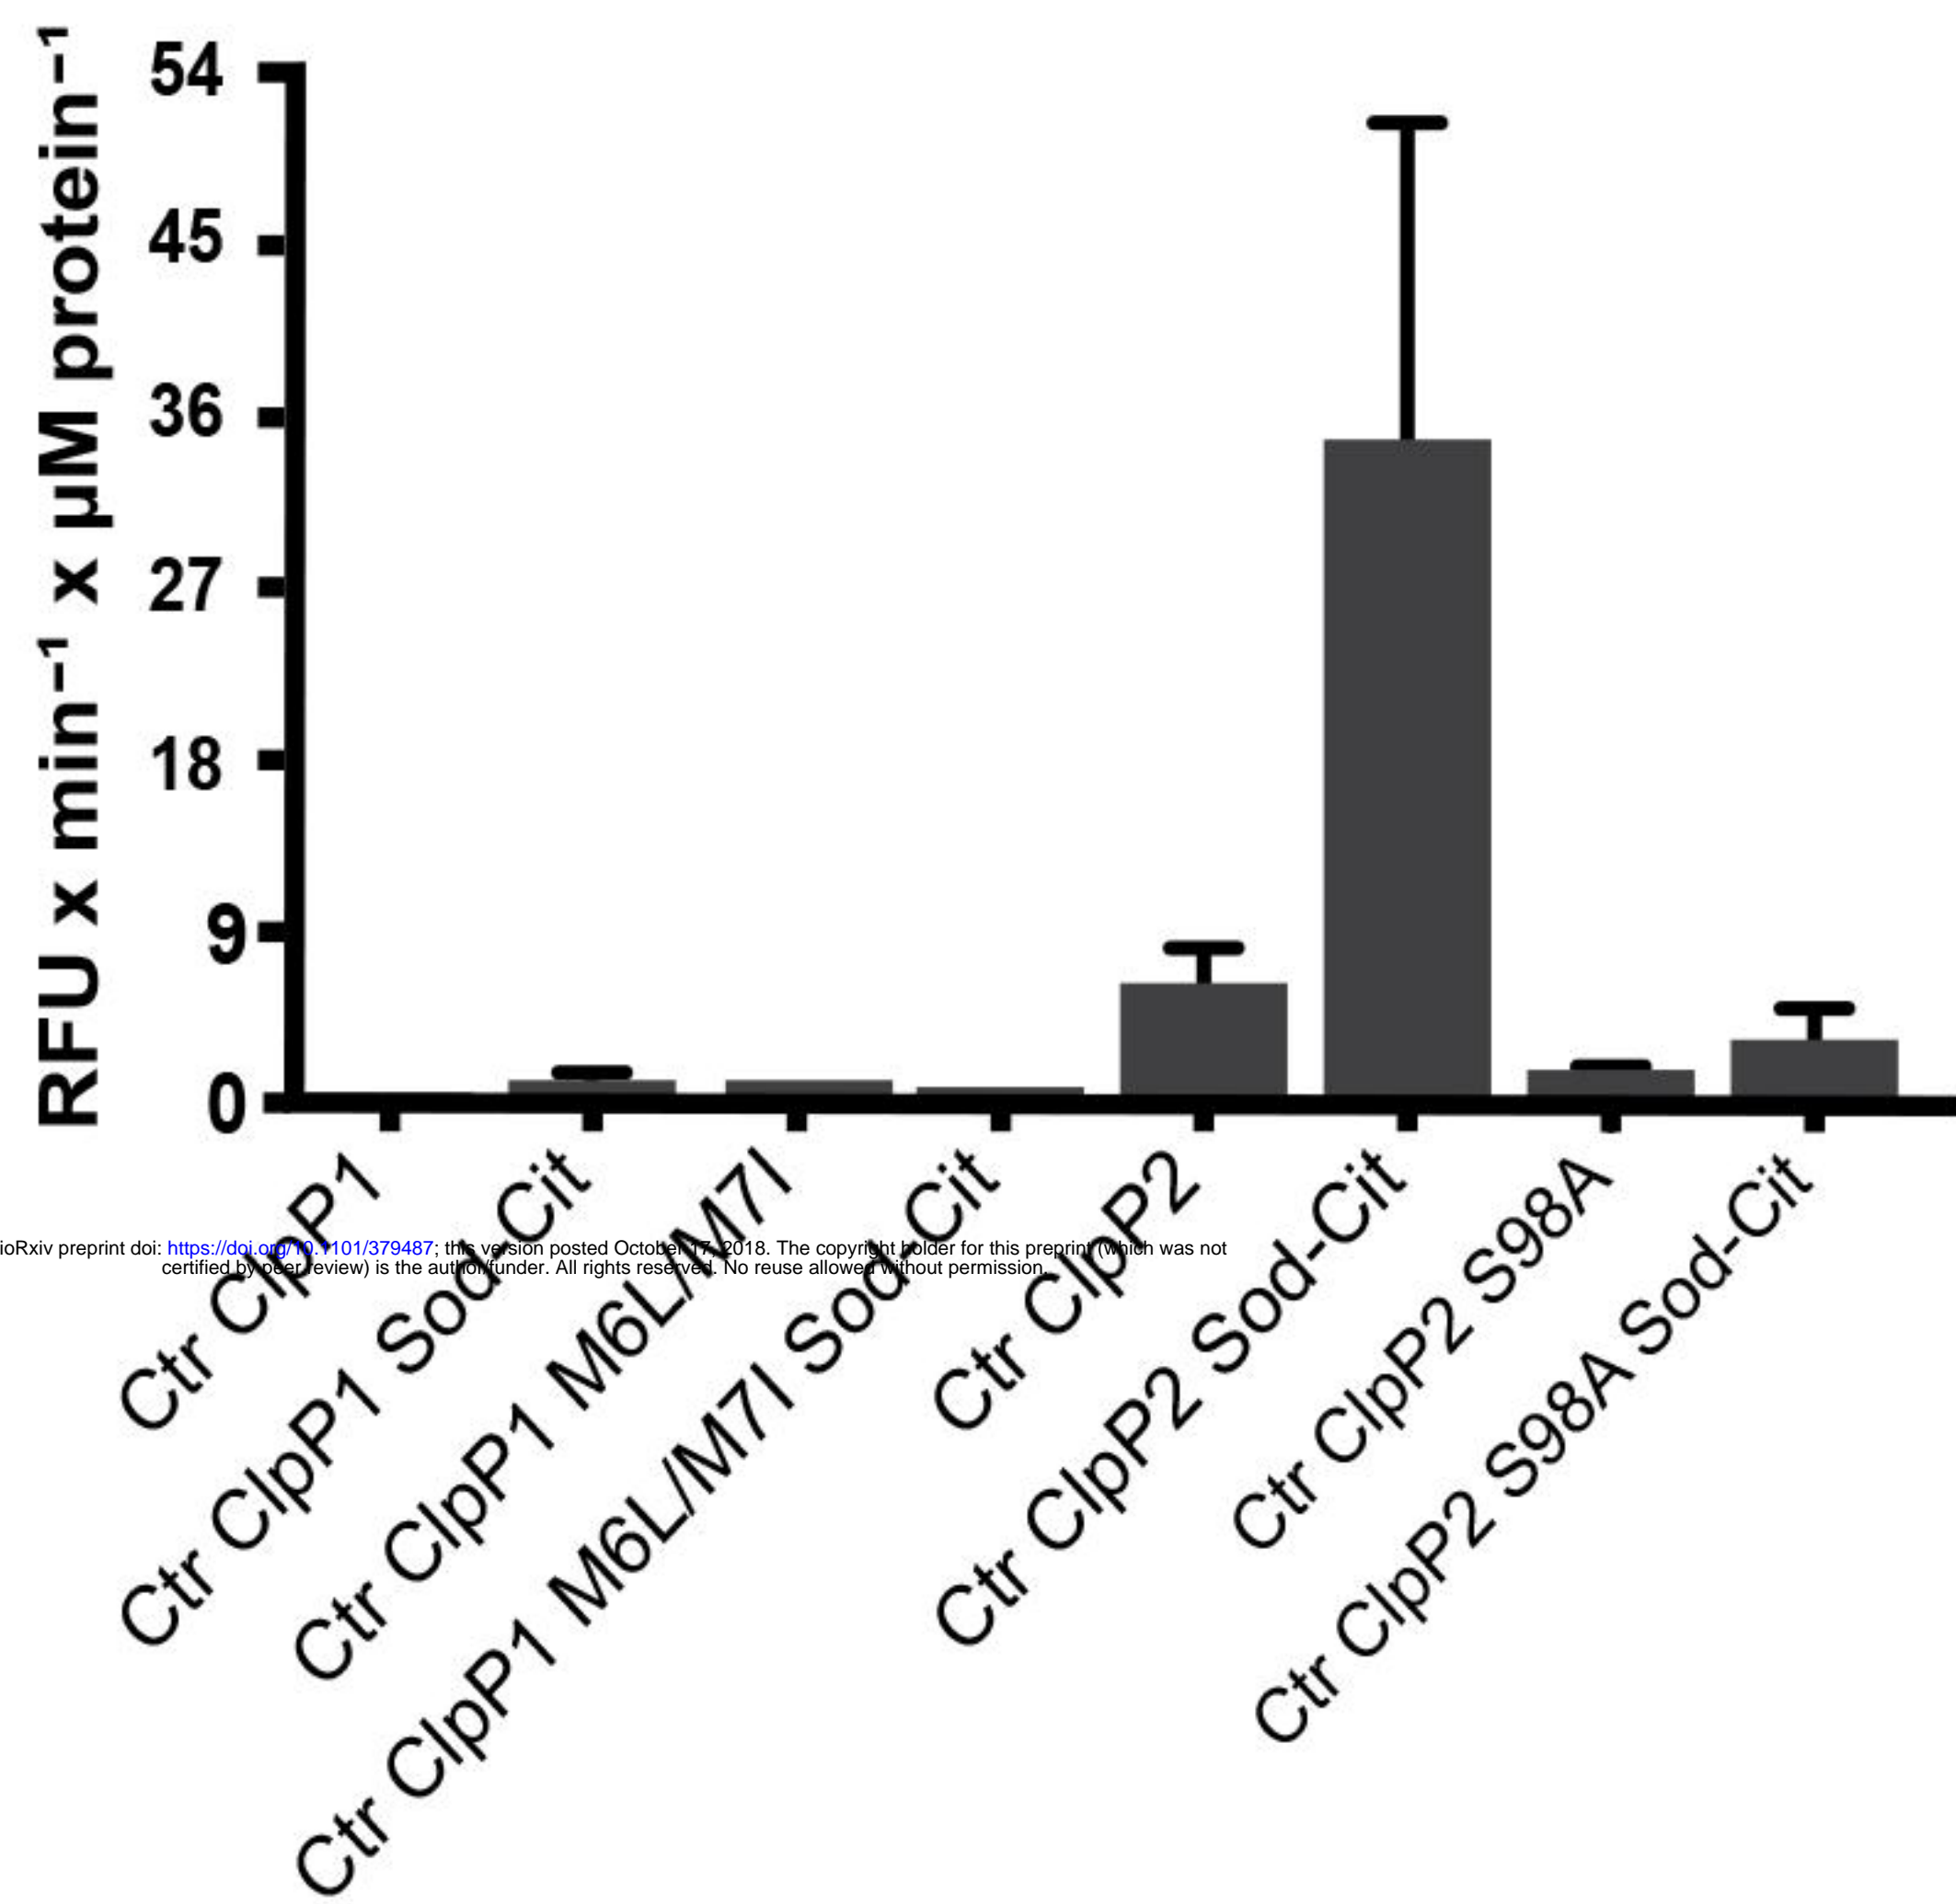

B.

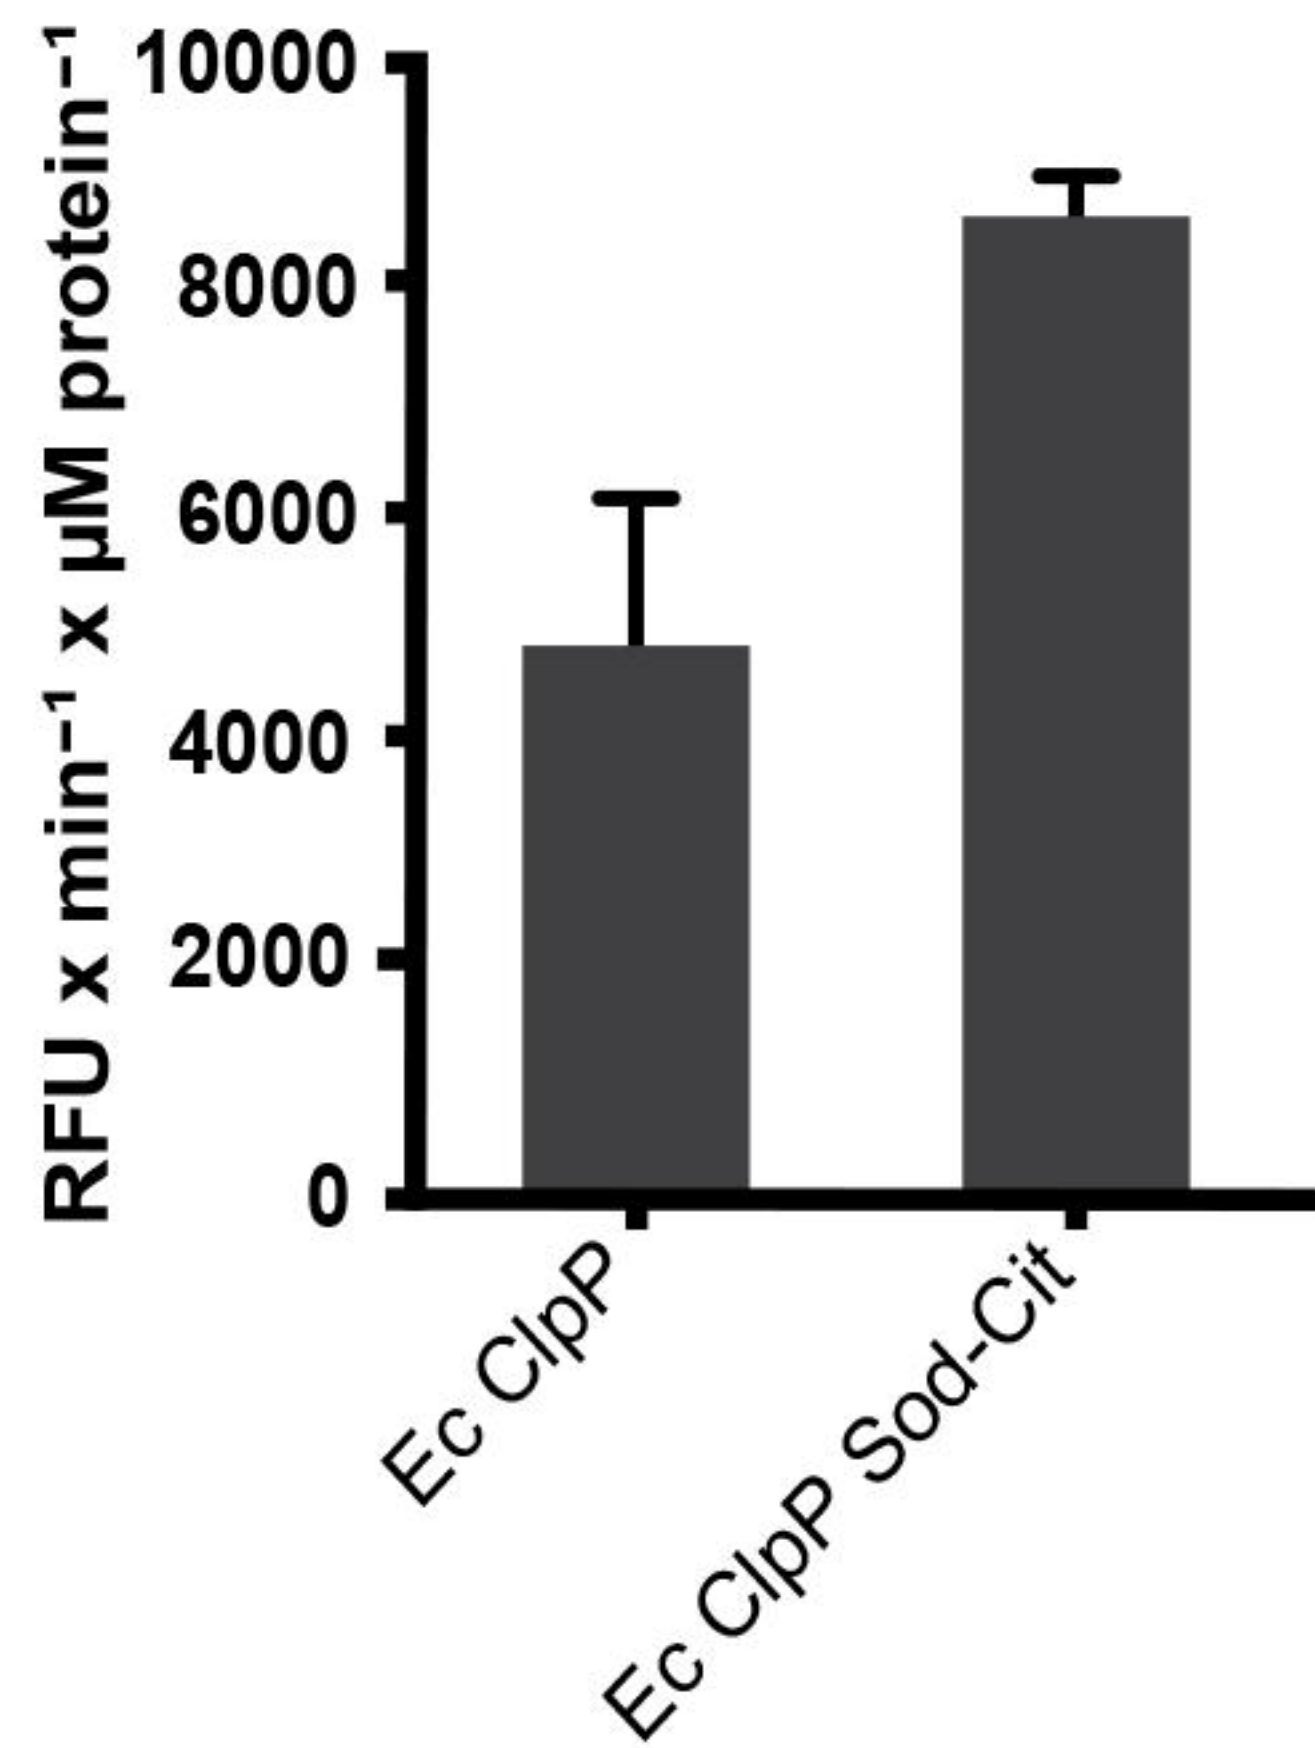

Fig. 5

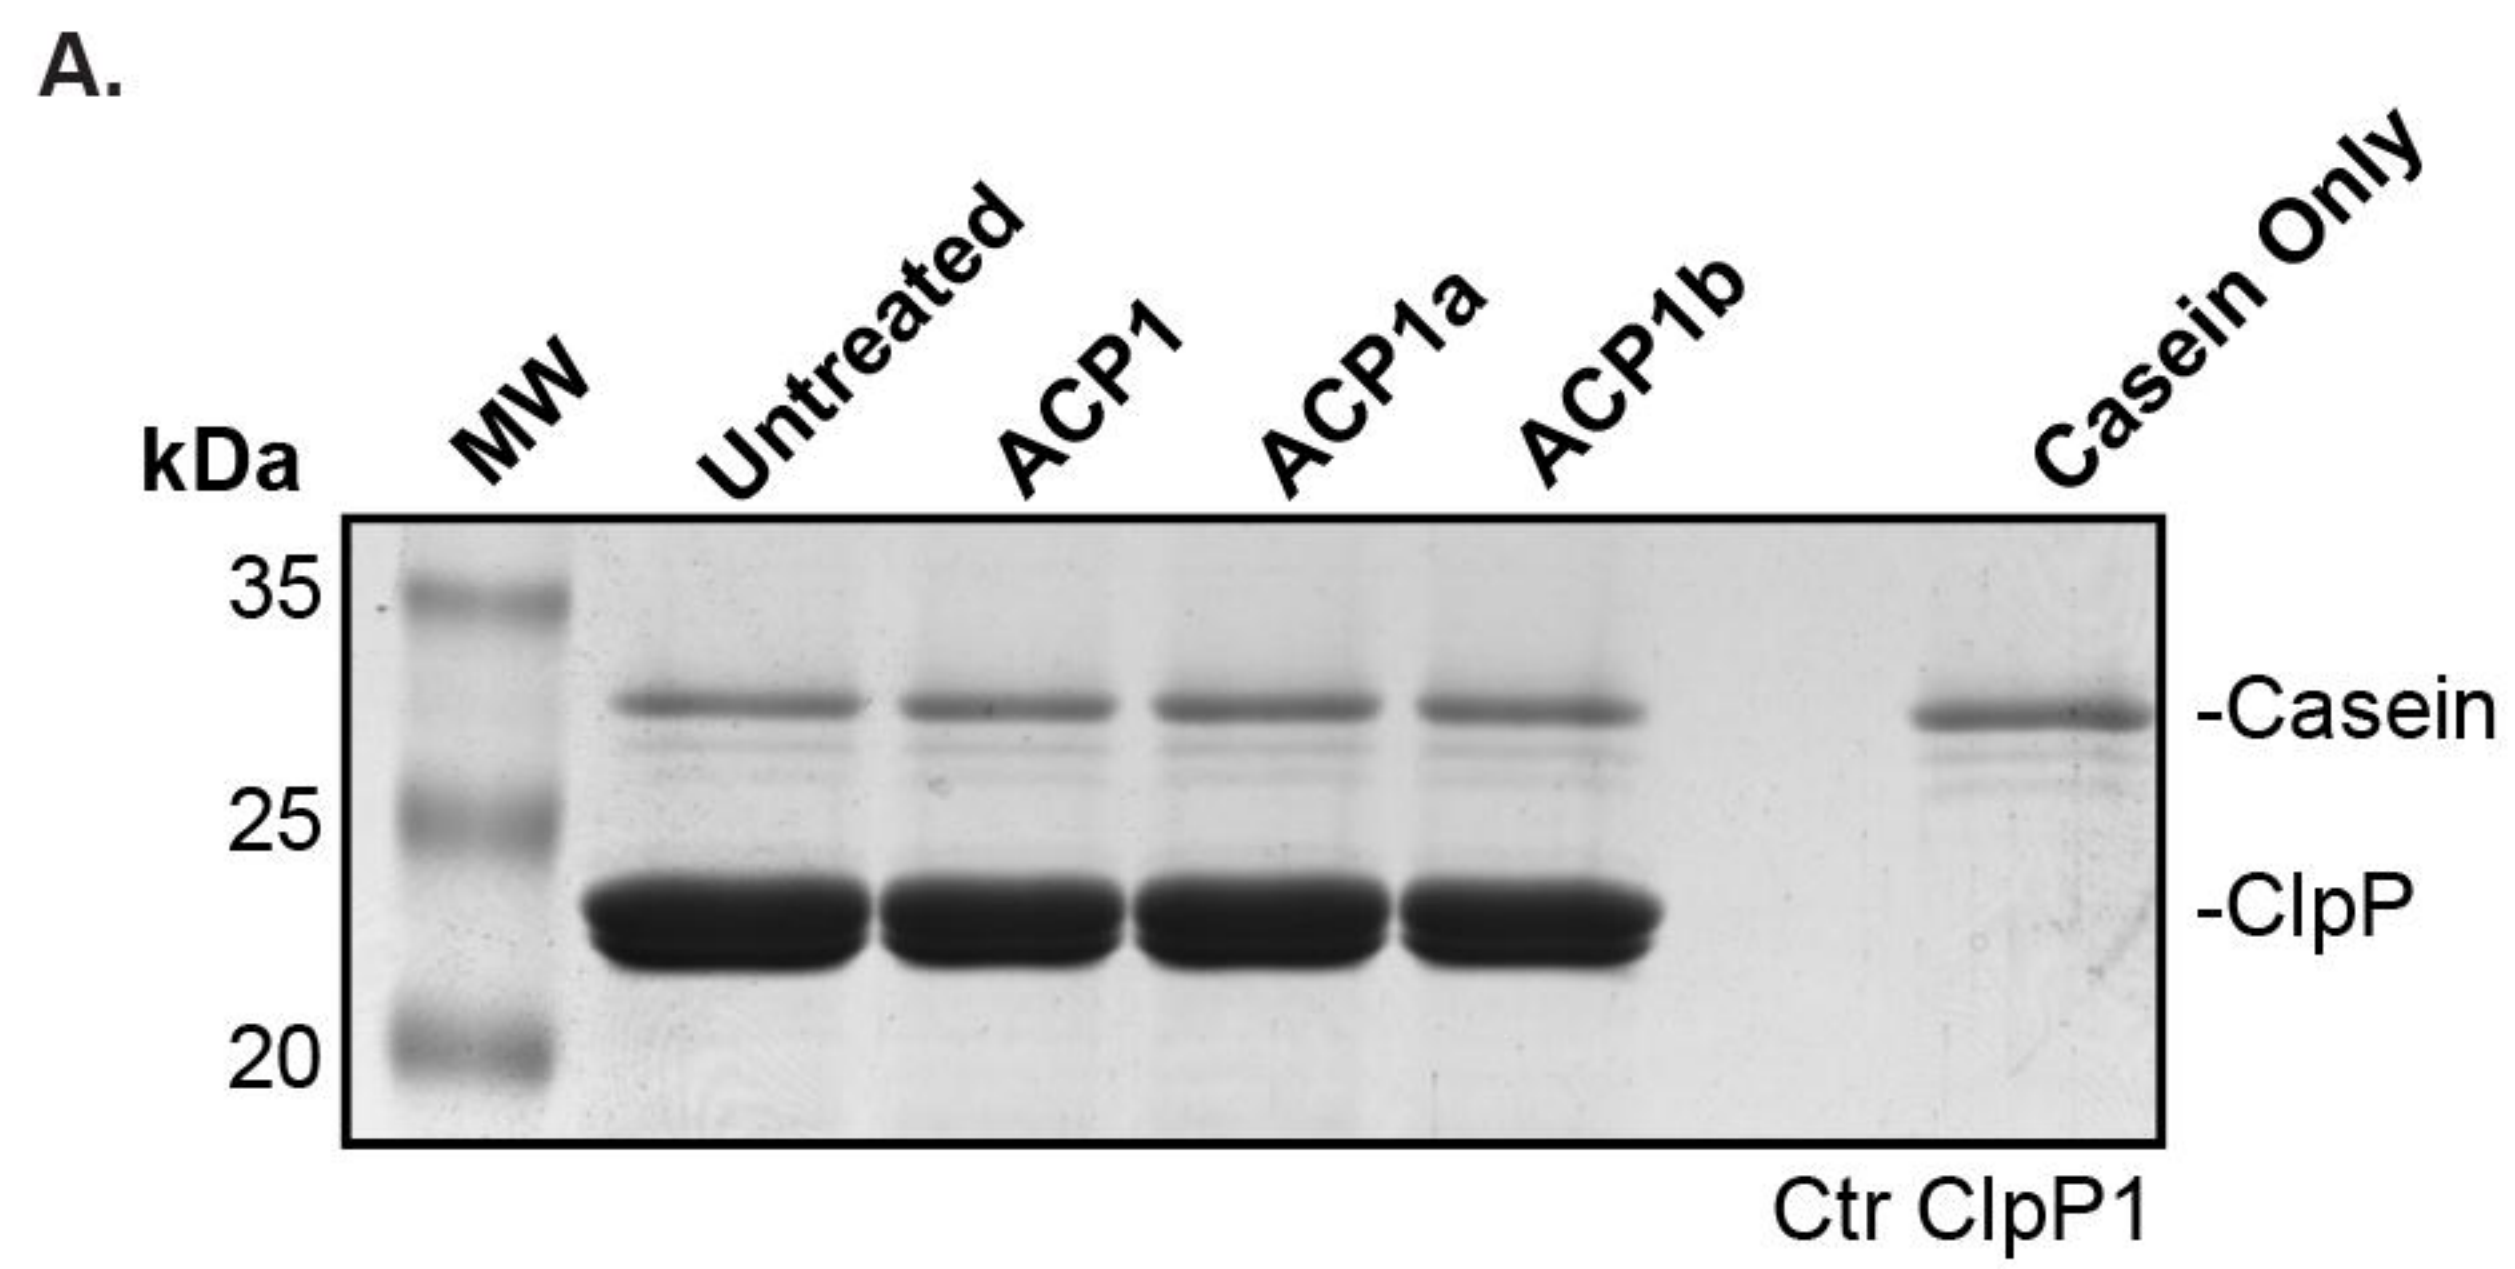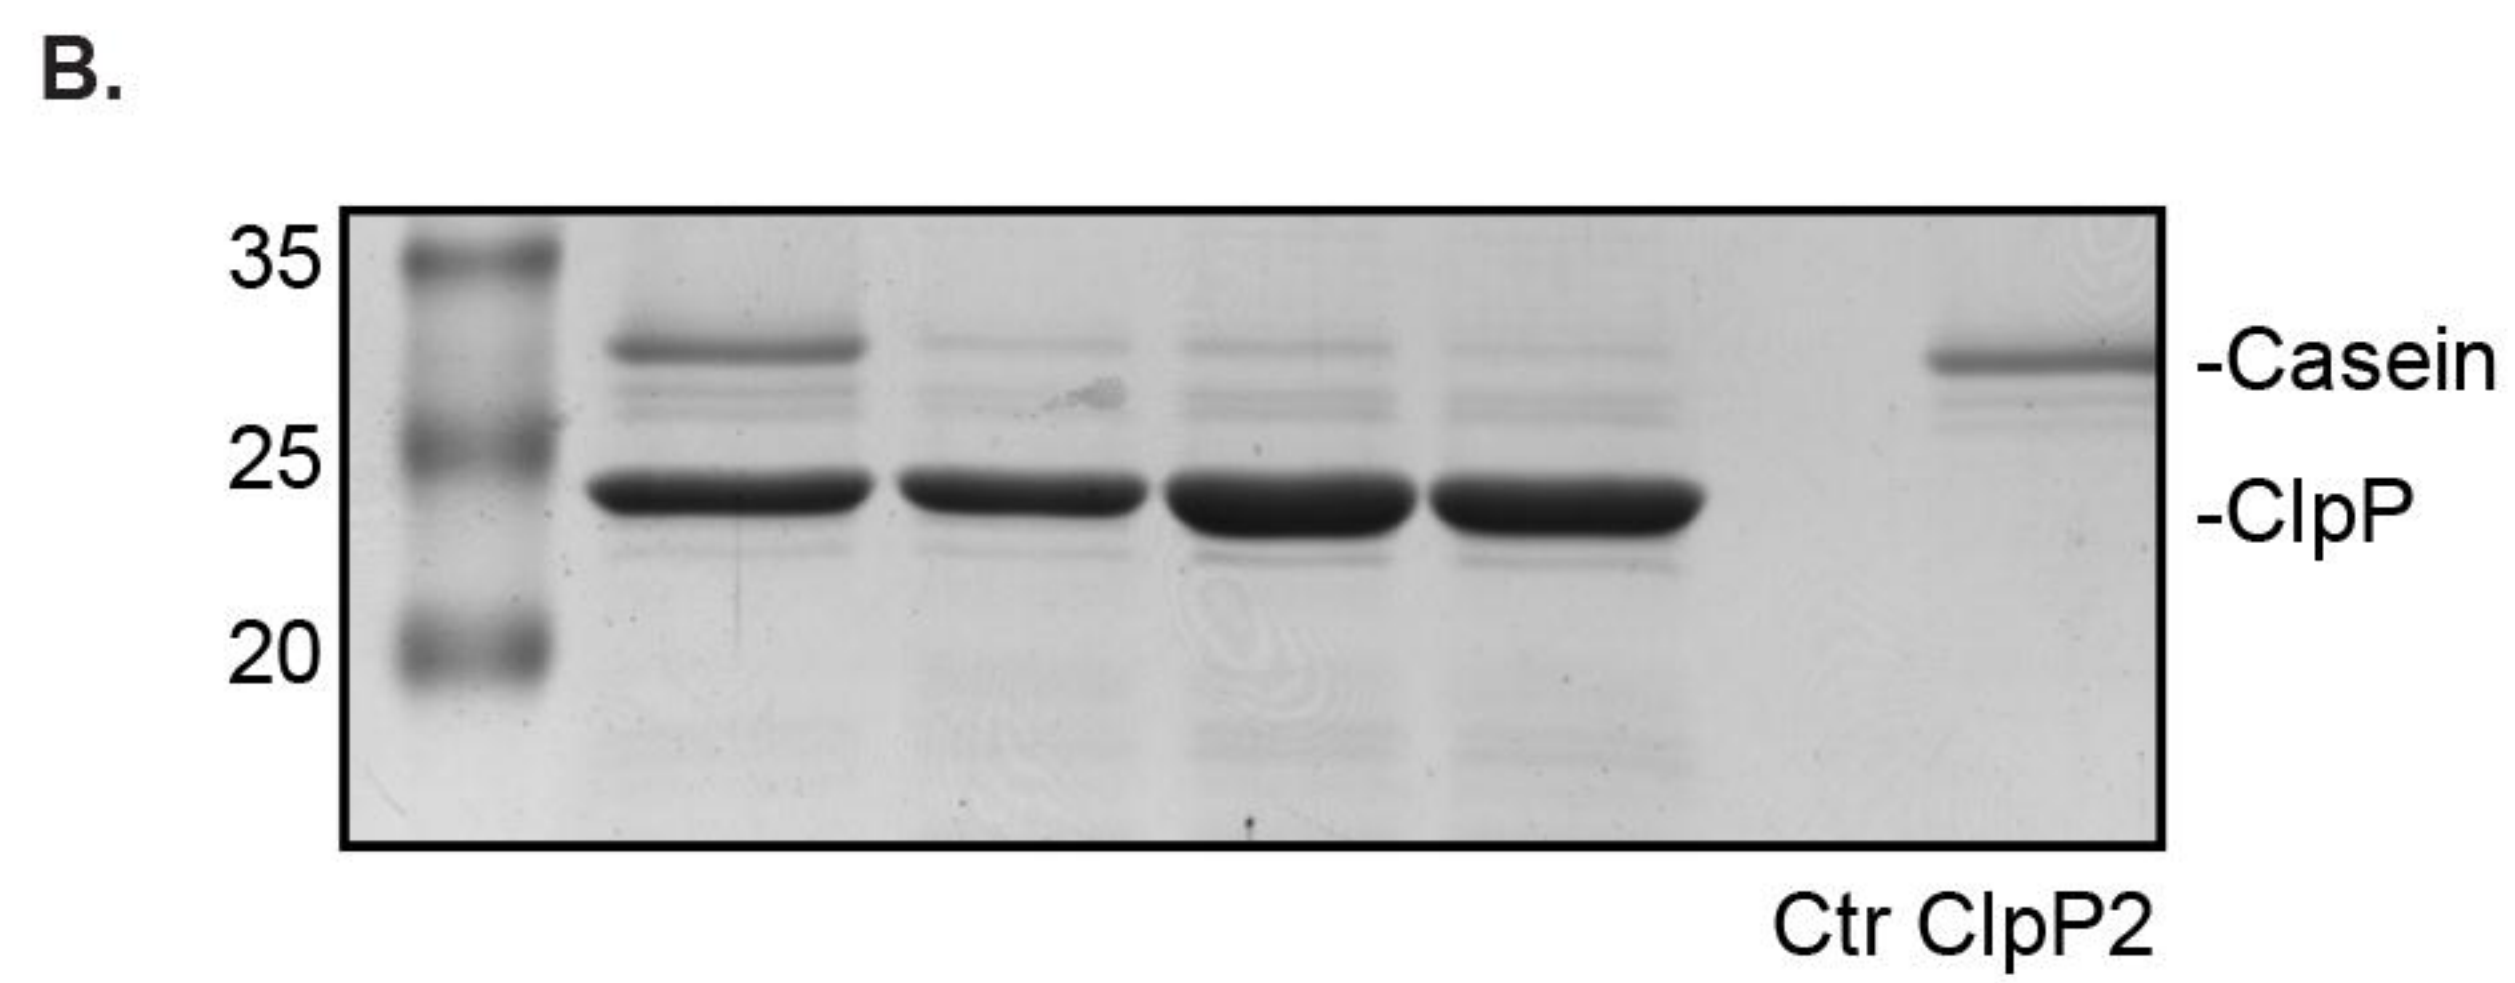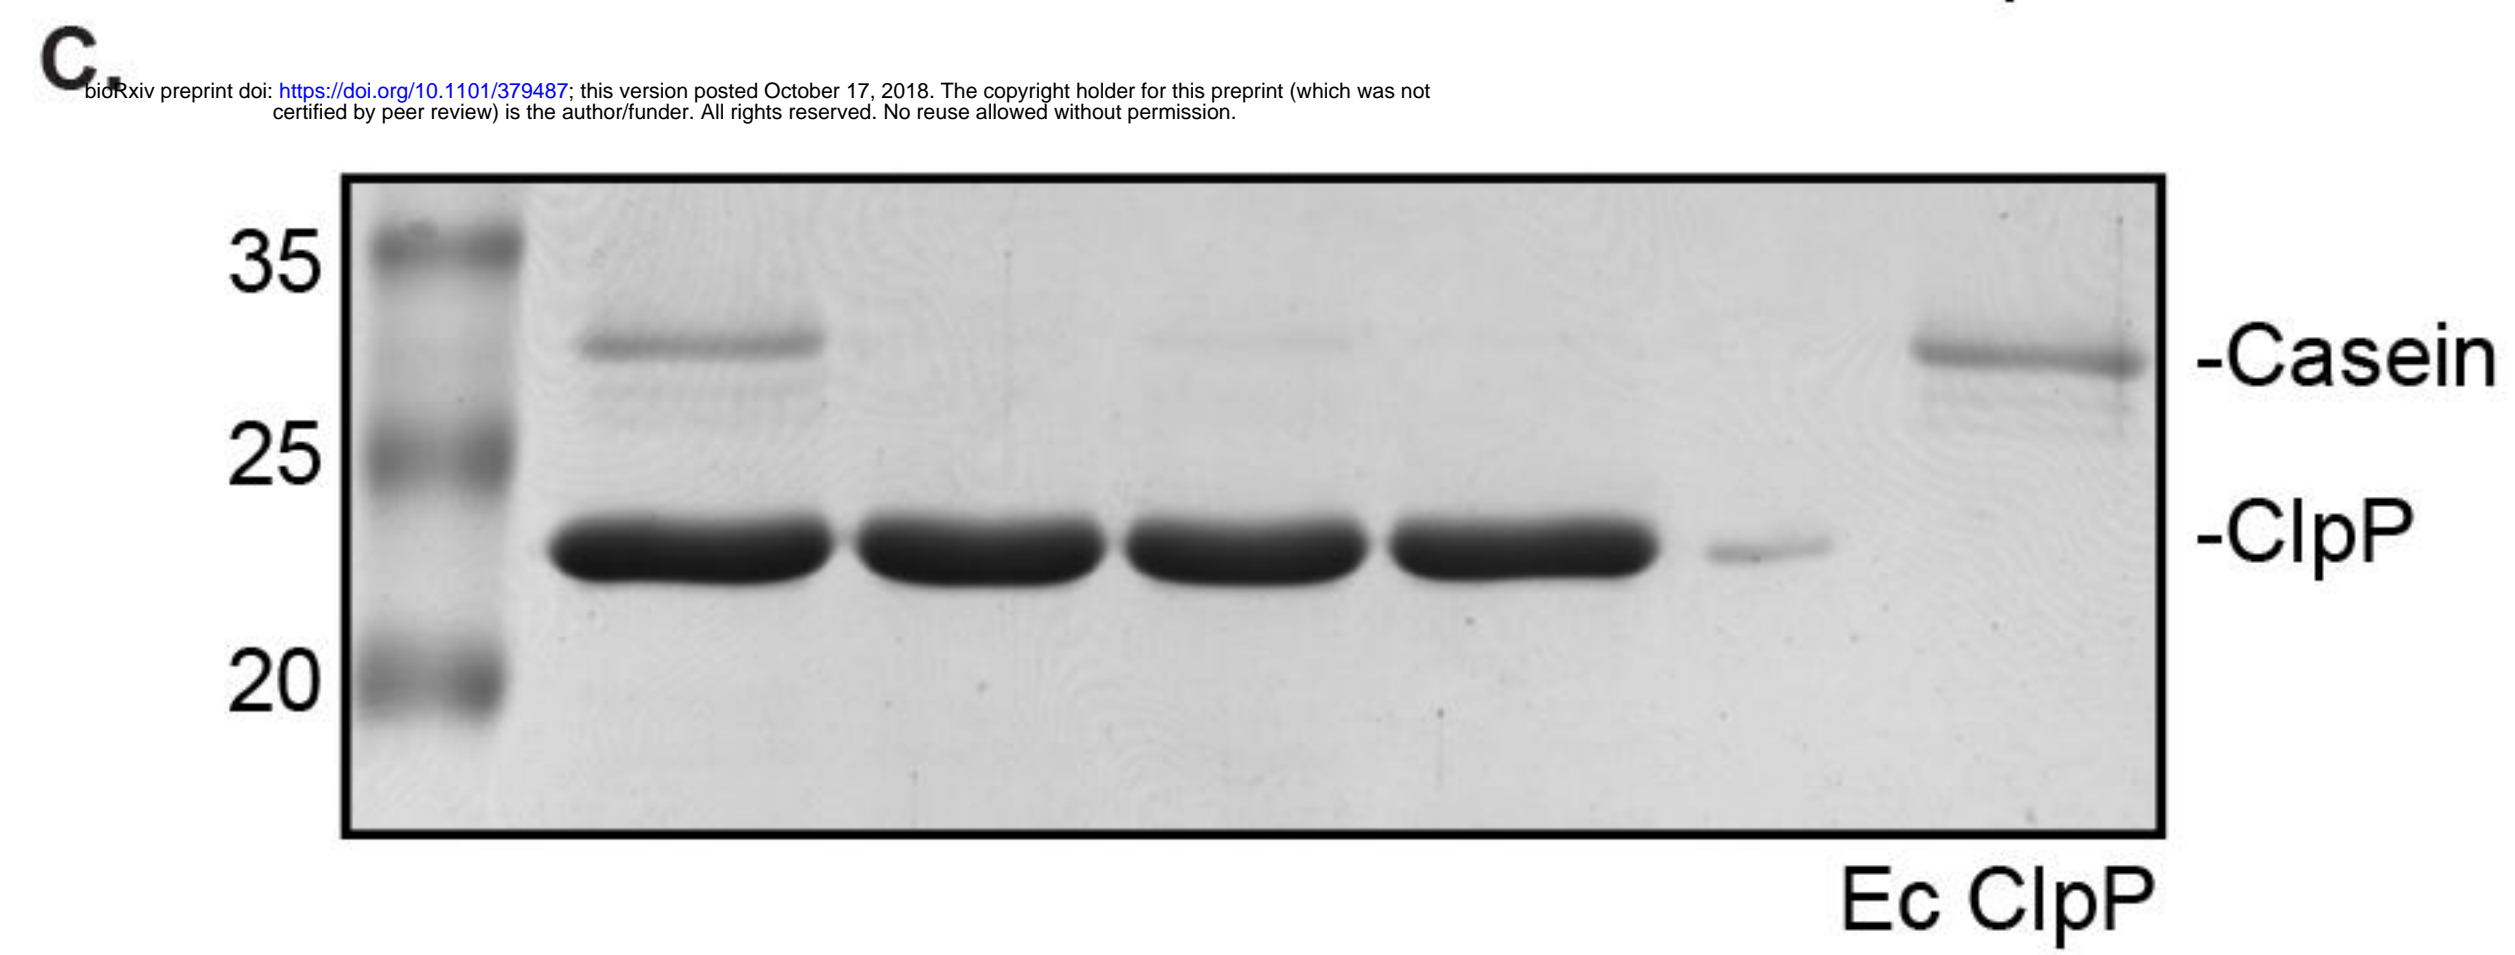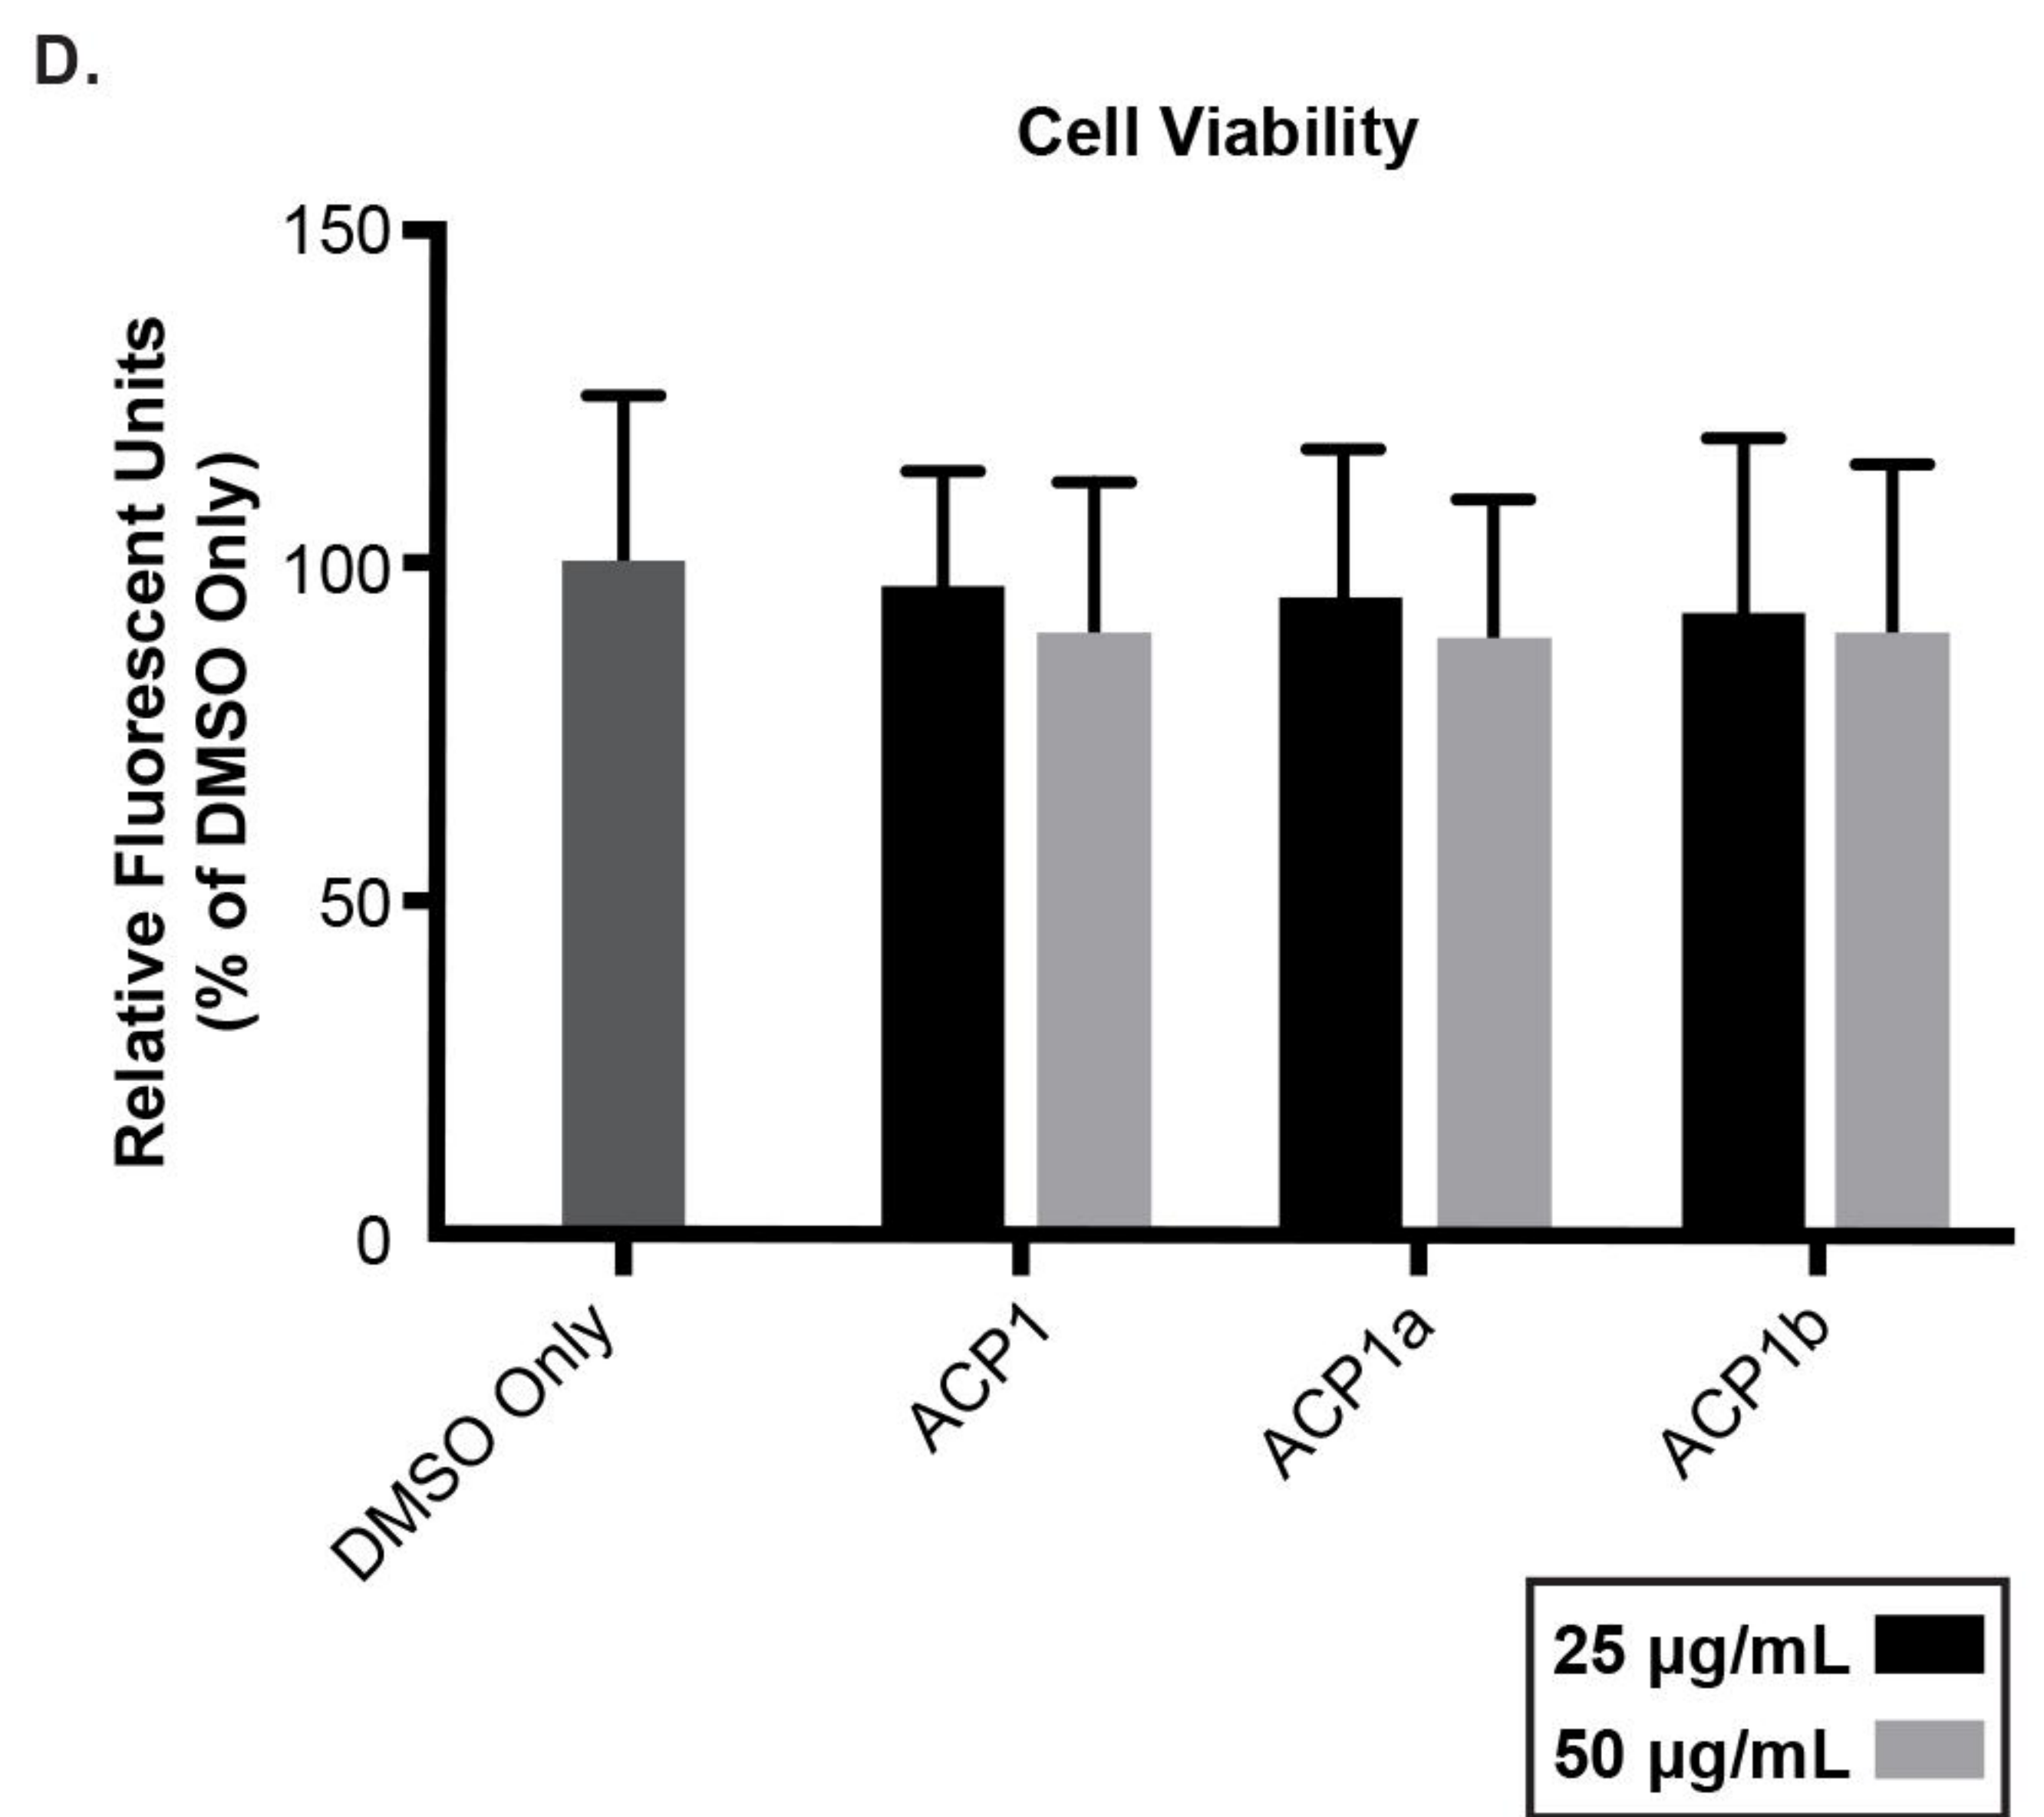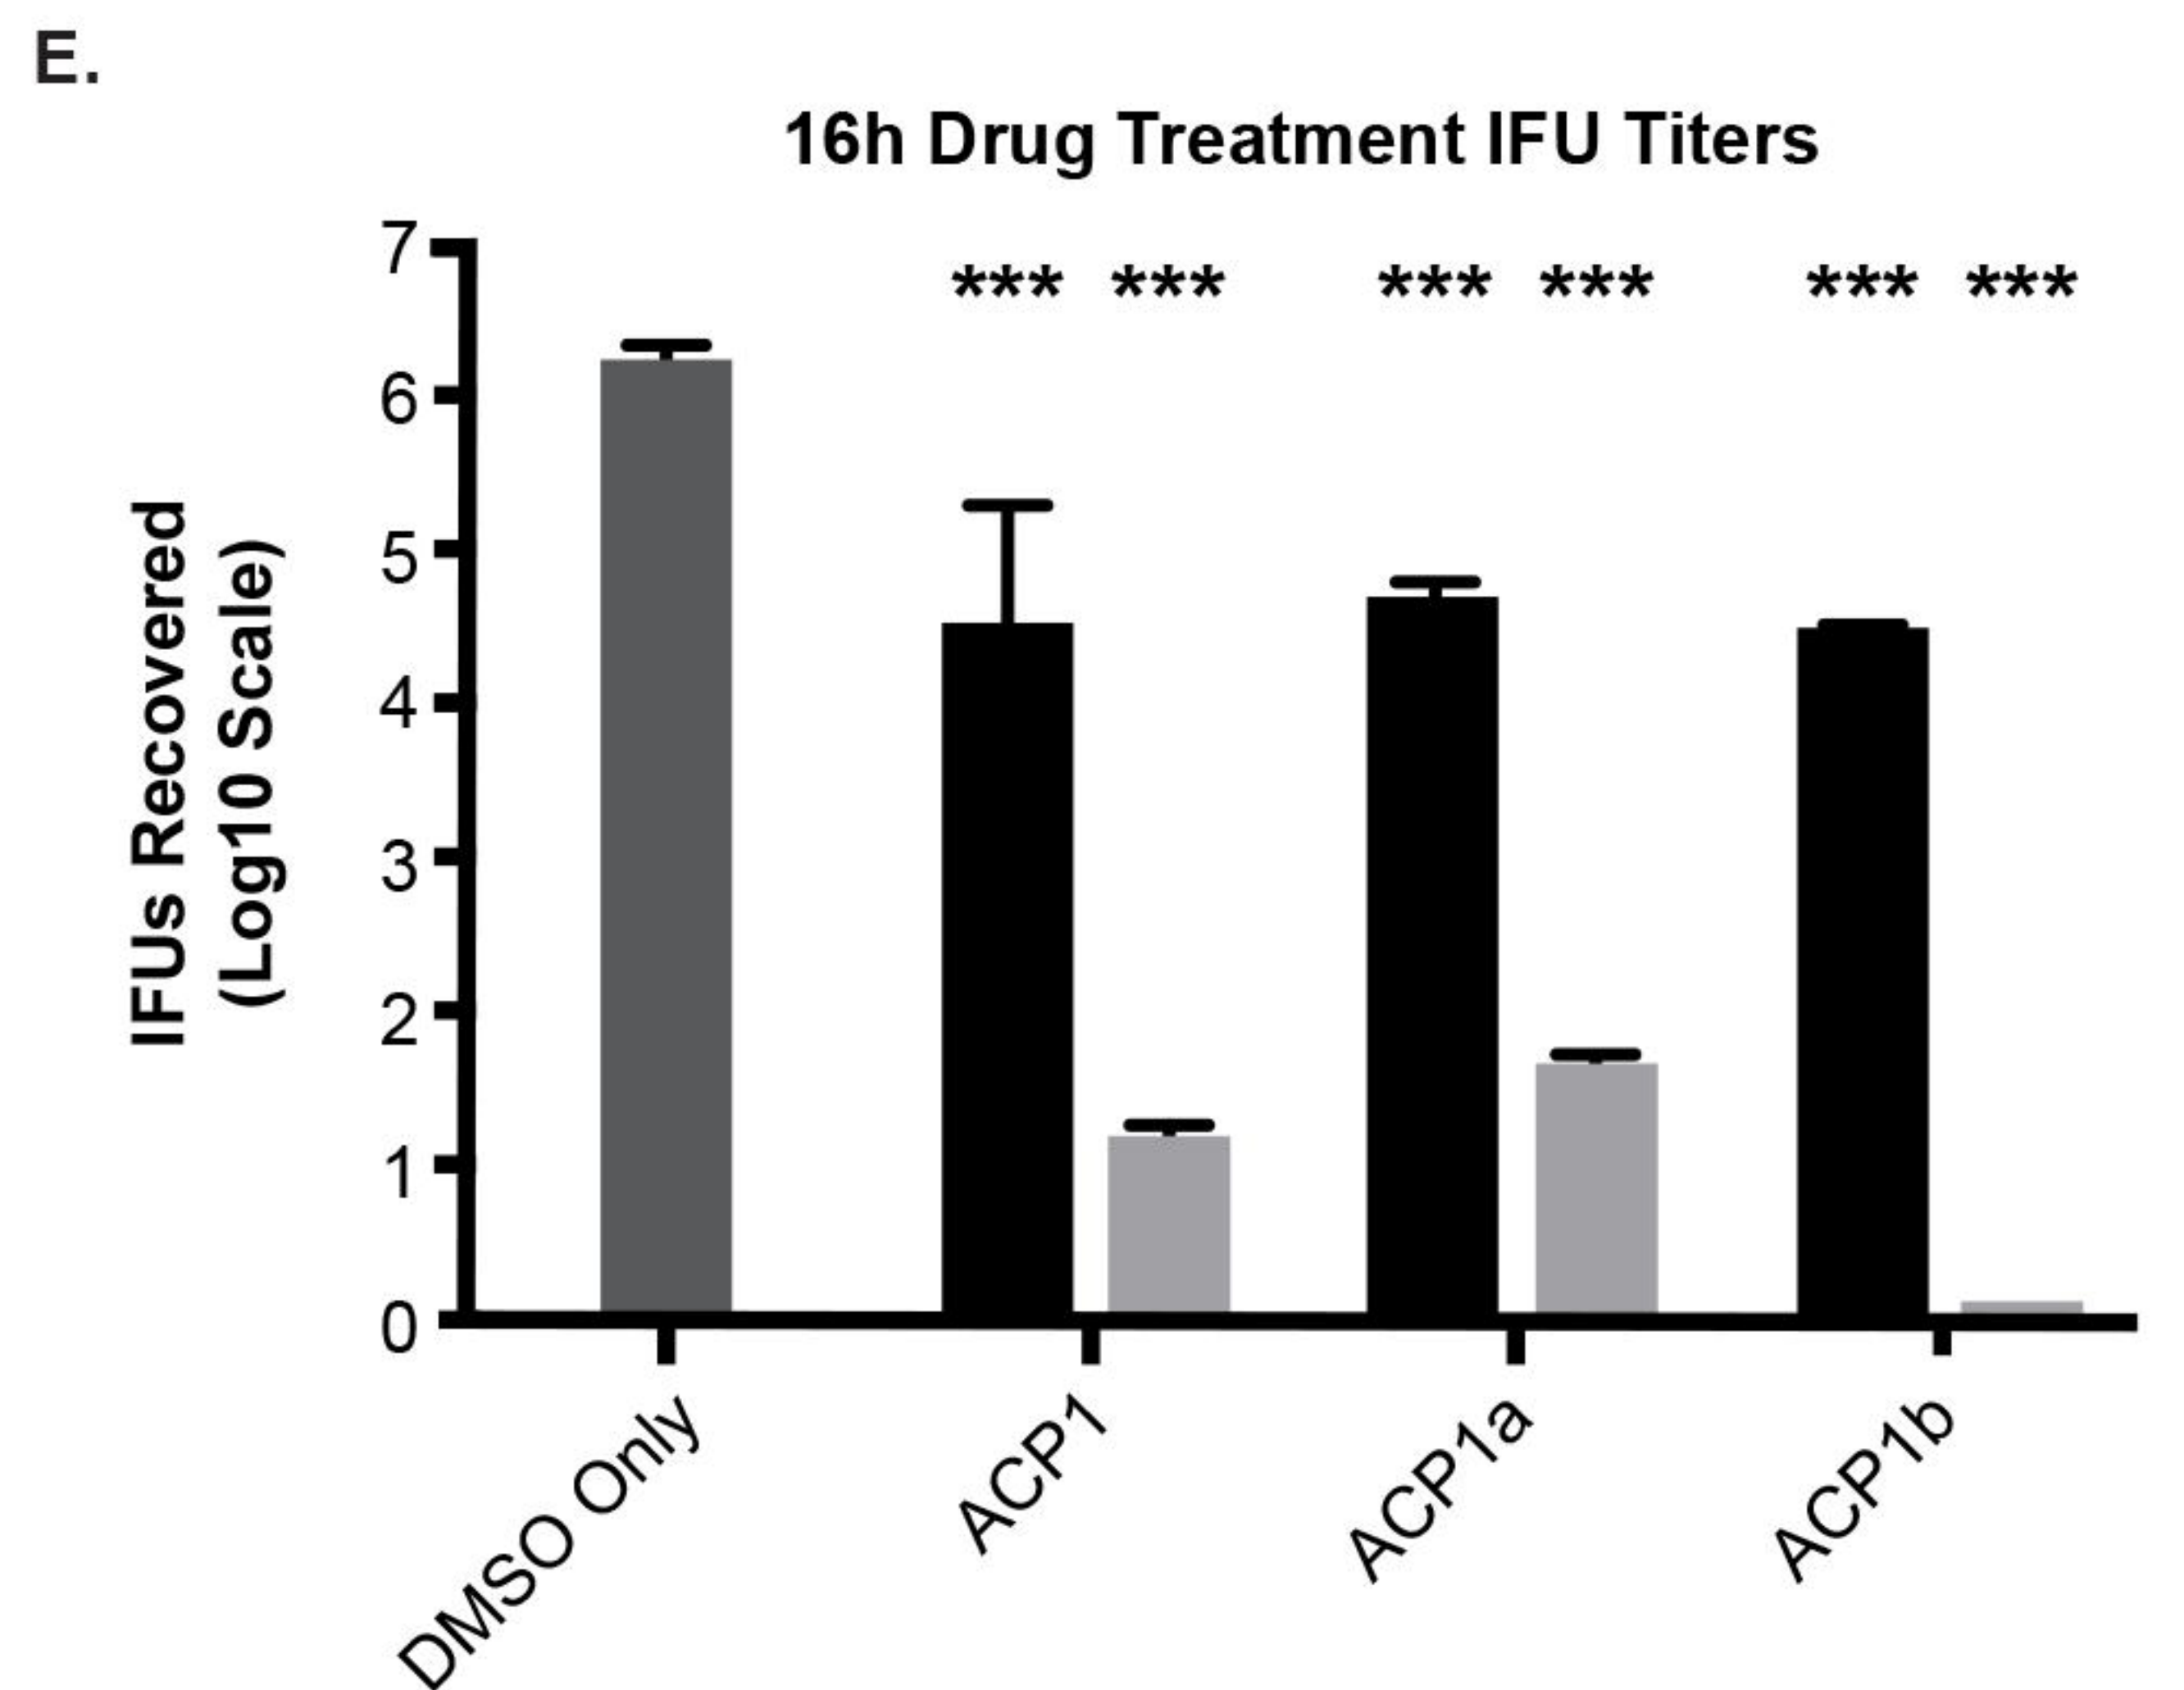

Fig. 6
